# Supplementary material for: Binuclear platinum(ii) complexes bearing various bridging 1,1′-diphosphinoferrocene ligands as potential anticancer agents: synthesis and biological evaluation
Source: Royal Society of Chemistry journal article supplement (doi:10.1039/d2nj05303a), 2022-11-29
Supplement: d2nj05303a2.pdf [file d2nj05303a2.pdf]

## Electronic Supplementary Information

### **Binuclear platinum(II) complexes bearing various bridging 1,1'-diphosphinoferrocene ligands as potential anticancer agents: Synthesis and biological evaluations**

*Jalalaldin Zangeneh,<sup>a</sup> Lotfollah Saghaie,<sup>\*a</sup> Mahmoud Etebari,<sup>b</sup> Vahideh Dolatyari,<sup>c</sup> Zahra Farasat,<sup>d</sup> Masood Fereidoonzhad,<sup>e</sup> and Hamid R. Shamsavari<sup>\*c</sup>*

<sup>a</sup>Department of Medicinal Chemistry, School of Pharmacy and Pharmaceutical Sciences, Isfahan University of Medical Sciences, Isfahan, Iran. \*E-mail: saghaie@pharm.mui.ac.ir. L.S. is the corresponding author of the biology section.

<sup>b</sup>Department of pharmacology and toxicology, School of Pharmacy and Pharmaceutical Sciences, Isfahan University of Medical Sciences, Isfahan, Iran.

<sup>c</sup>Department of Chemistry, Institute for Advanced Studies in Basic Sciences (IASBS), Zanjan 45137-66731, Iran. \*E-mail: shamsavari@iasbs.ac.ir.

<sup>d</sup>Professor Rashidi Laboratory of Organometallic Chemistry, Department of Chemistry, College of Sciences, Shiraz University, Shiraz, 71467-13565, Iran.

<sup>e</sup>Department of Medicinal Chemistry, School of Pharmacy; Cancer, Environmental and Petroleum Pollutants Research Center, Ahvaz Jundishapur University of Medical Sciences, Ahvaz, Iran.

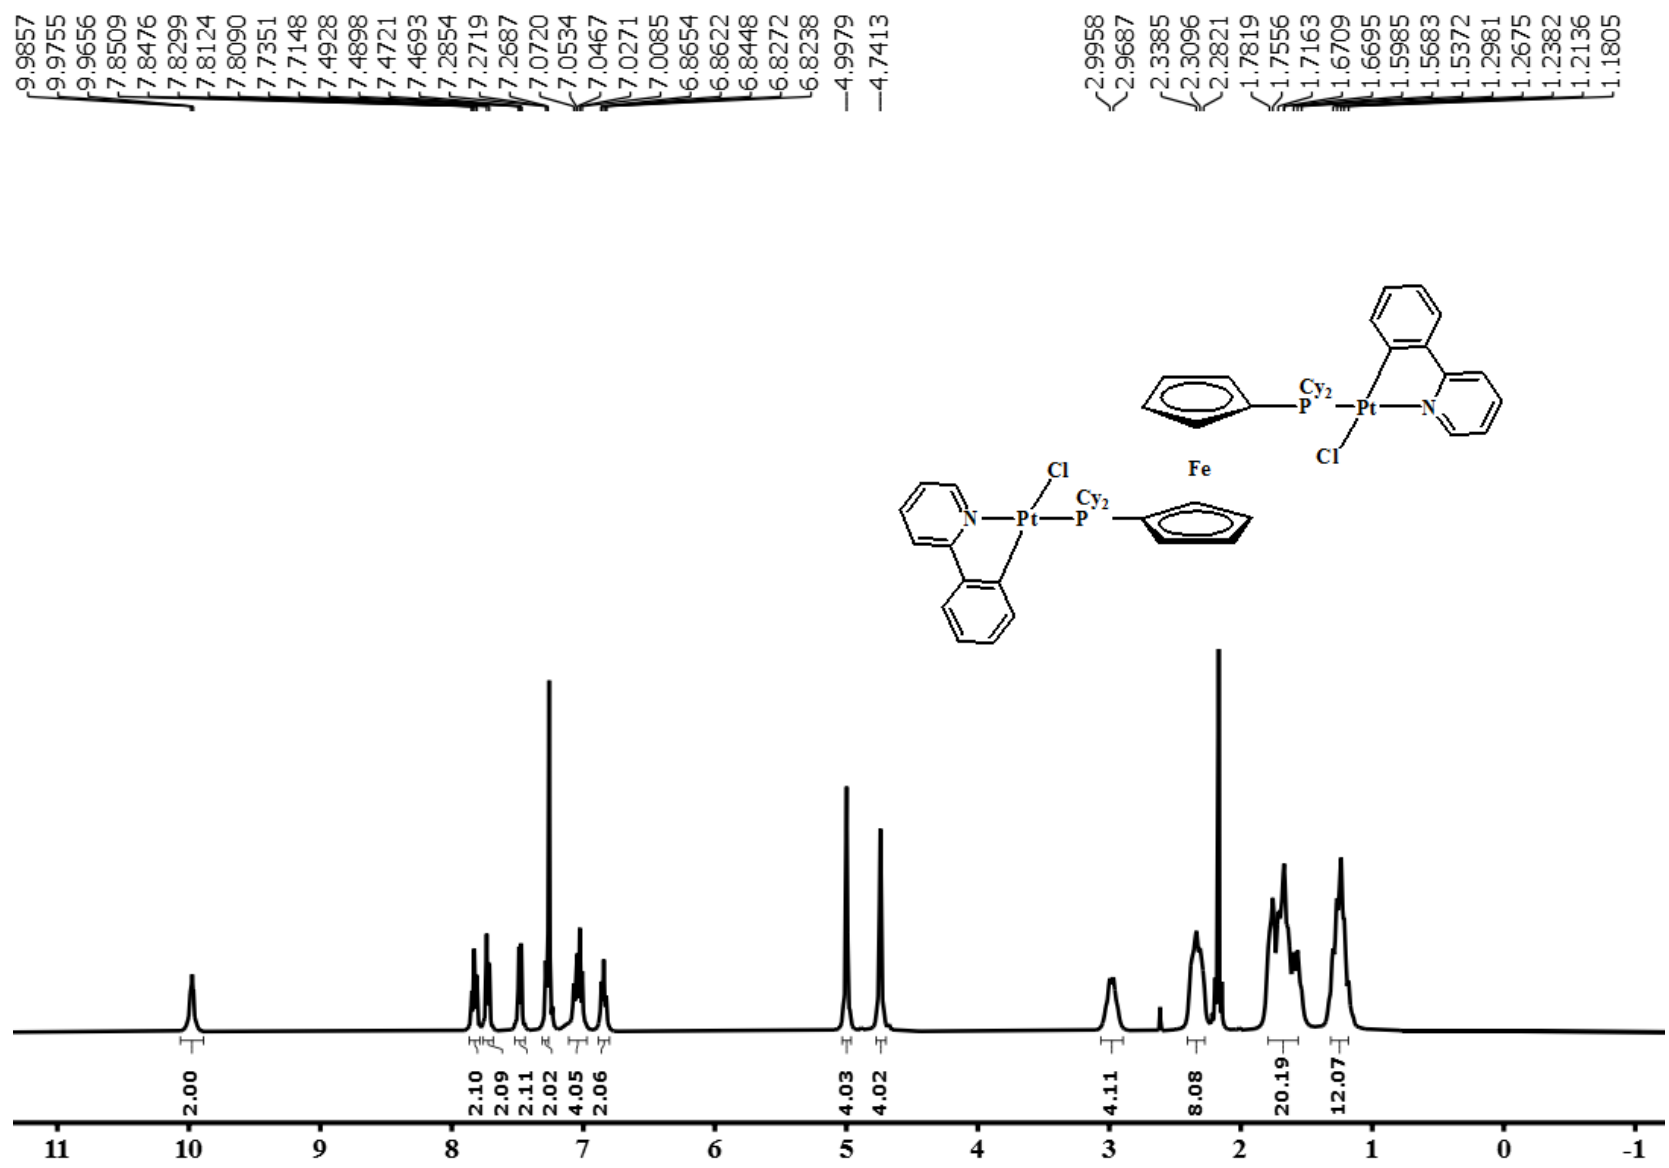

Figure S1. <sup>1</sup>H NMR spectrum of **2b** in CDCl<sub>3</sub>.

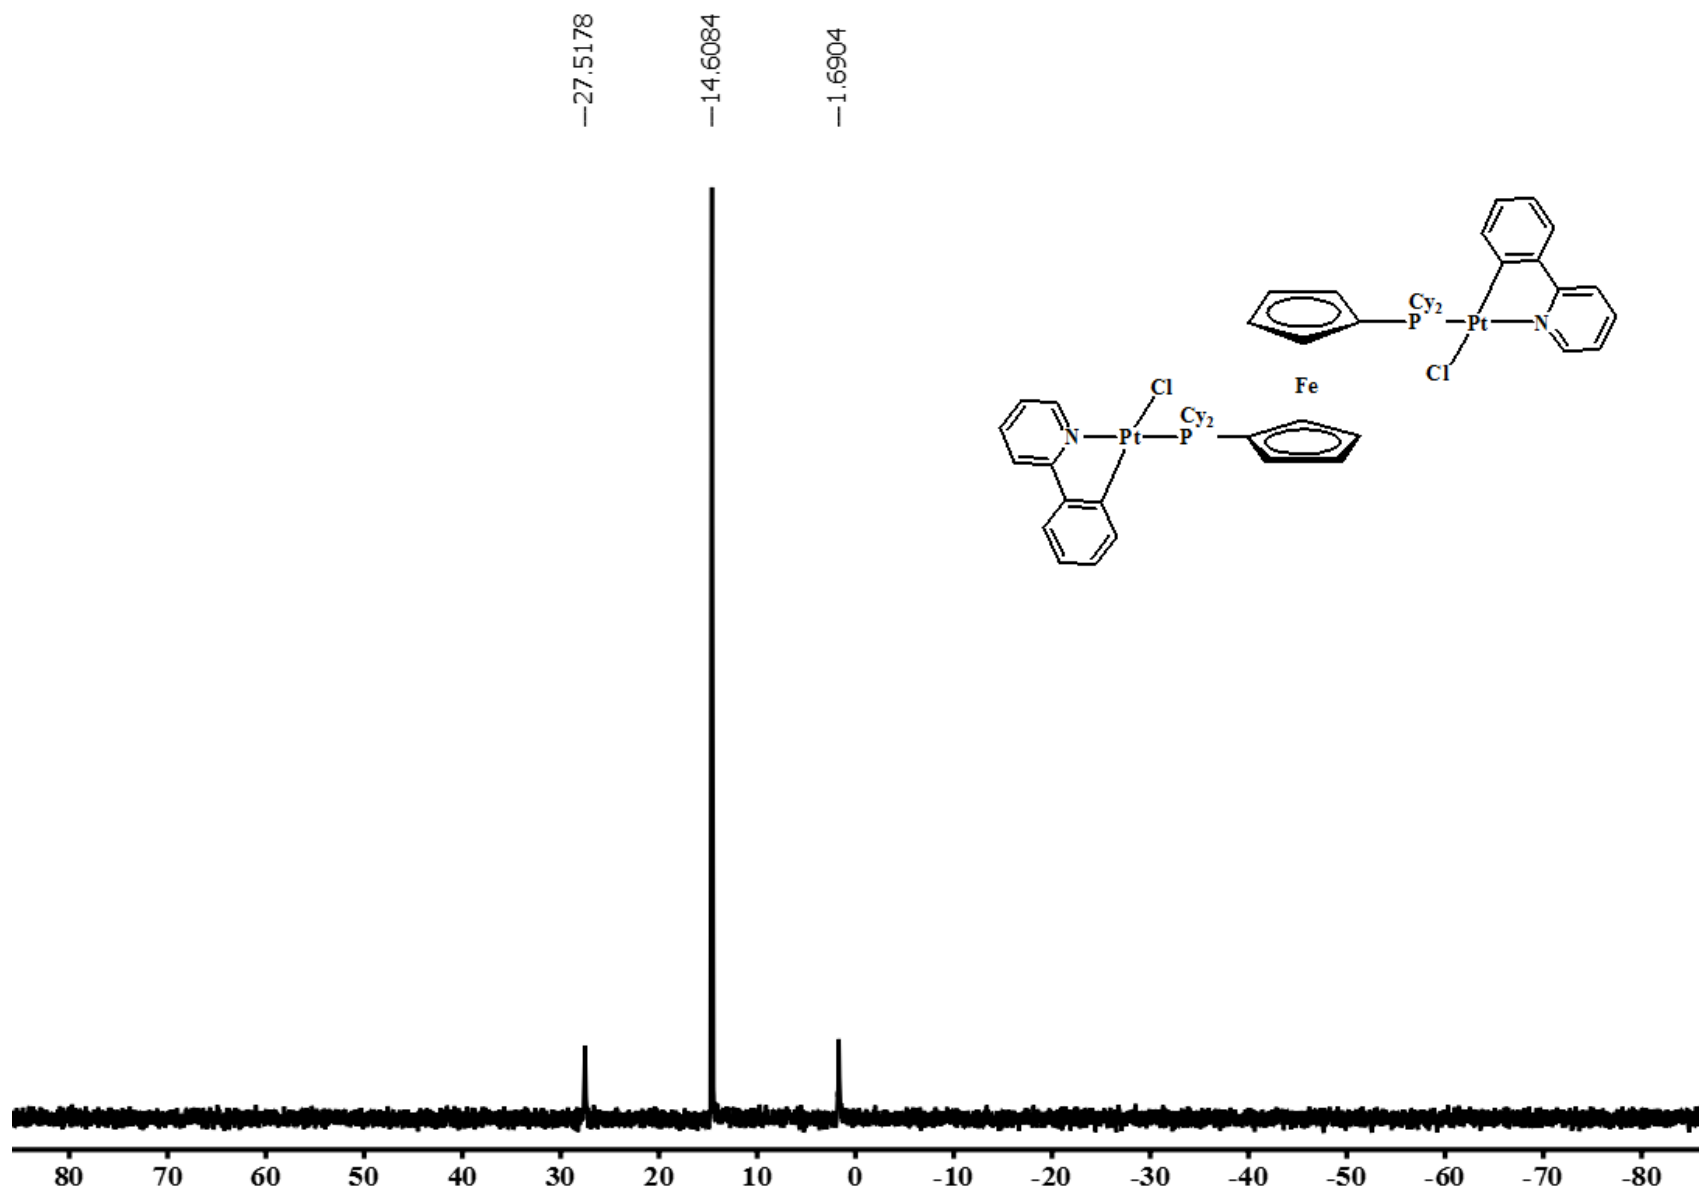

Figure S2.  $^{31}\text{P}\{^1\text{H}\}$  NMR spectrum of **2b** in  $\text{CDCl}_3$ .

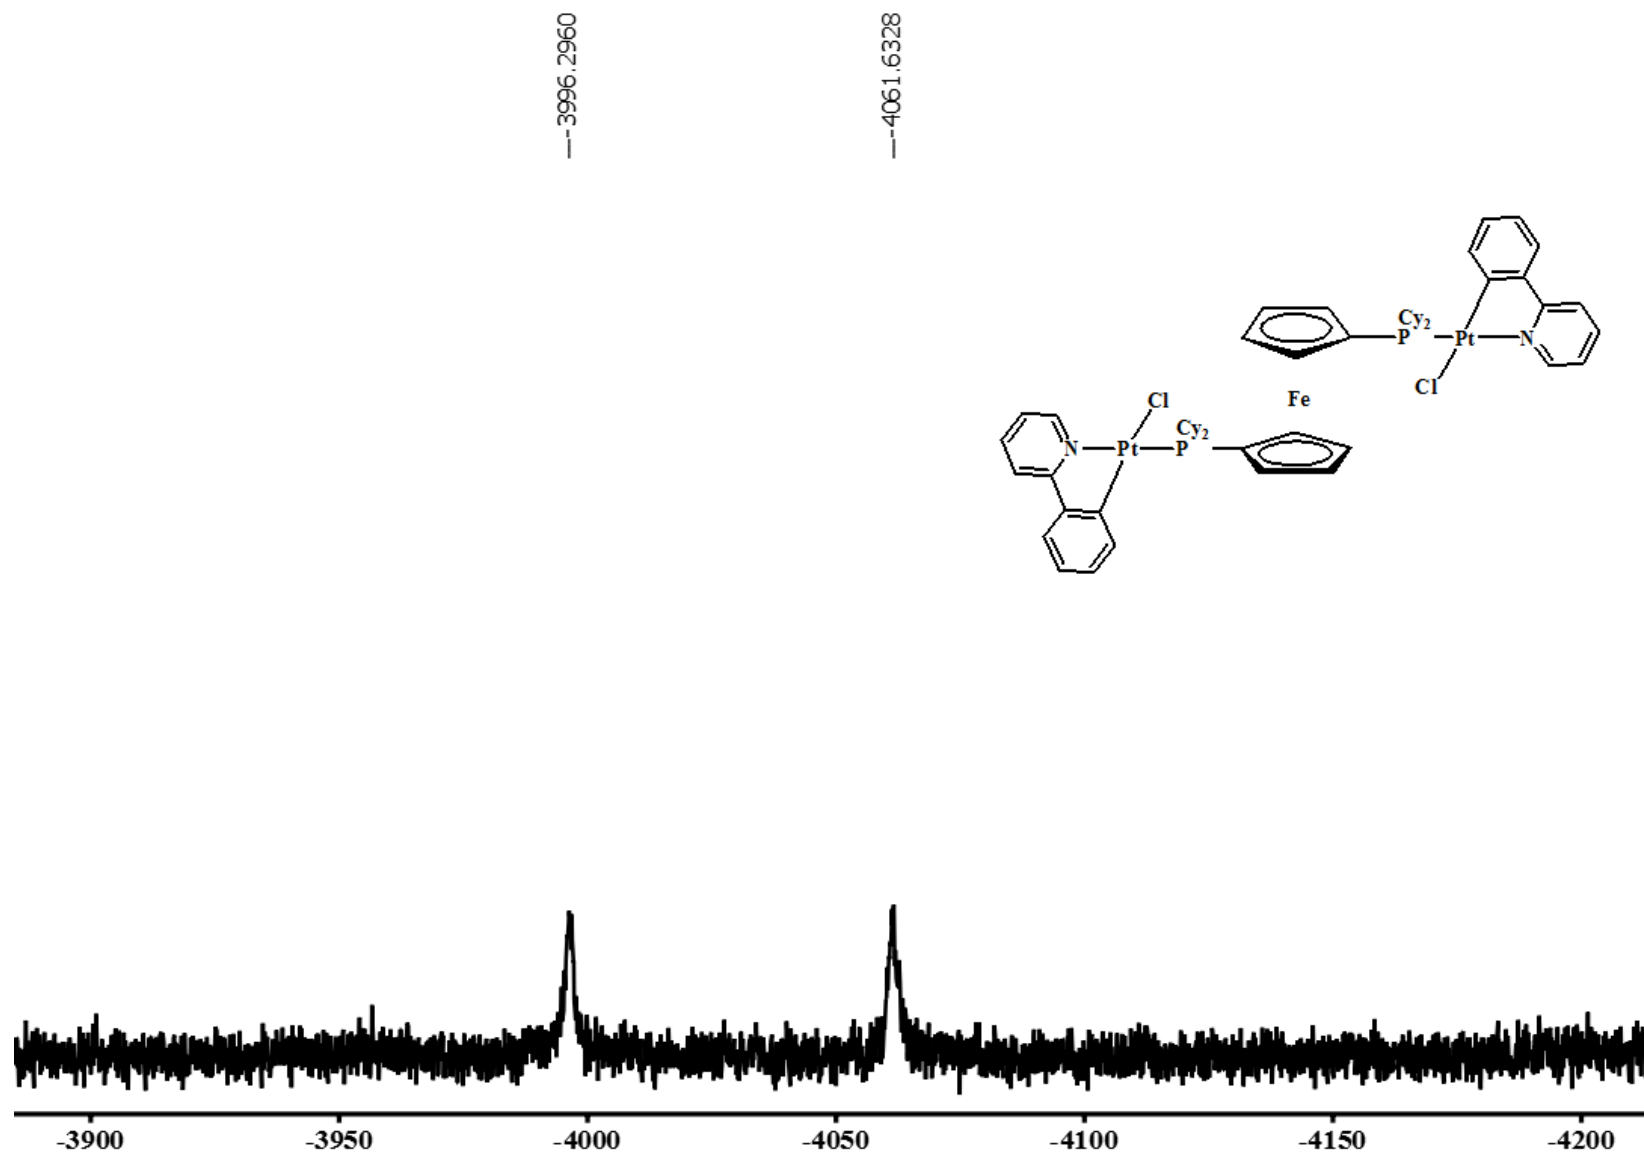

**Figure S3.**  $^{195}\text{Pt}\{^1\text{H}\}$  NMR spectrum of **2b** in  $\text{CDCl}_3$ .

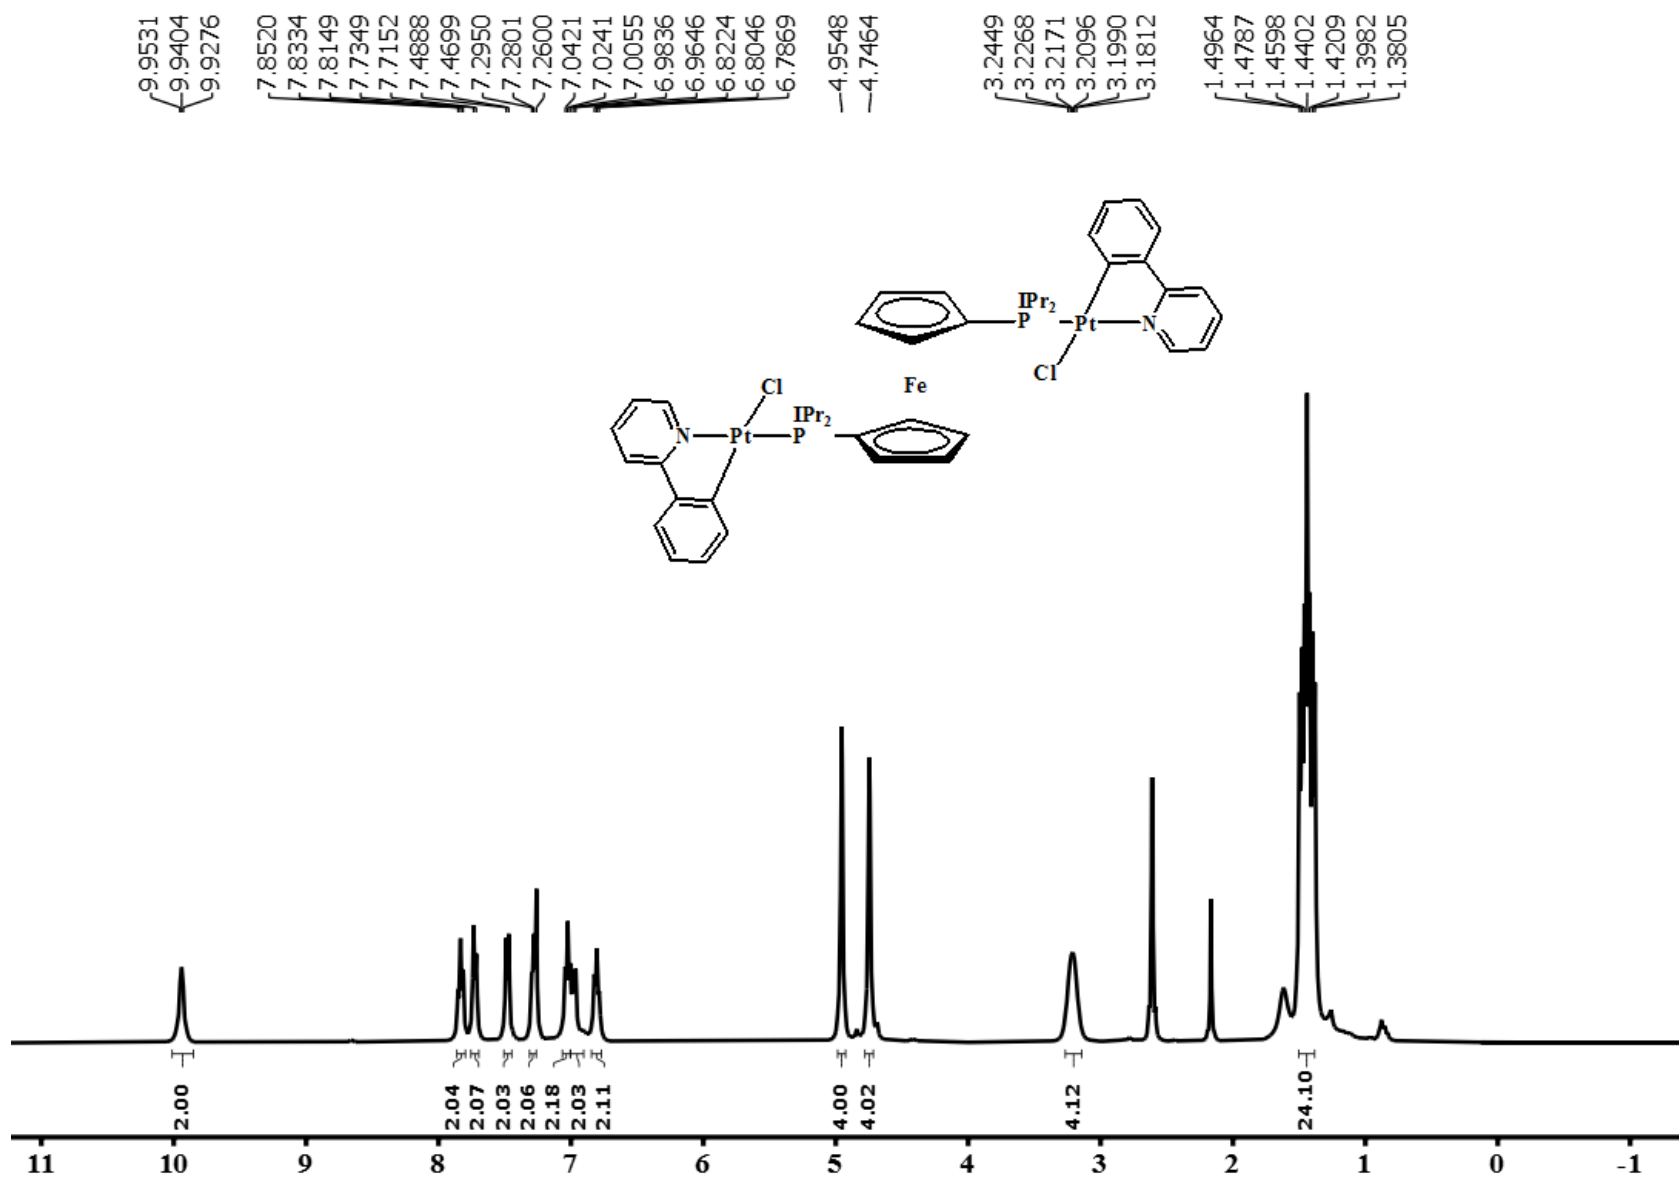

Figure S4.  $^1\text{H}$  NMR spectrum of **2c** in  $\text{CDCl}_3$ .

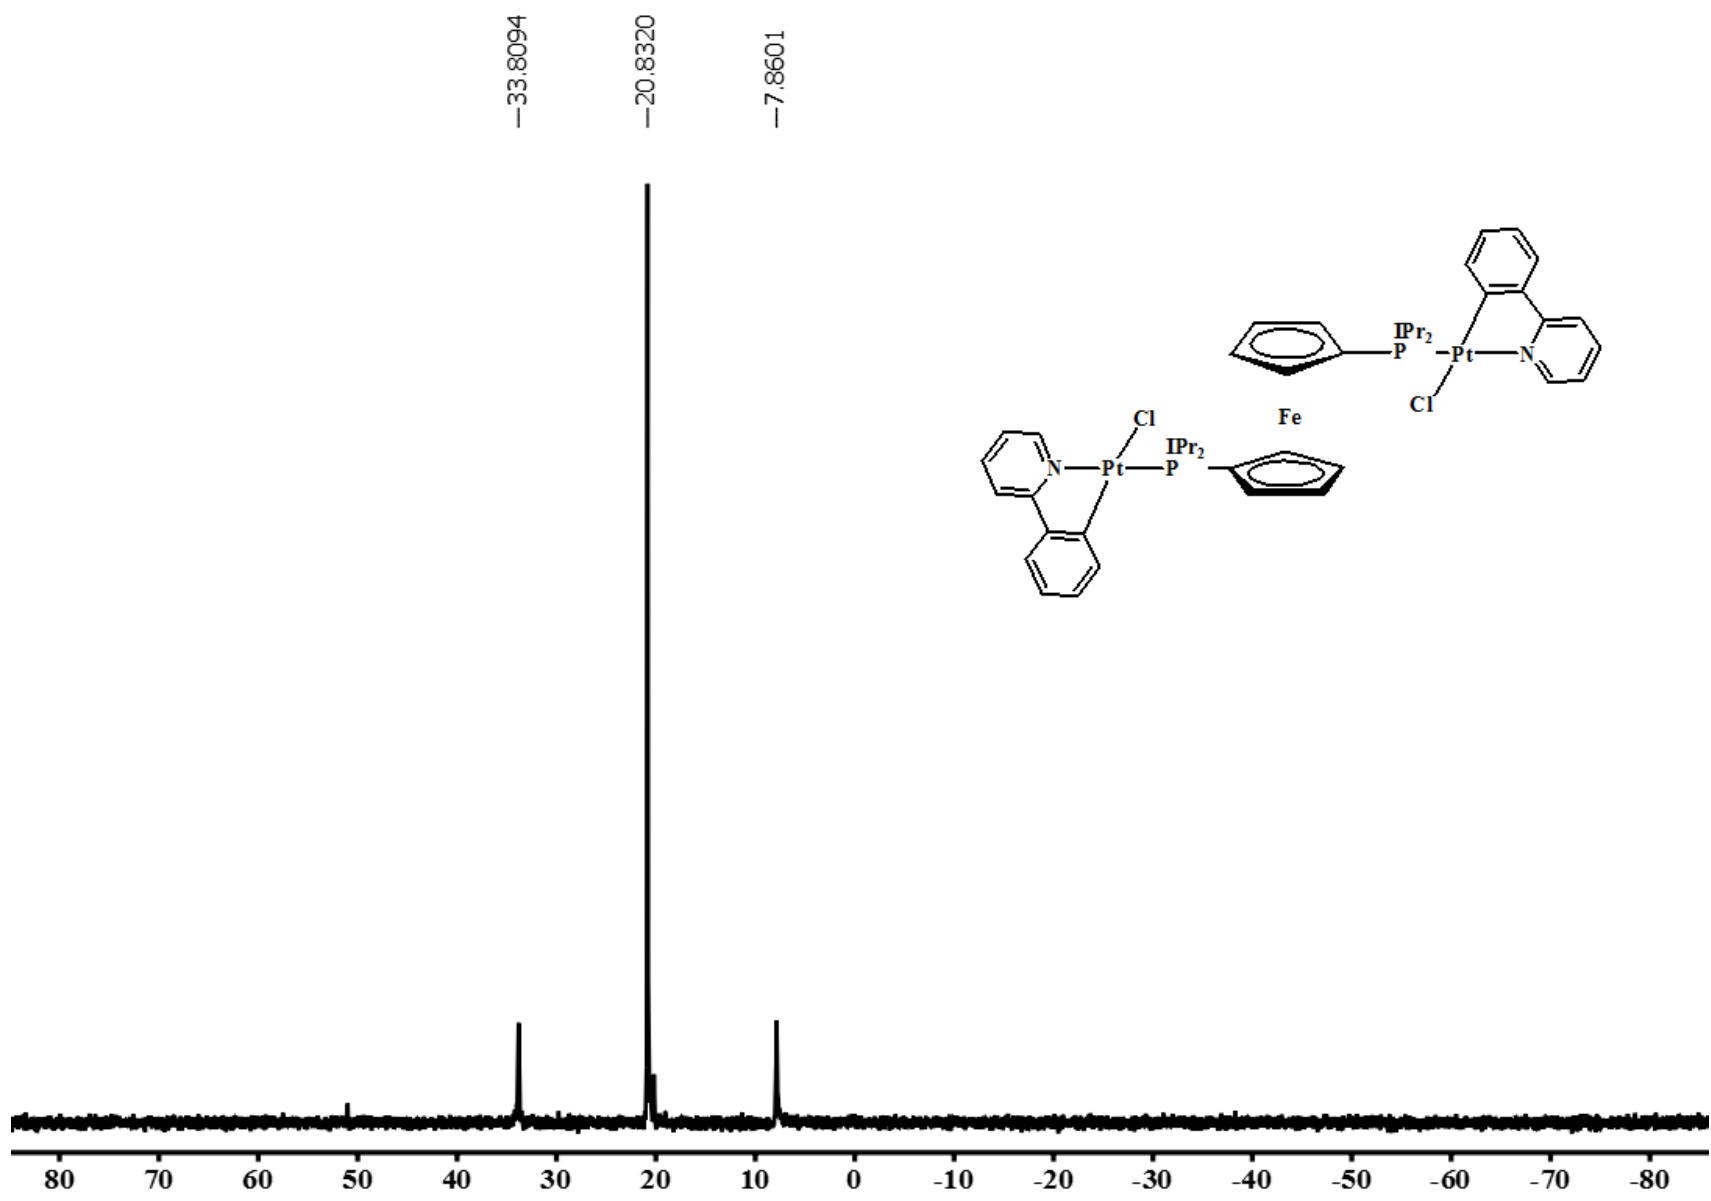

Figure S5.  $^{31}\text{P}\{^1\text{H}\}$  NMR spectrum of **2c** in  $\text{CDCl}_3$ .

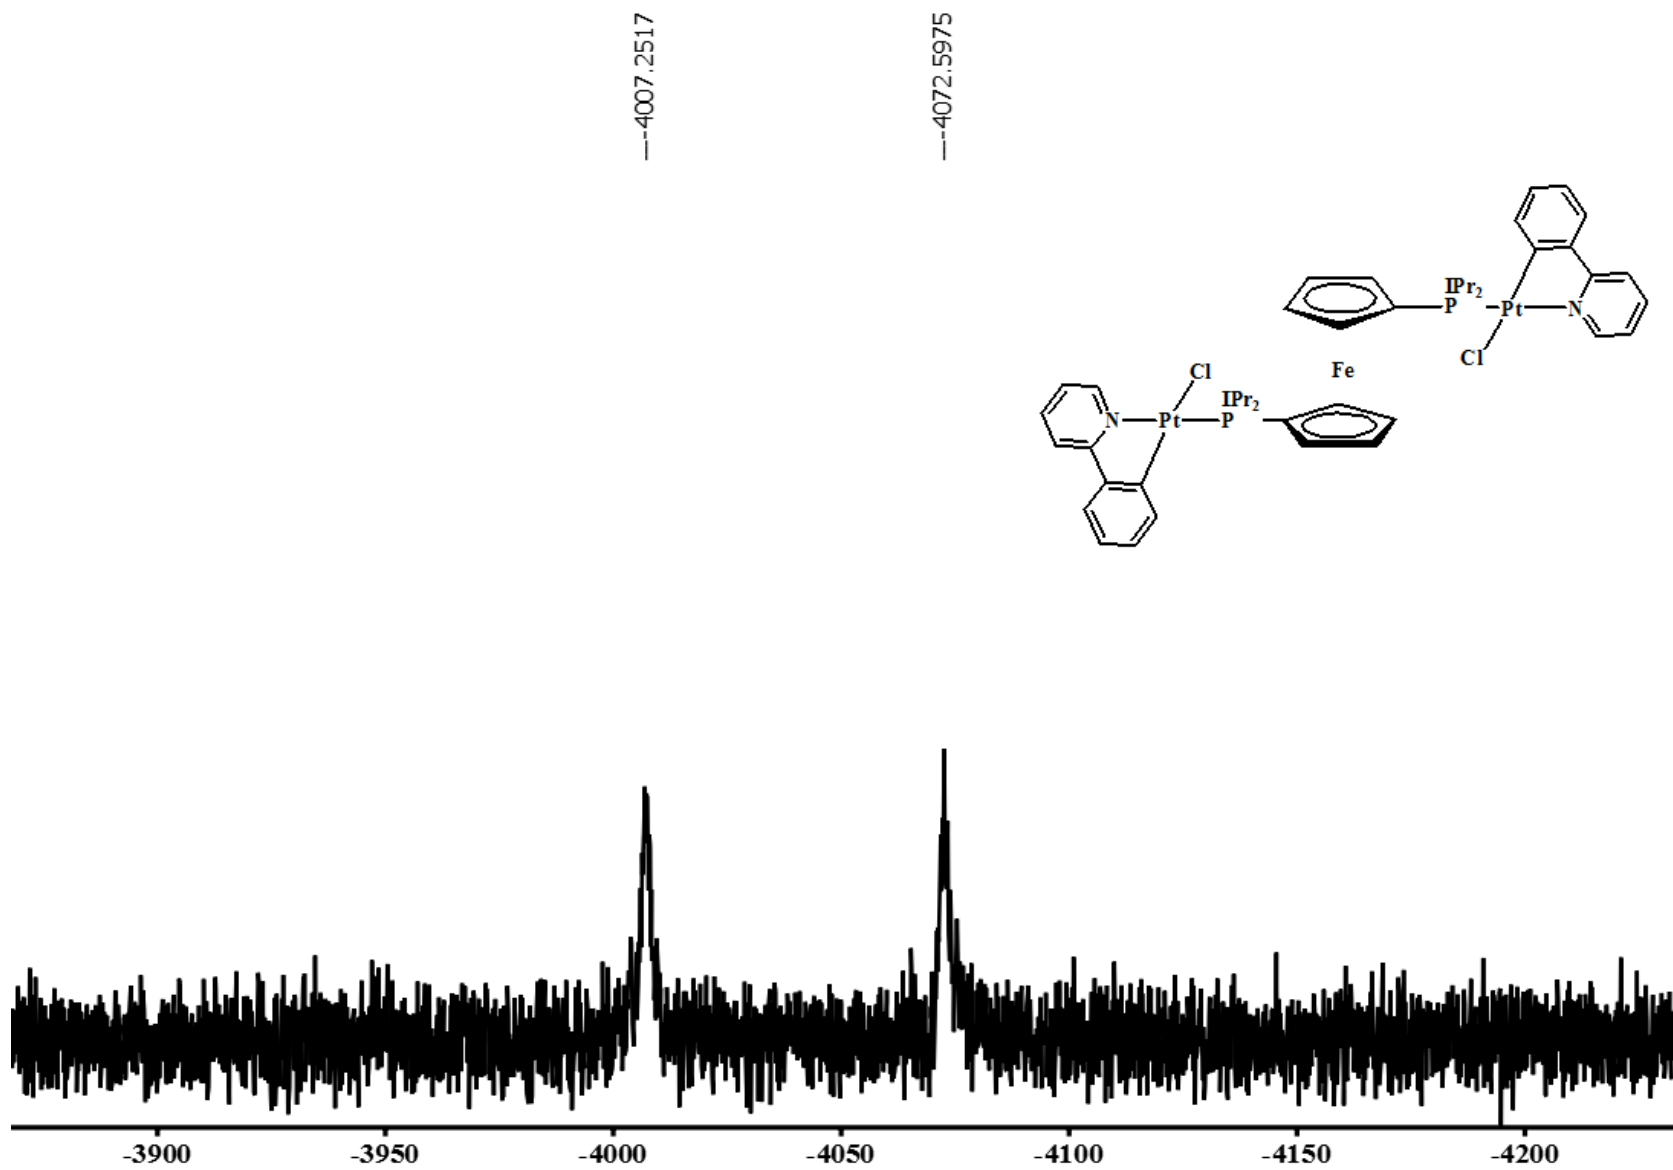

Figure S6.  $^{195}\text{Pt}\{^1\text{H}\}$  NMR spectrum of **2c** in  $\text{CDCl}_3$ .

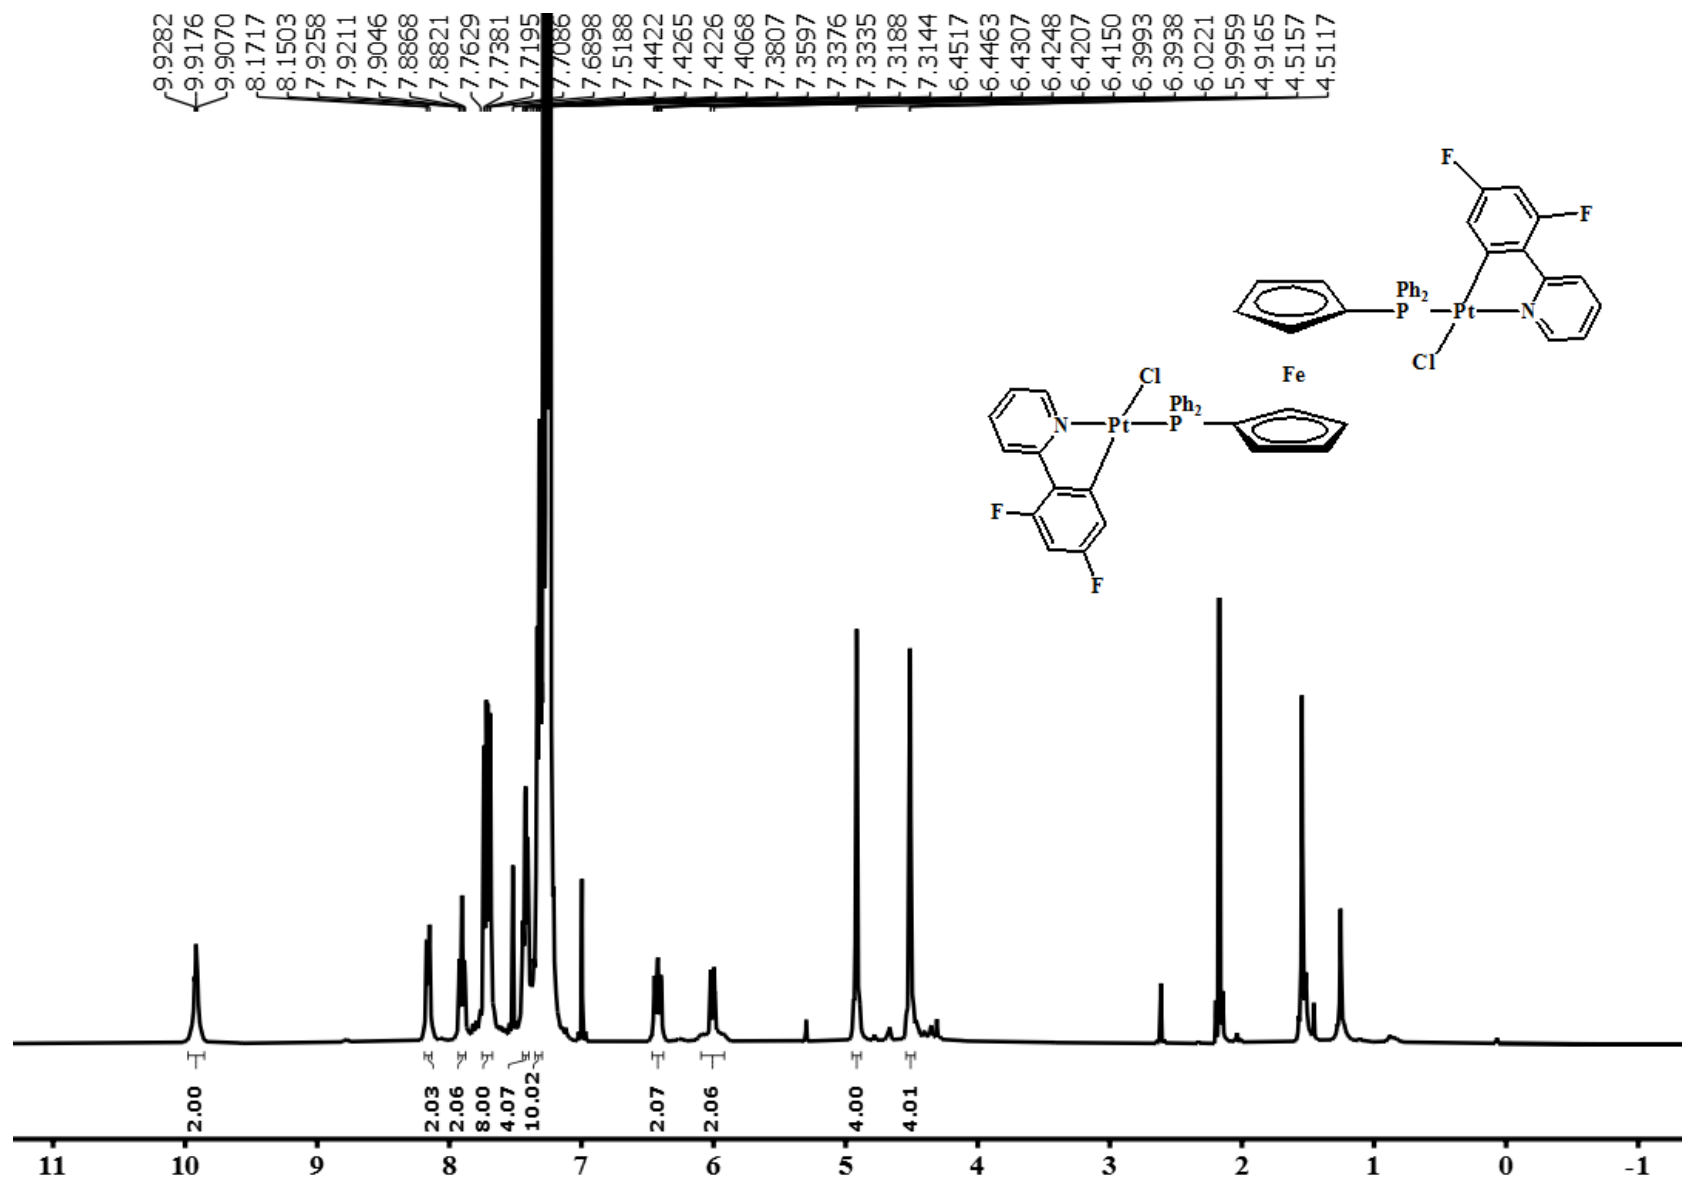

Figure S7.  $^1\text{H}$  NMR spectrum of **3a** in  $\text{CDCl}_3$ .



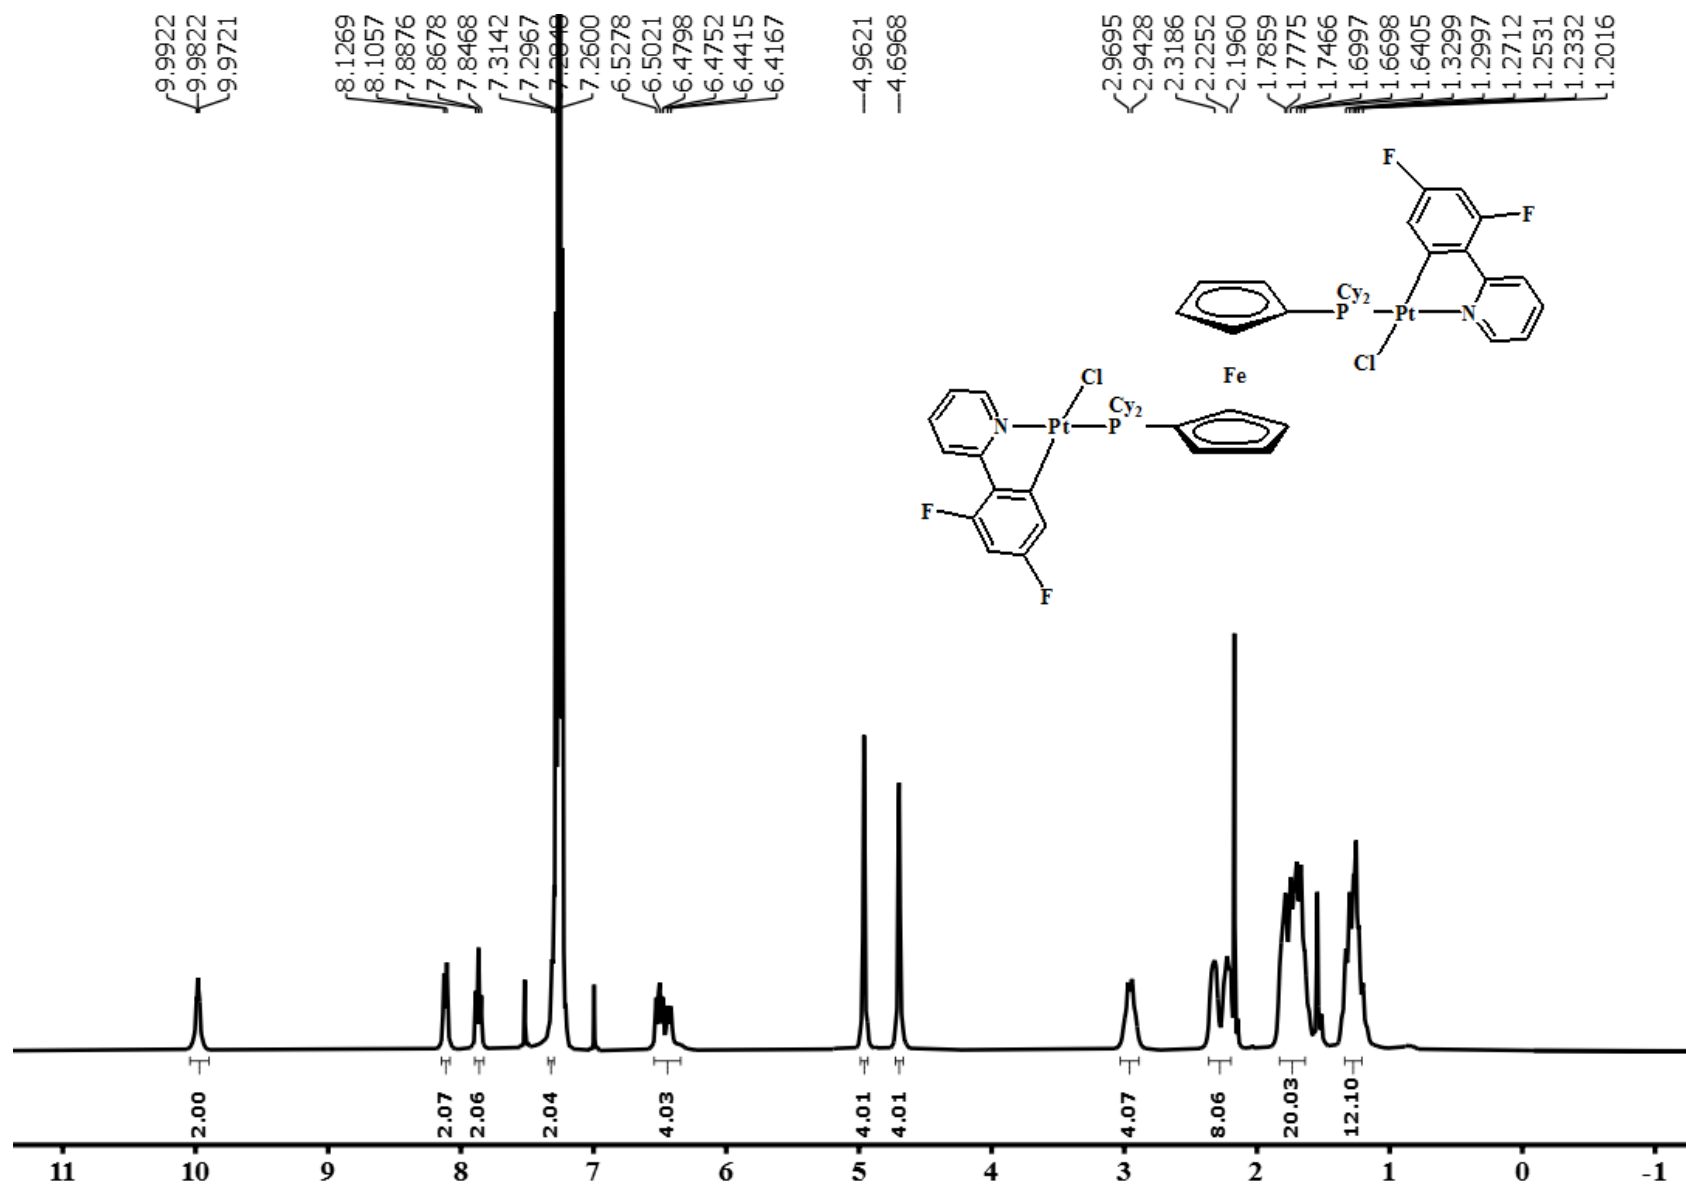

Figure S8.  $^1\text{H}$  NMR spectrum of **3b** in  $\text{CDCl}_3$ .

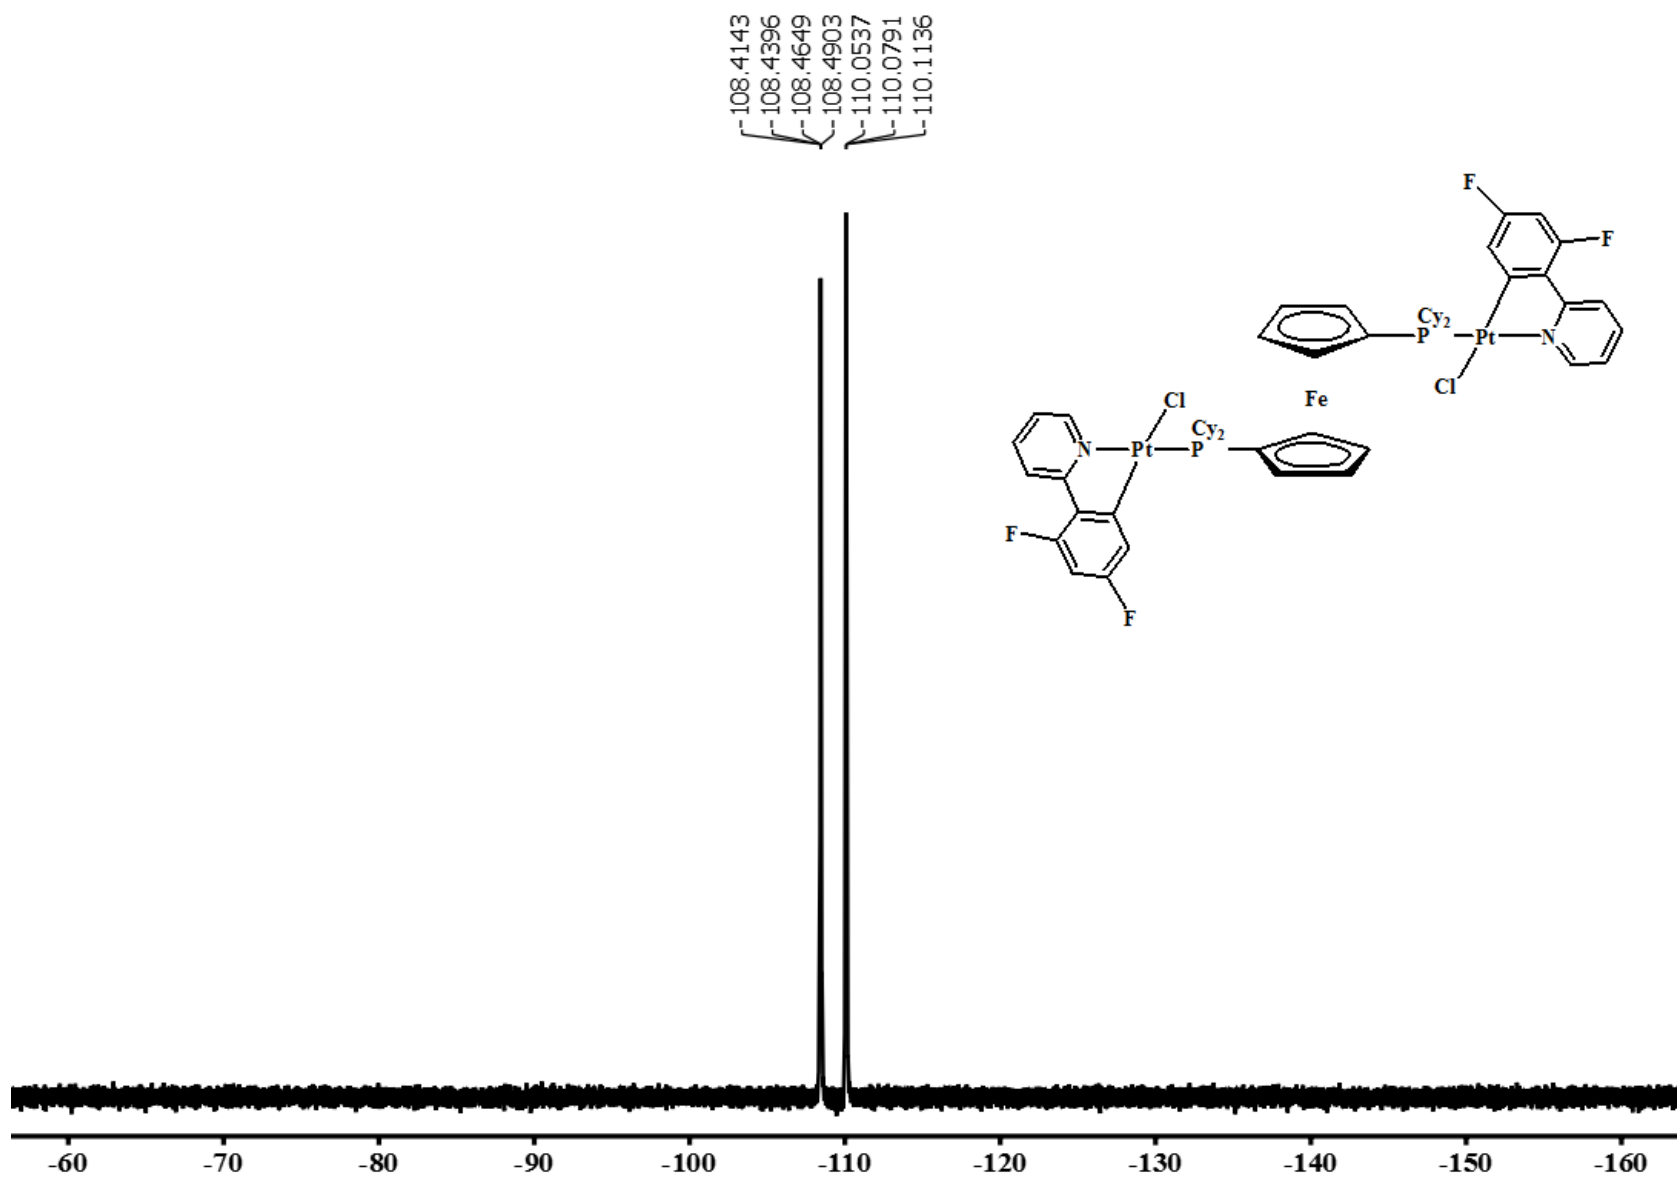

Figure S9.  $^{19}\text{F}$  NMR spectrum of **3b** in  $\text{CDCl}_3$ .

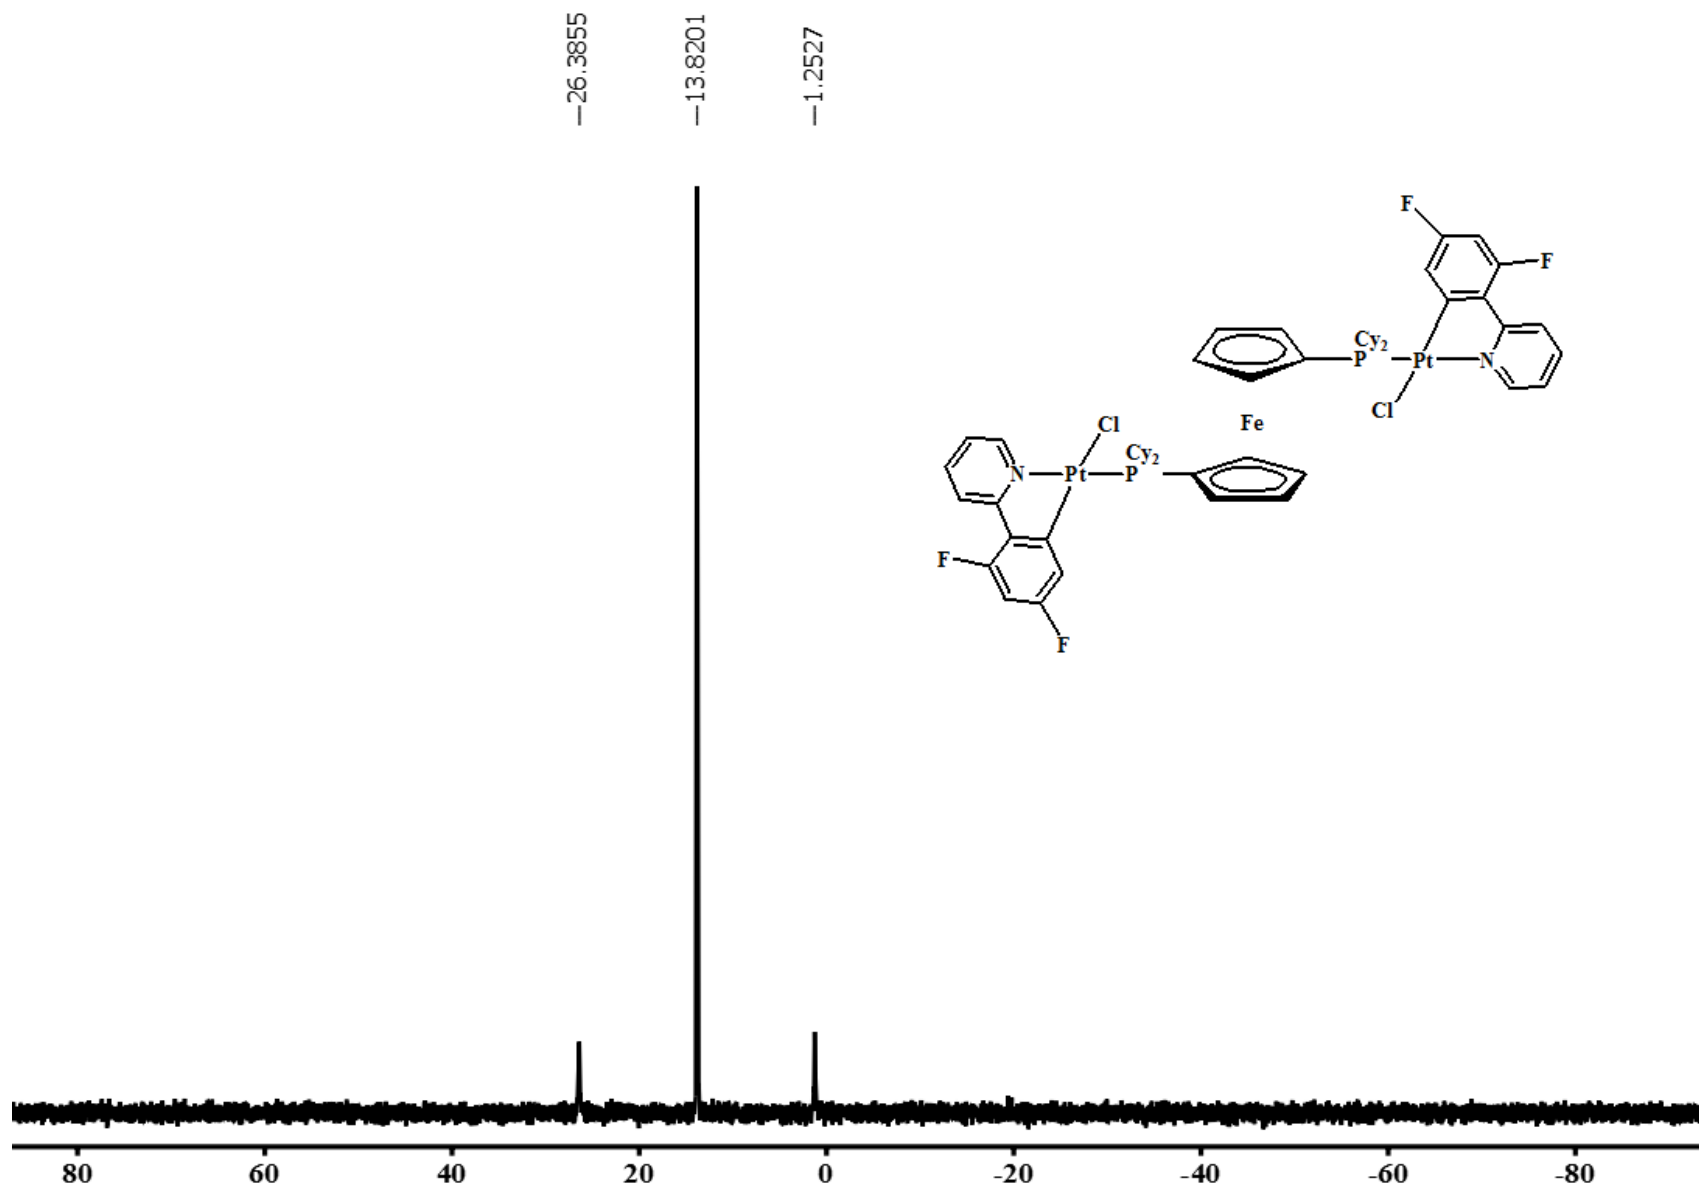

Figure S10.  $^{31}\text{P}\{^1\text{H}\}$  NMR spectrum of **3b** in  $\text{CDCl}_3$ .

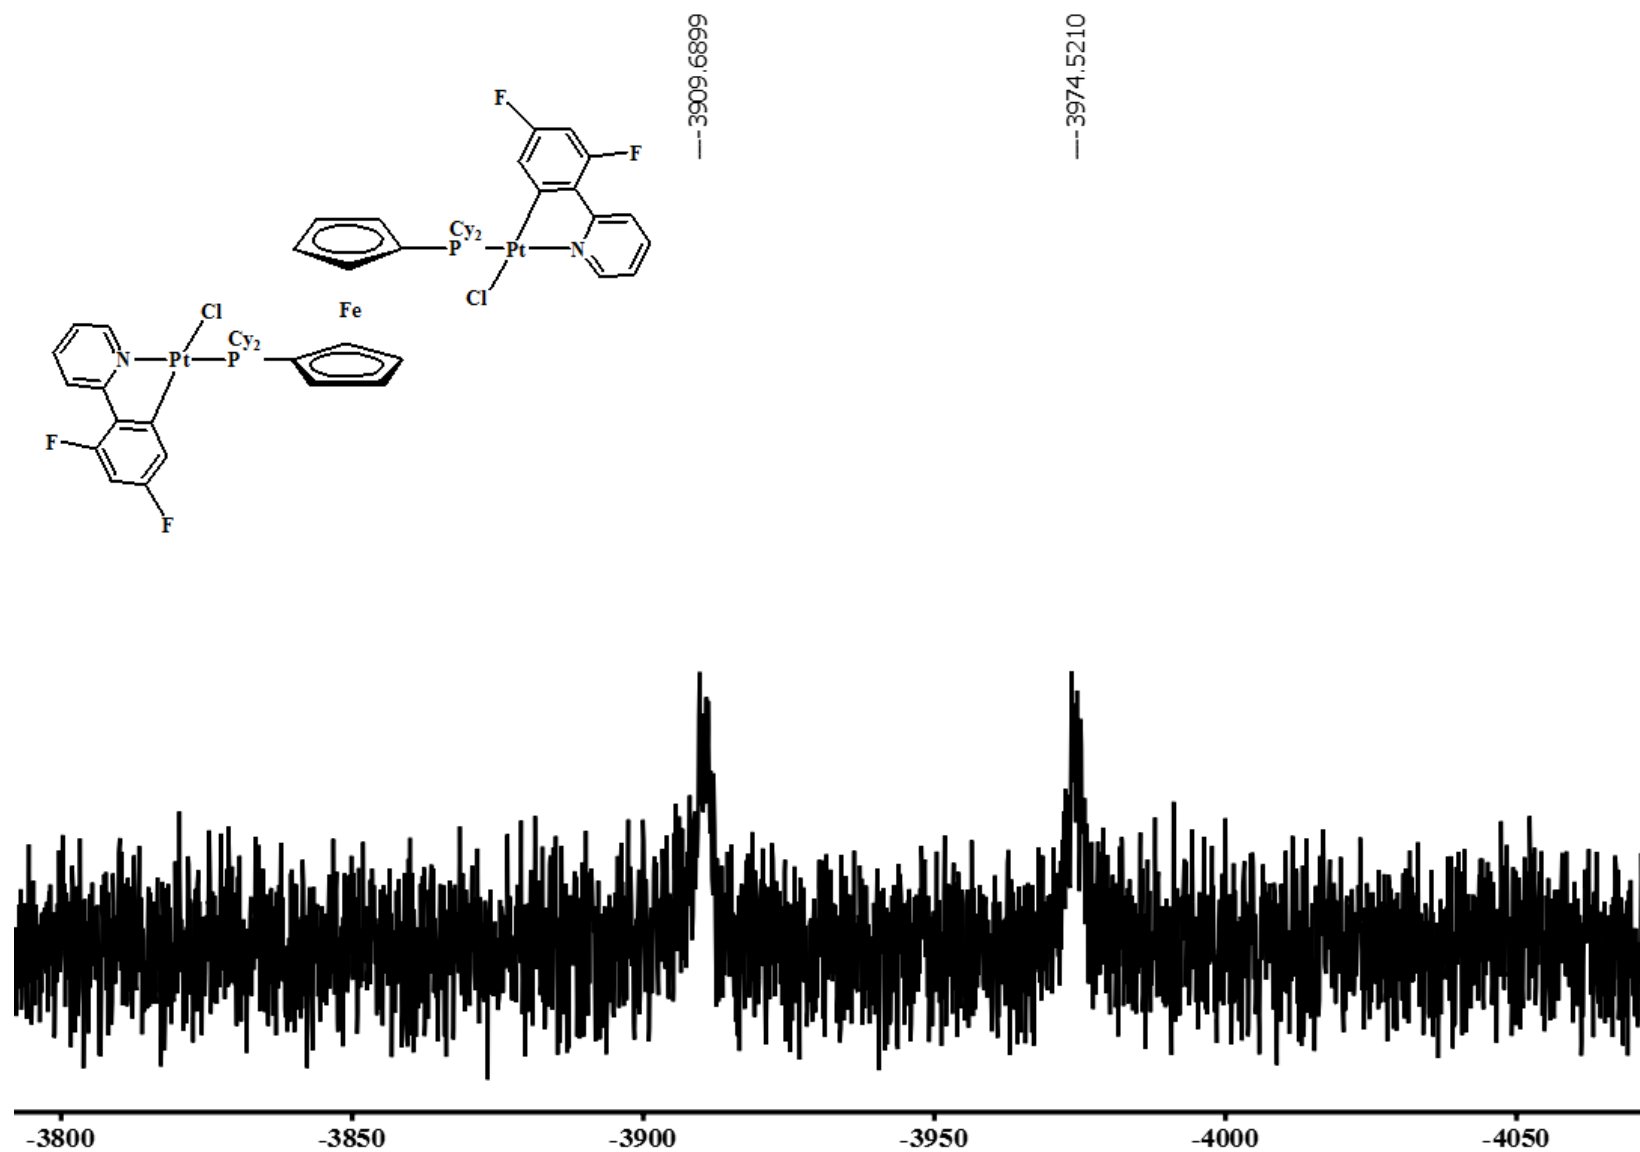

Figure S11.  $^{195}\text{Pt}\{^1\text{H}\}$  NMR spectrum of **3b** in  $\text{CDCl}_3$ .

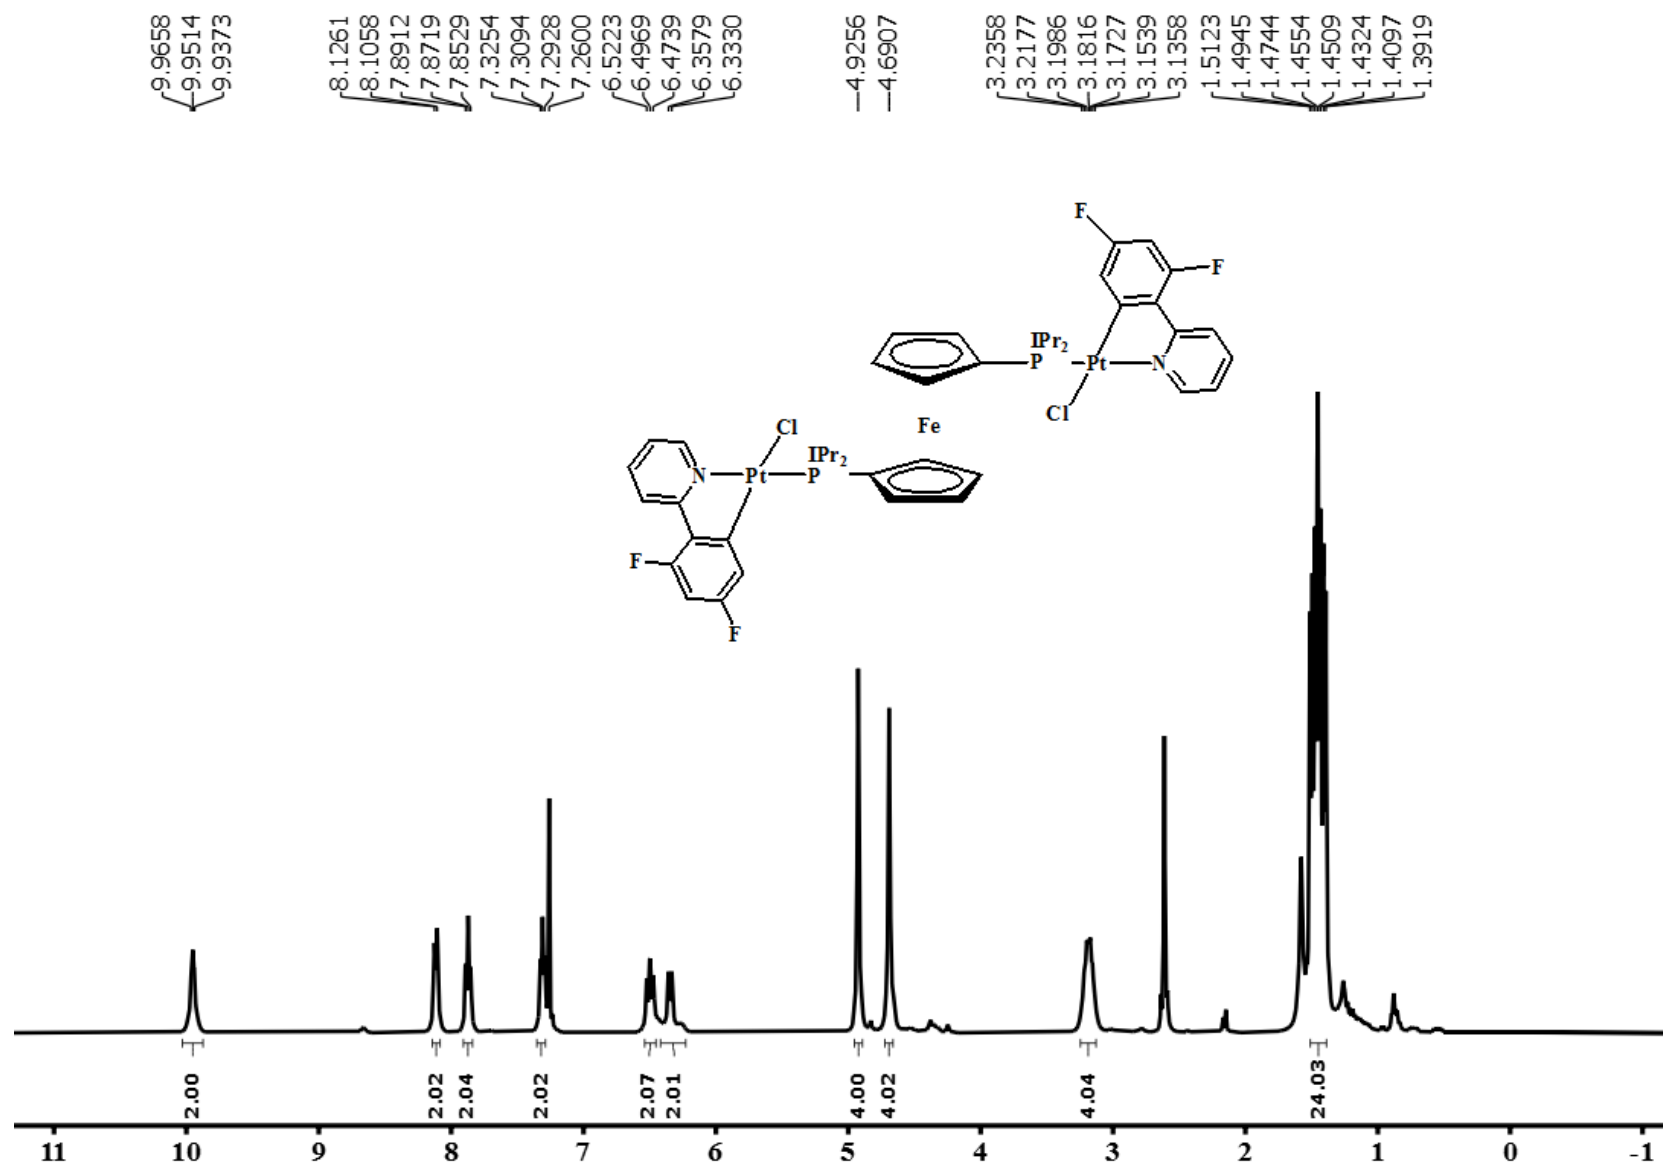

Figure S12.  $^1\text{H}$  NMR spectrum of **3c** in  $\text{CDCl}_3$ .

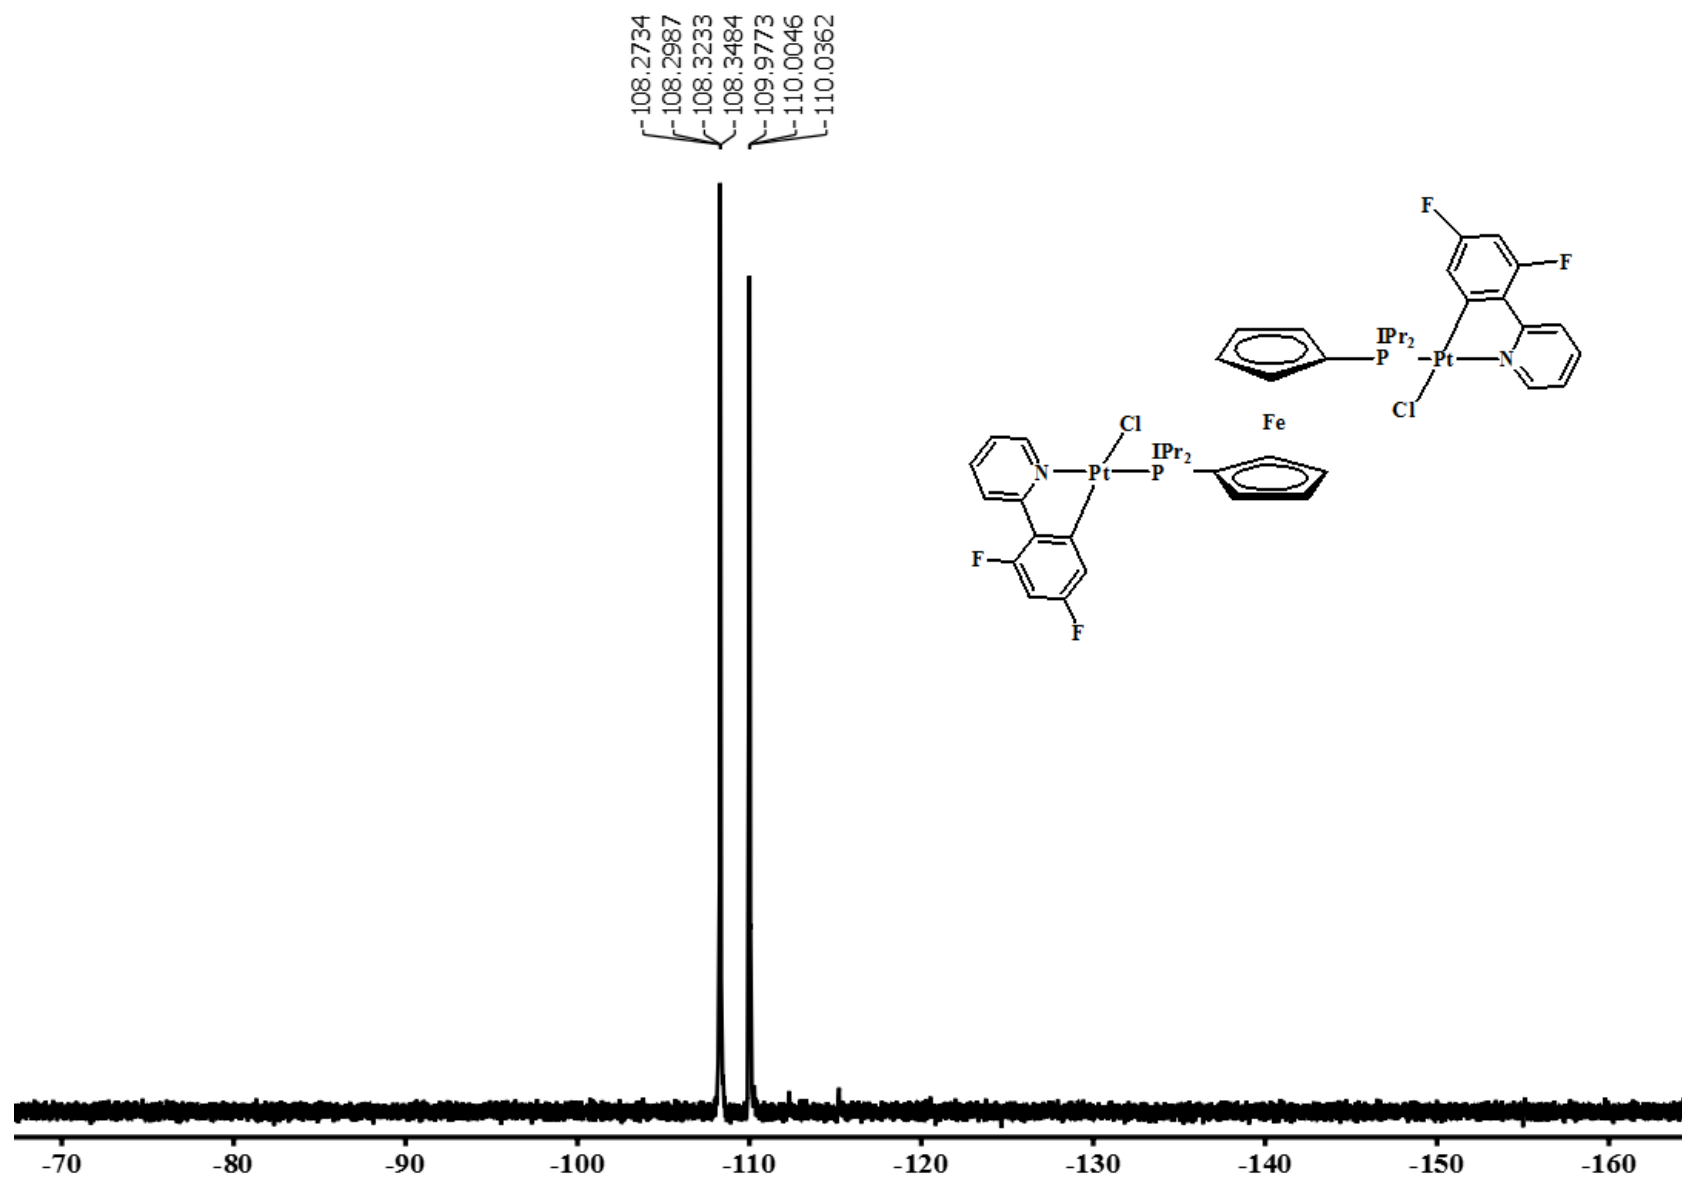

Figure S13.  $^{19}\text{F}$  NMR spectrum of **3c** in  $\text{CDCl}_3$ .

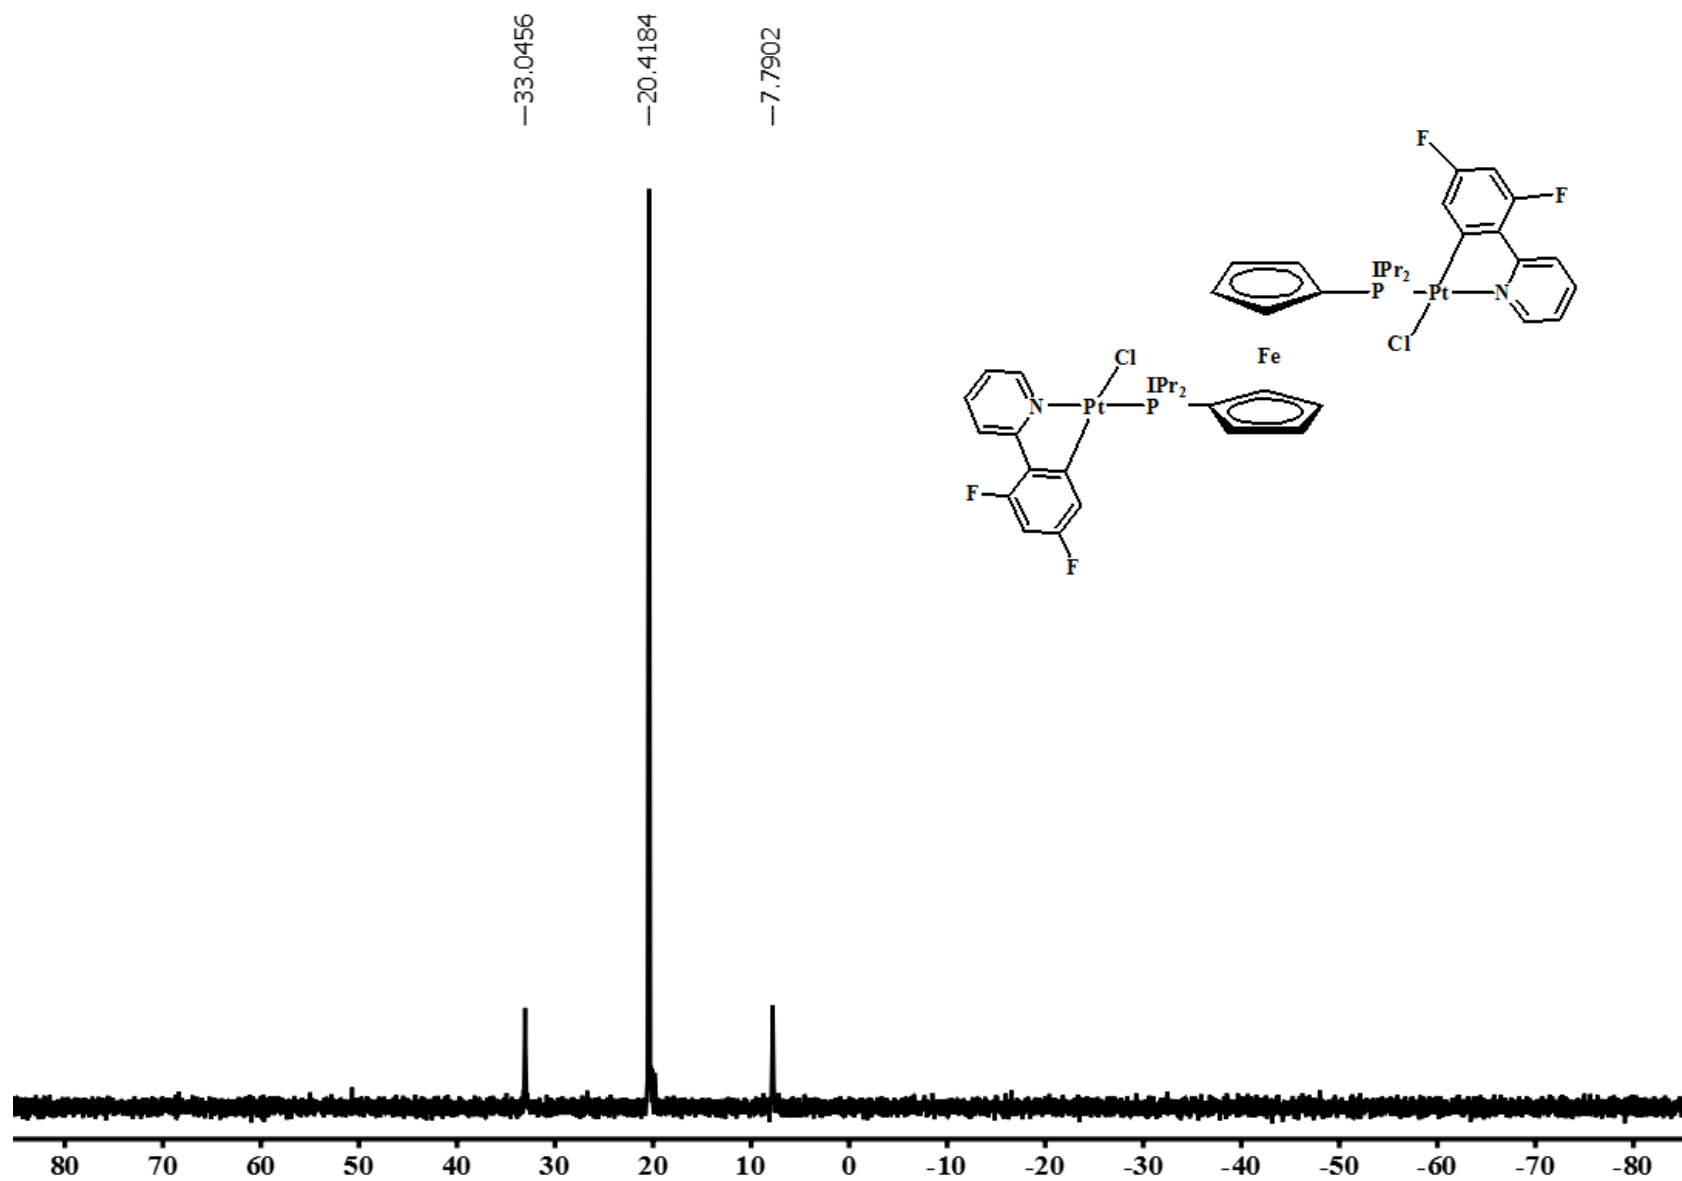

Figure S14.  $^{31}\text{P}\{^1\text{H}\}$  NMR spectrum of **3c** in  $\text{CDCl}_3$ .

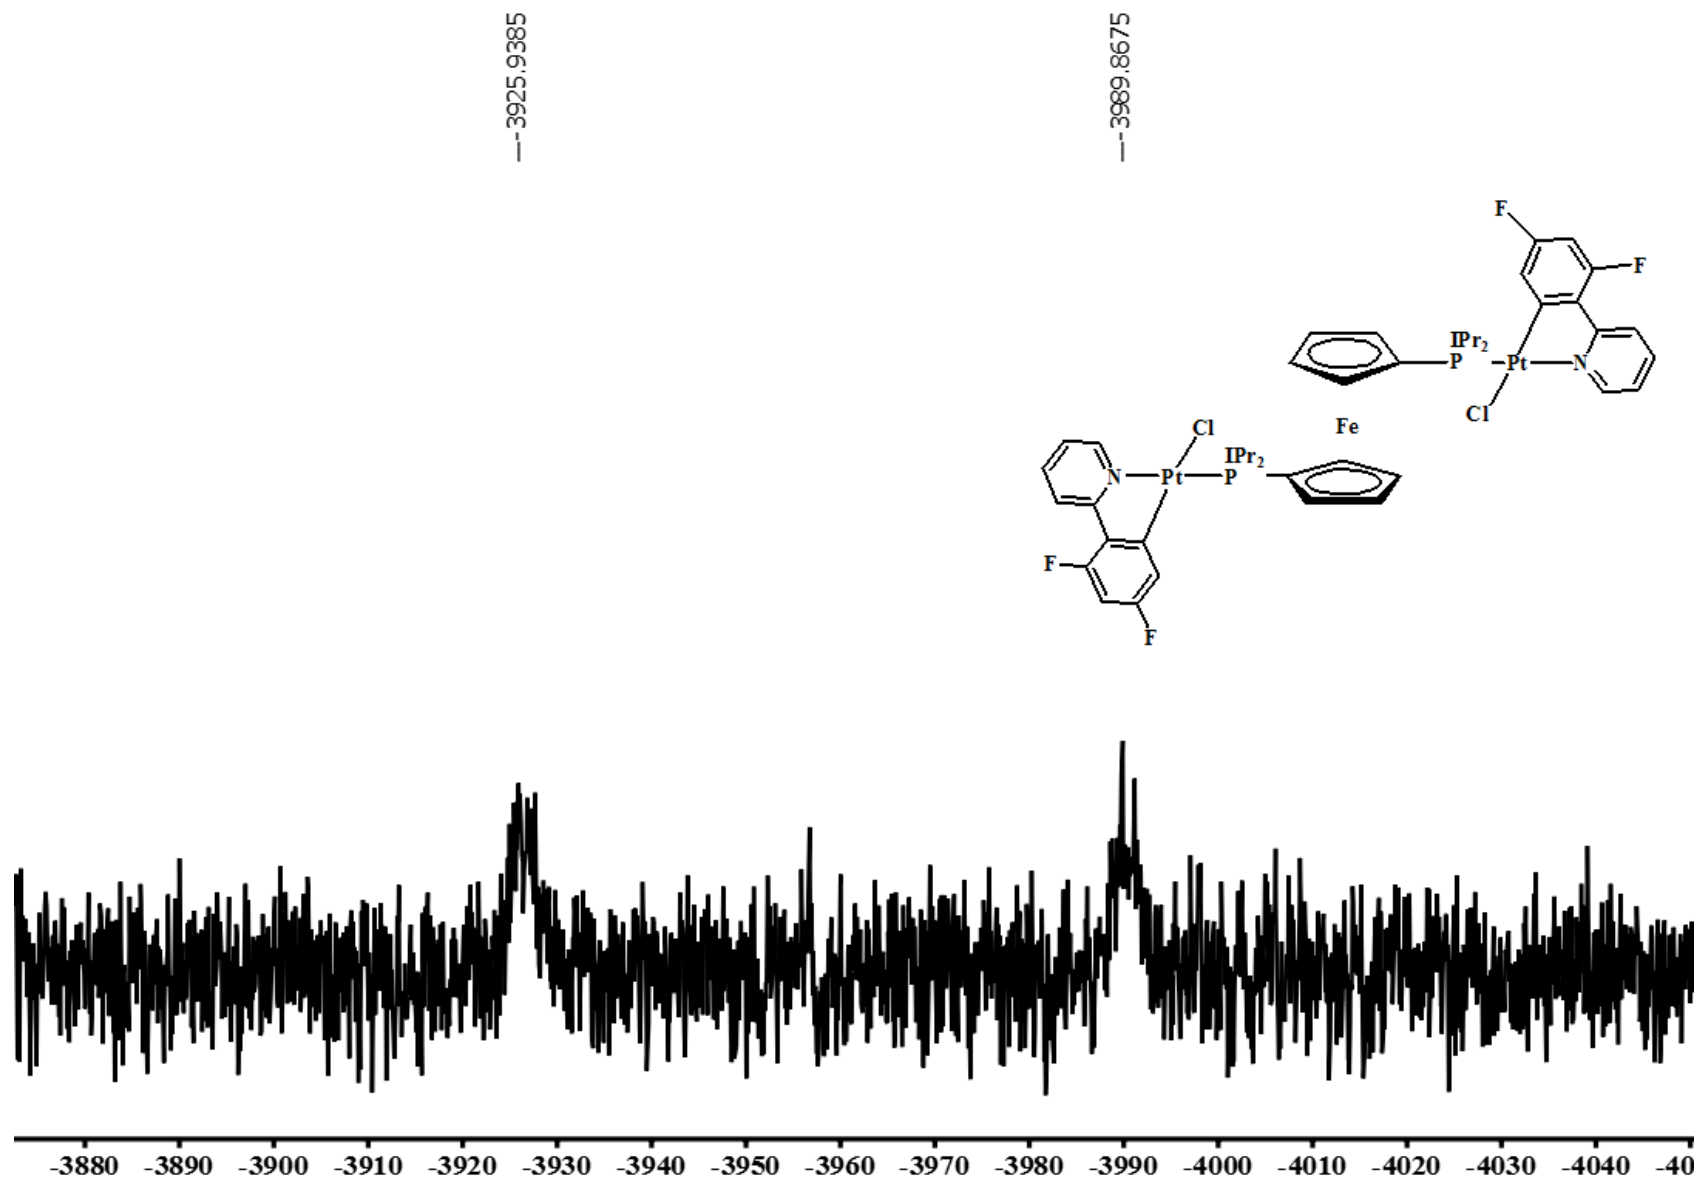

Figure S15.  $^{195}\text{Pt}\{^1\text{H}\}$  NMR spectrum of **3c** in  $\text{CDCl}_3$ .



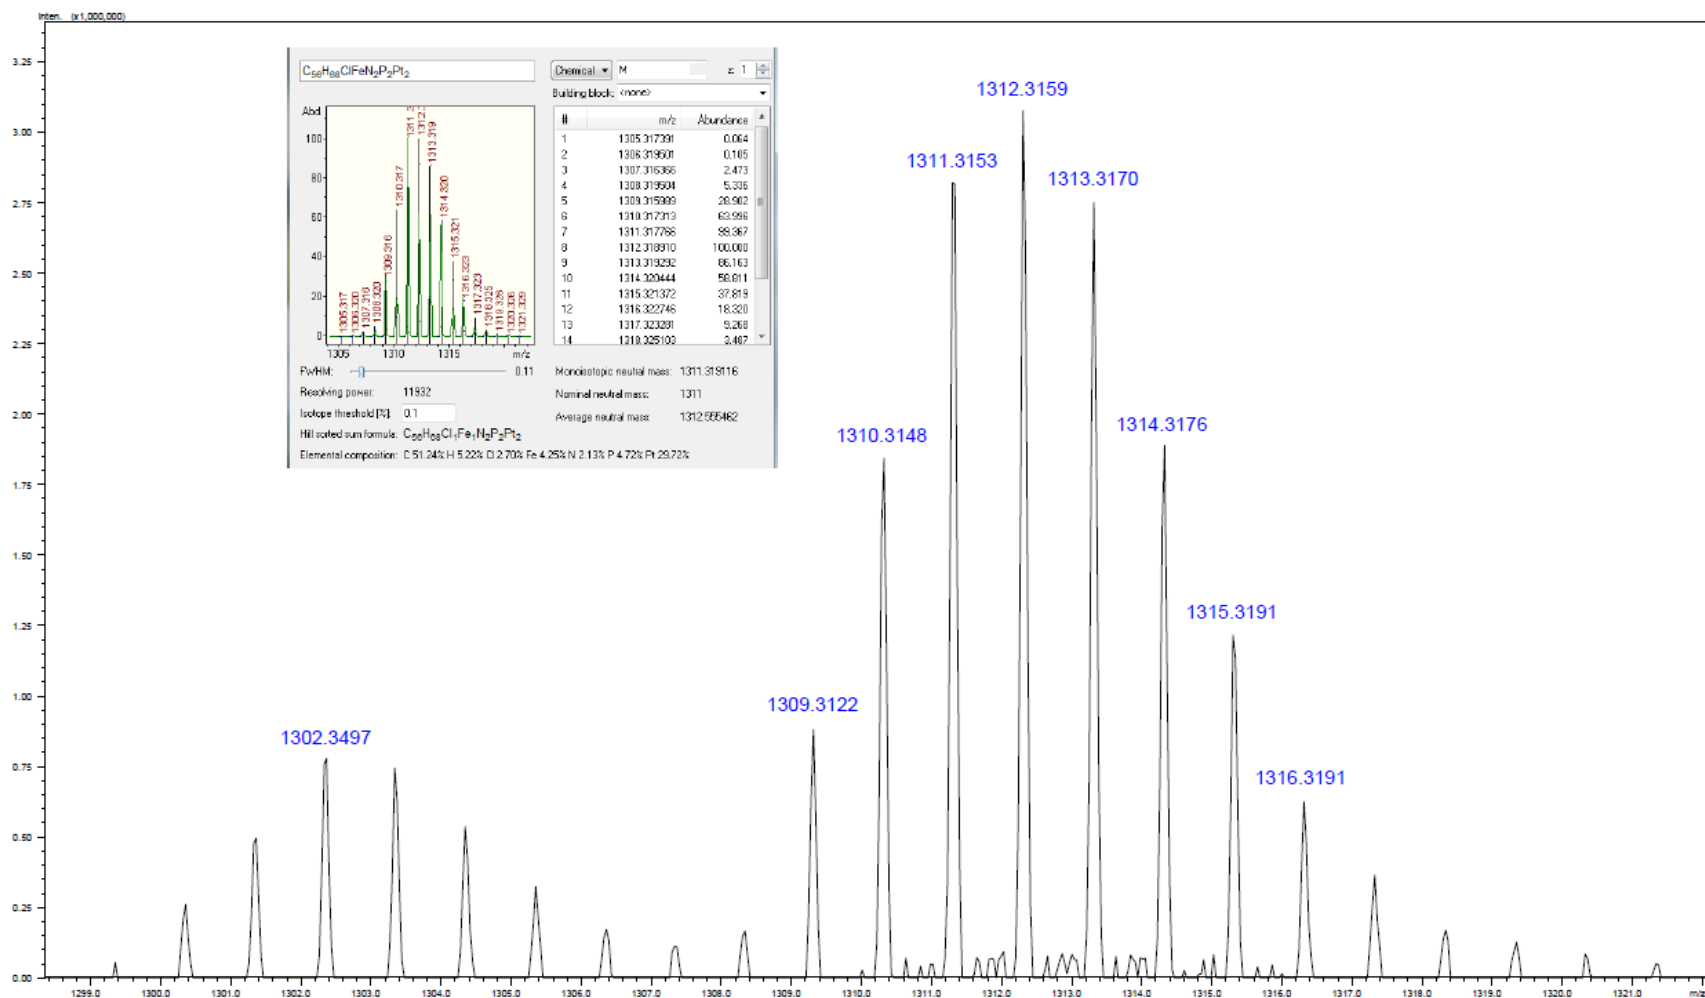

Figure S16. HR ESI Mass spectrum of **2b**. Inset shows the calculated pattern.

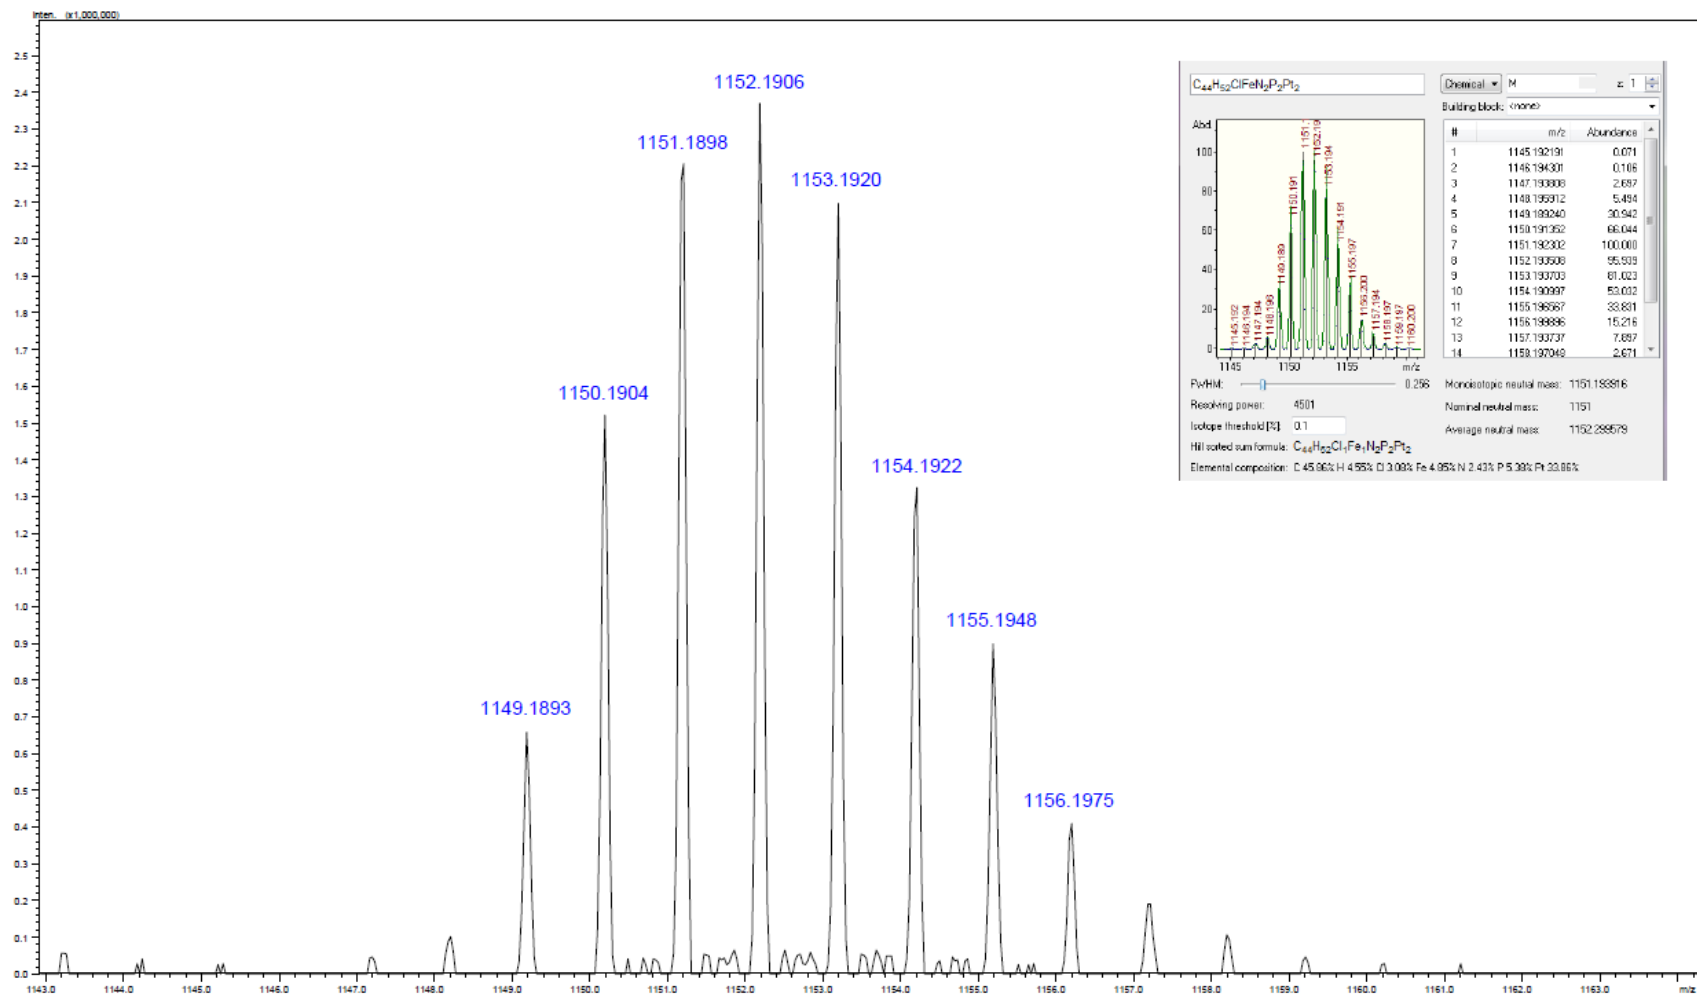

**Figure S17.** HR ESI Mass spectrum of **2c**. Inset shows the calculated pattern.

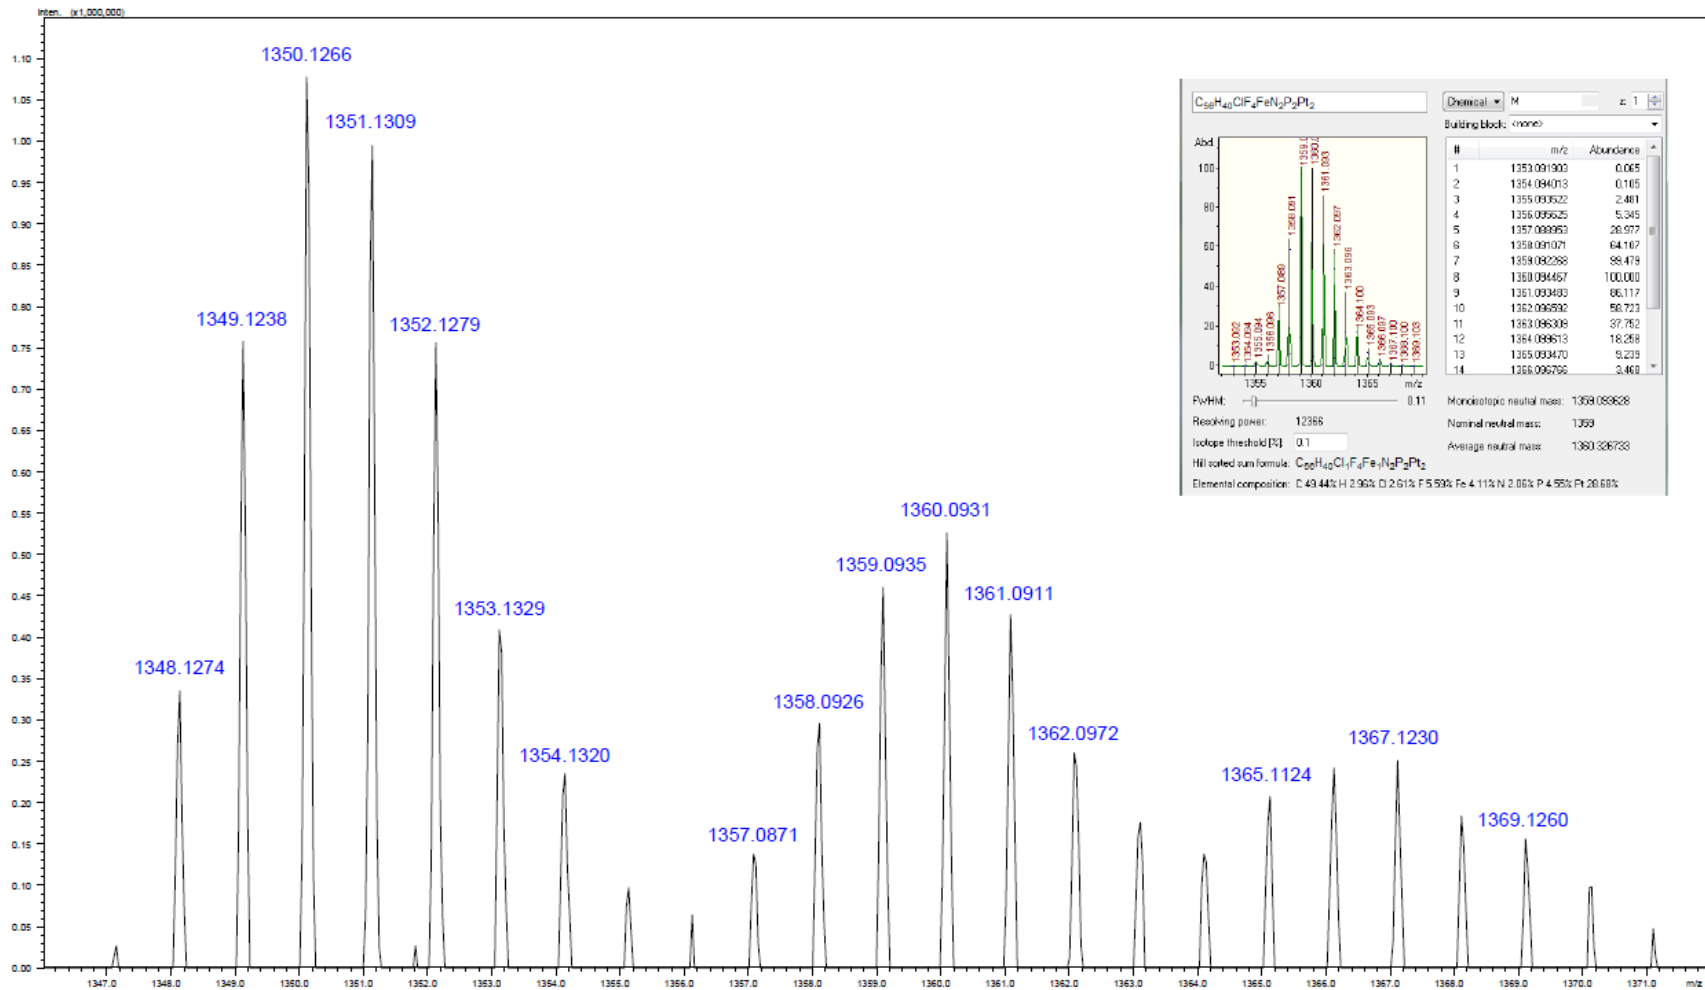

**Figure S18.** HR ESI Mass spectrum of **3a**. Inset shows the calculated pattern.

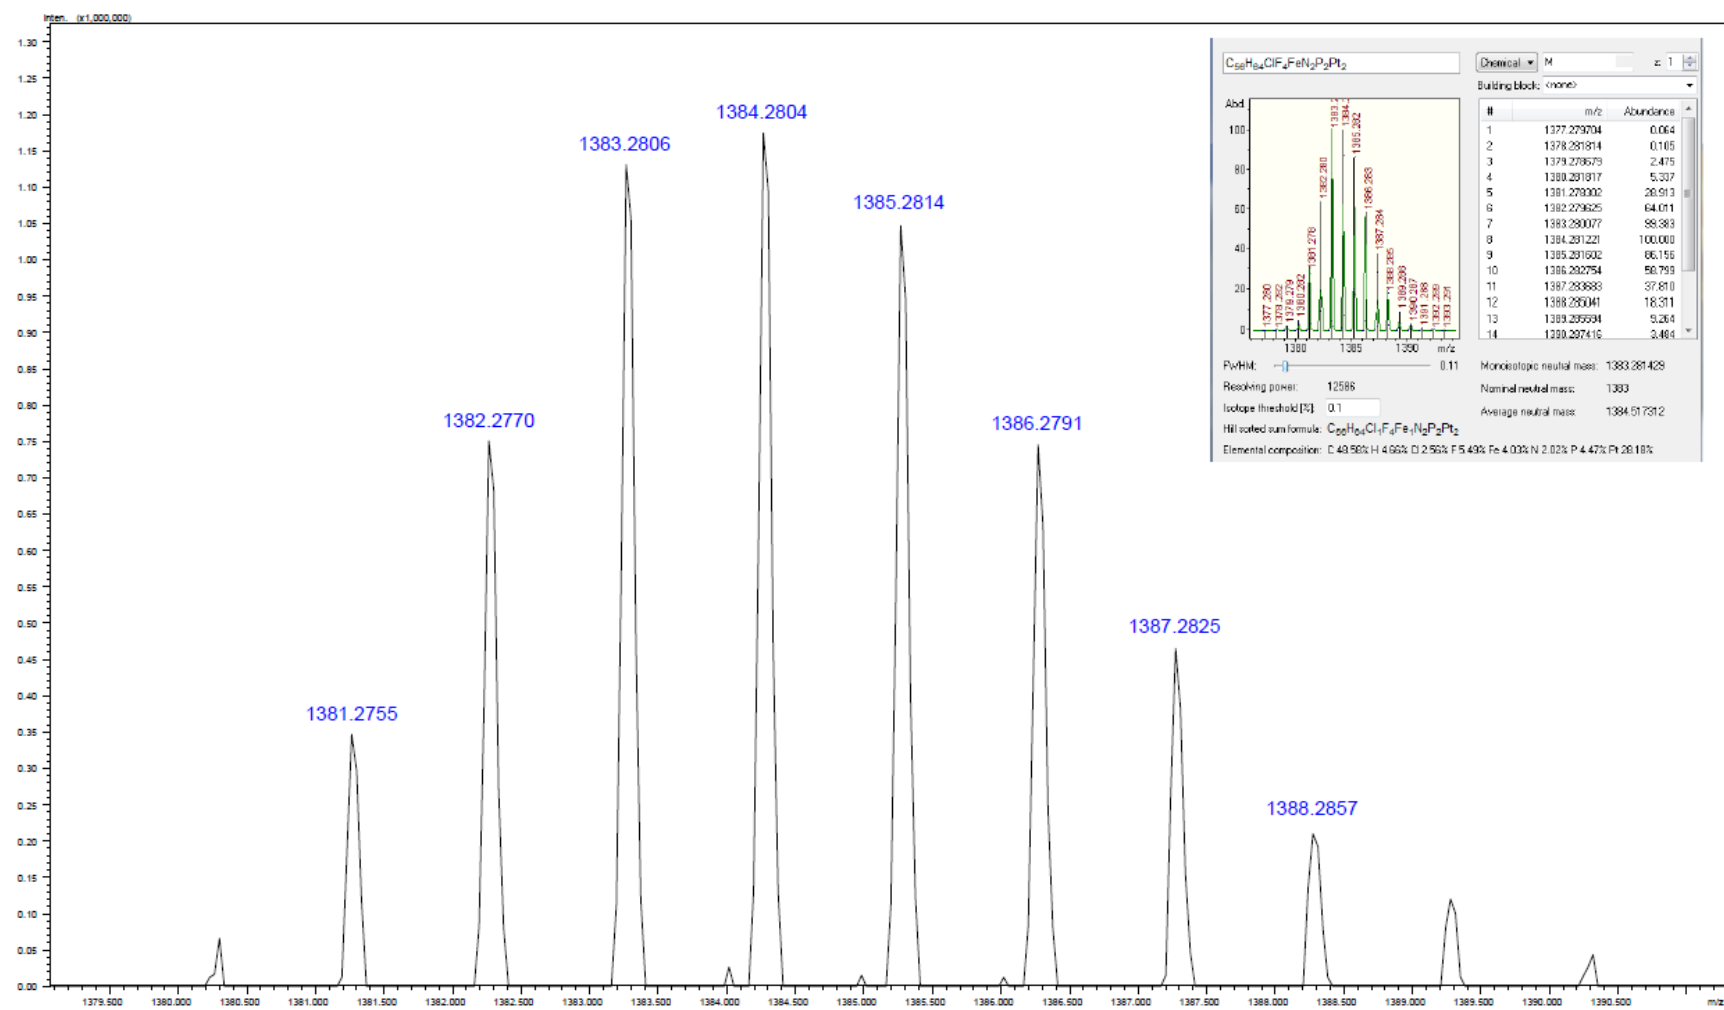

**Figure S19.** HR ESI Mass spectrum of **3b**. Inset shows the calculated pattern.

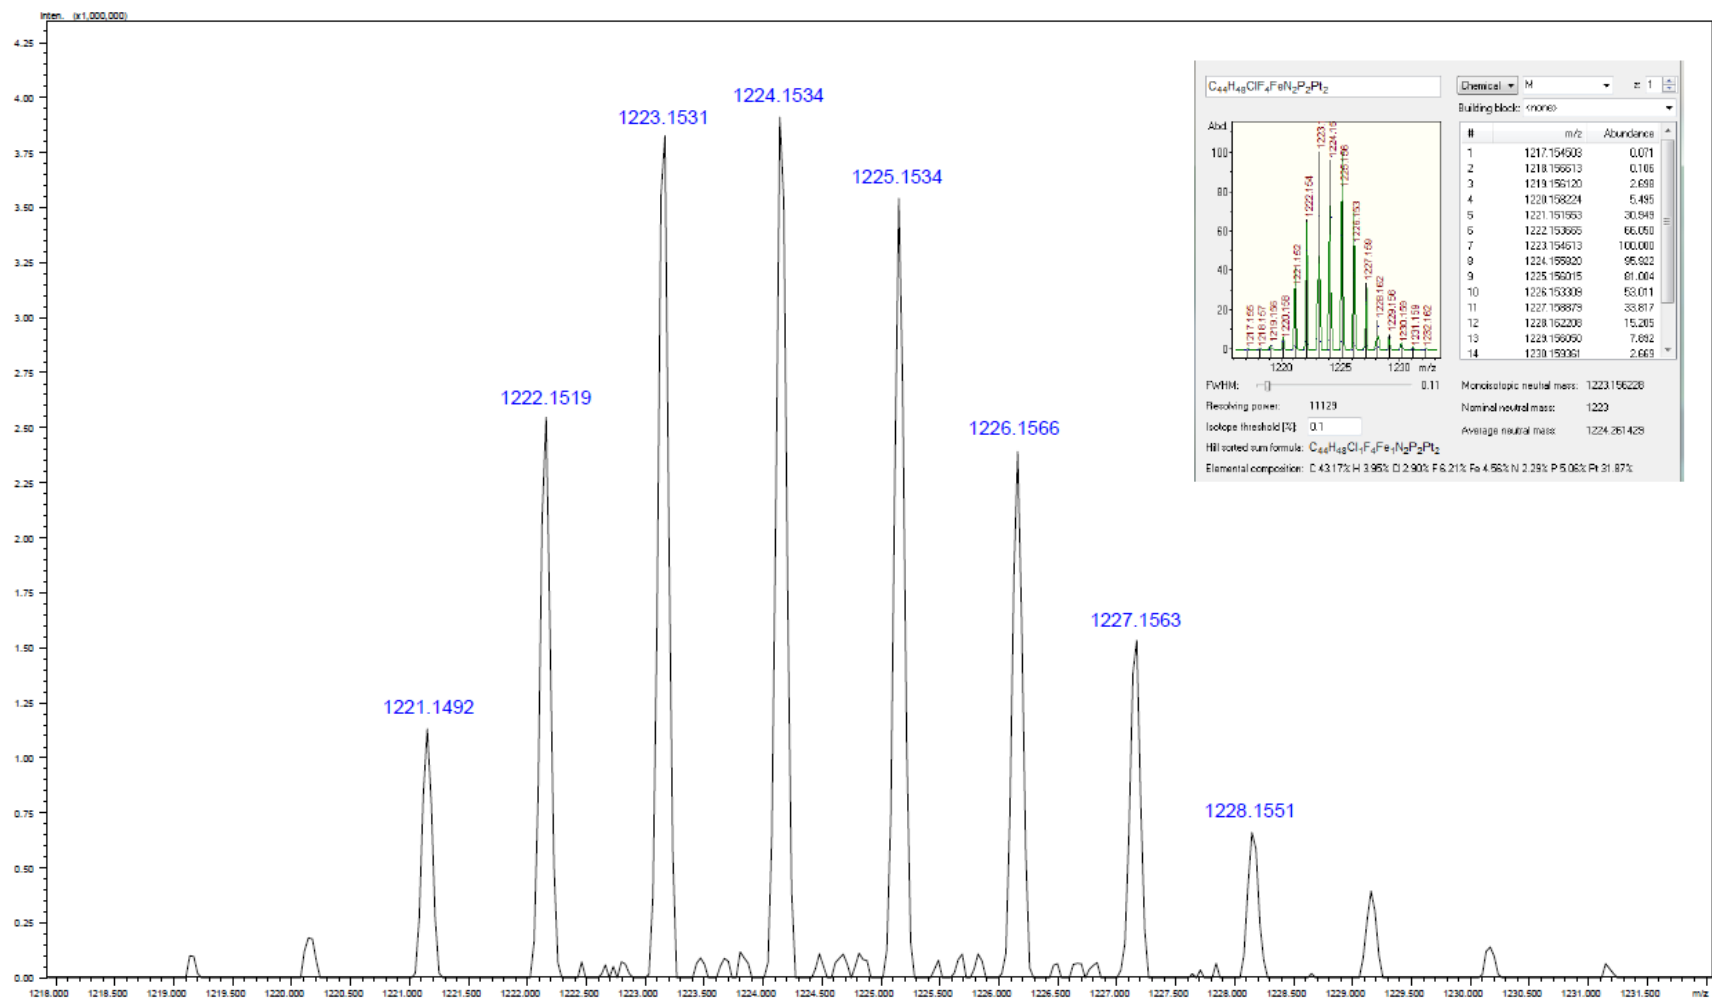

**Figure S20.** HR ESI Mass spectrum of **3c**. Inset shows the calculated pattern.

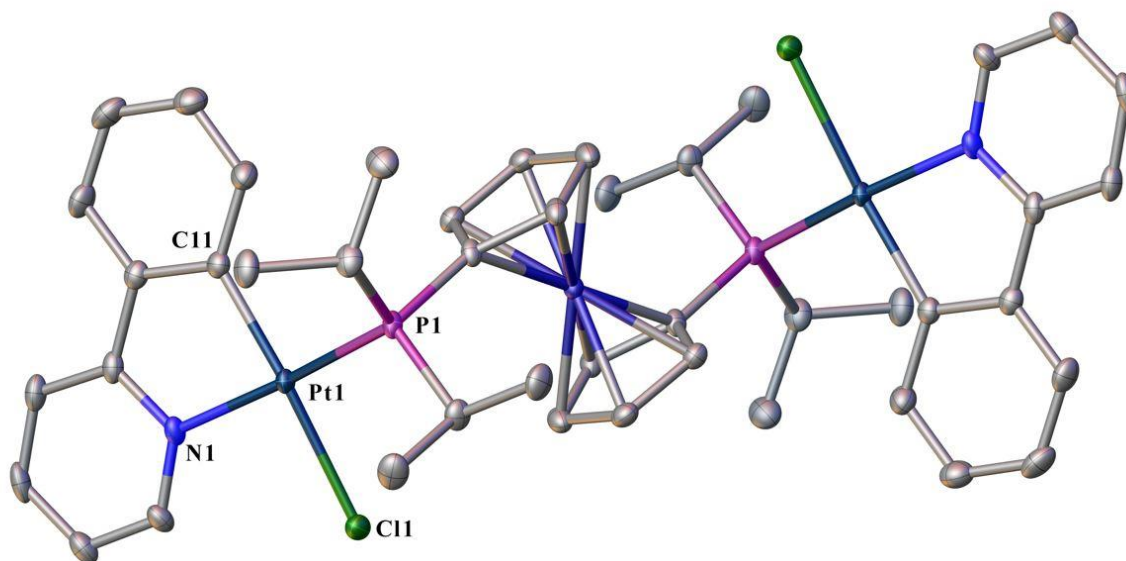

**Figure S21.** Molecular structure of **2c** in the solid state. Thermal ellipsoids are set at the 50% probability level. Hydrogen atoms have been omitted for clarity. Selected bond lengths [ $\text{\AA}$ ]: Pt1–C11=2.007 (3), Pt1–N1=2.096 (2), Pt1–P1=2.2589 (7), Pt1–Cl1=2.4051 (6). Details of crystal data, data collection and structure refinement are given in Table S2.

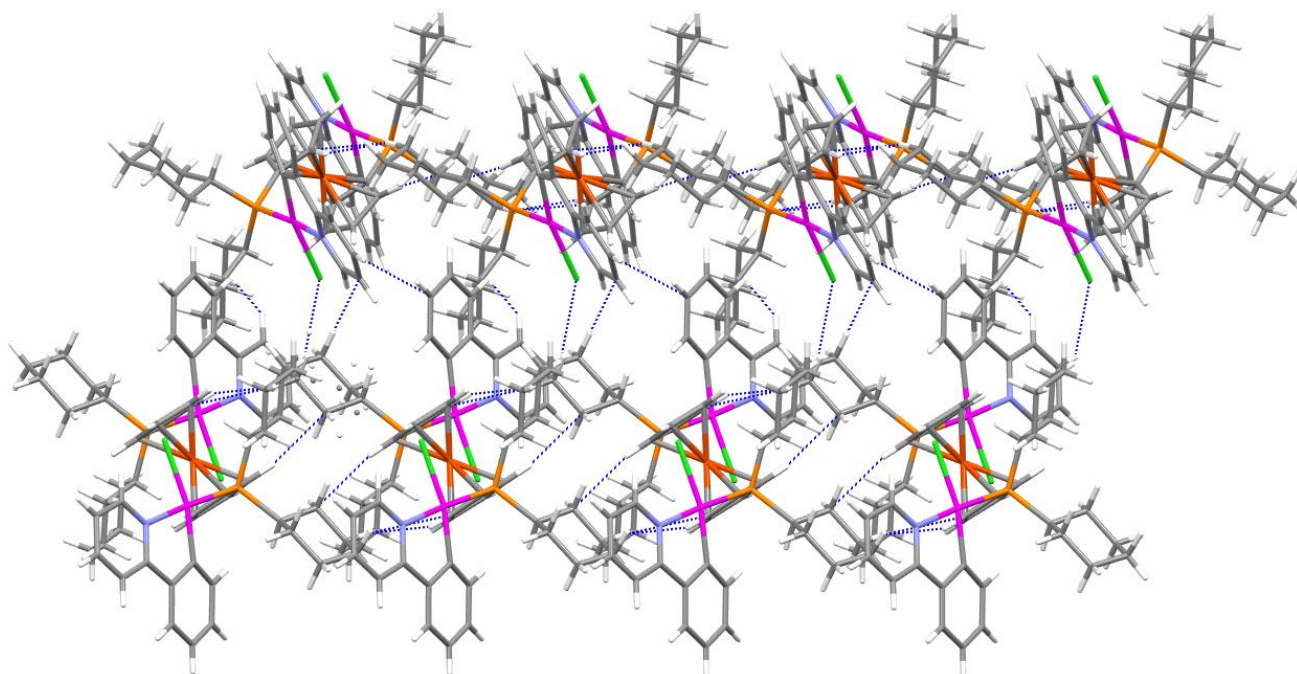

**Figure S22.** Crystal Packing of **2b**.

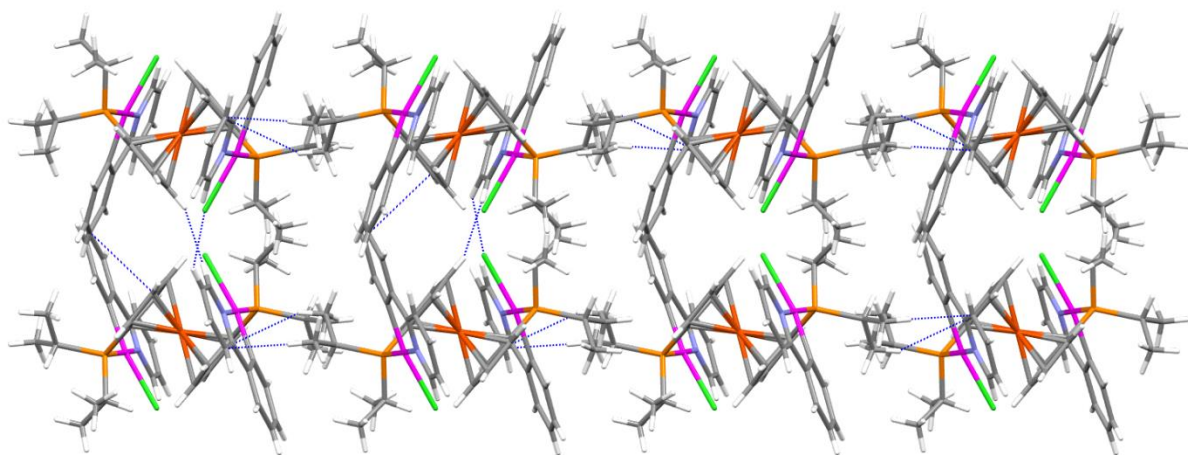

**Figure S23.** Crystal Packing of **2c**.

**Table S1.** Crystallographic and structure refinement data for **2b**.

|                                             |                                                                                                 |                        |
|---------------------------------------------|-------------------------------------------------------------------------------------------------|------------------------|
| Empirical formula                           | C <sub>56</sub> H <sub>68</sub> Cl <sub>2</sub> FeN <sub>2</sub> P <sub>2</sub> Pt <sub>2</sub> |                        |
|                                             | Formula weight                                                                                  | 1348.007               |
| Crystal system                              | Monoclinic                                                                                      |                        |
| Space group                                 | P2 <sub>1</sub> /n                                                                              |                        |
| Unit cell dimensions                        | <i>a</i> = 9.0061(8) Å                                                                          | <i>α</i> = 90°         |
|                                             | <i>b</i> = 30.535(3) Å                                                                          | <i>β</i> = 109.756(3)° |
|                                             | <i>c</i> = 10.3235(9) Å                                                                         | <i>γ</i> = 90°         |
| Volume                                      | 2671.9(4) Å <sup>3</sup>                                                                        |                        |
| Z, Z'                                       | 2, 0.5                                                                                          |                        |
| Density (calculated)                        | 1.764 Mg/m <sup>3</sup>                                                                         |                        |
| Wavelength                                  | 0.71073 Å                                                                                       |                        |
| Temperature                                 | 100(2) K                                                                                        |                        |
| <i>F</i> (000)                              | 1396                                                                                            |                        |
| Absorption coefficient                      | 5.790 mm <sup>-1</sup>                                                                          |                        |
| Absorption correction                       | semi-empirical from equivalents                                                                 |                        |
| Max. and min. transmission                  | 0.5699 and 0.3317                                                                               |                        |
| Theta range for data collection             | 2.485 to 28.282°                                                                                |                        |
| Reflections collected                       | 45950                                                                                           |                        |
| Independent reflections                     | 6599 [R(int) = 0.0501]                                                                          |                        |
| Data / restraints / parameters              | 6599 / 87 / 344                                                                                 |                        |
| <i>wR</i> ( <i>F</i> <sup>2</sup> all data) | <i>wR</i> 2 = 0.0639                                                                            |                        |
| <i>R</i> ( <i>F</i> obsd data)              | <i>R</i> 1 = 0.0248                                                                             |                        |
| Goodness-of-fit on <i>F</i> <sup>2</sup>    | 1.007                                                                                           |                        |
| Observed data [ <i>I</i> > 2σ( <i>I</i> )]  | 6295                                                                                            |                        |
| Largest and mean shift / s.u.               | 0.004 and 0.000                                                                                 |                        |
| Largest diff. peak and hole                 | 1.236 and -1.286 e/Å <sup>3</sup>                                                               |                        |

-----

$$wR2 = \{ \sum [w(F_o^2 - F_c^2)^2] / \sum [w(F_o^2)^2] \}^{1/2}$$

$$R1 = \sum ||F_o| - |F_c|| / \sum |F_o|$$



**Table S2.** Crystallographic and structure refinement data for **2c**.

|                                 |                                                                                                 |                     |
|---------------------------------|-------------------------------------------------------------------------------------------------|---------------------|
| Empirical formula               | C <sub>44</sub> H <sub>52</sub> Cl <sub>2</sub> FeN <sub>2</sub> P <sub>2</sub> Pt <sub>2</sub> |                     |
| Formula weight                  | 1187.74                                                                                         |                     |
| Crystal system                  | orthorhombic                                                                                    |                     |
| Space group                     | <i>Pbca</i>                                                                                     |                     |
| Unit cell dimensions            | $a = 14.8443(4) \text{ \AA}$                                                                    | $\alpha = 90^\circ$ |
|                                 | $b = 12.8796(4) \text{ \AA}$                                                                    | $\beta = 90^\circ$  |
|                                 | $c = 20.9625(7) \text{ \AA}$                                                                    | $\gamma = 90^\circ$ |
| Volume                          | 4007.8(2) $\text{\AA}^3$                                                                        |                     |
| Z                               | 4                                                                                               |                     |
| Density (calculated)            | 1.968 Mg/m <sup>3</sup>                                                                         |                     |
| Wavelength                      | 0.71073 $\text{\AA}$                                                                            |                     |
| Temperature                     | 100(2) K                                                                                        |                     |
| $F(000)$                        | 2304                                                                                            |                     |
| Absorption coefficient          | 7.570 mm <sup>-1</sup>                                                                          |                     |
| Absorption correction           | semi-empirical from equivalents                                                                 |                     |
| Max. and min. transmission      | 0.713 and 0.297                                                                                 |                     |
| Theta range for data collection | 2.308 to 28.694°                                                                                |                     |
| Reflections collected           | 33429                                                                                           |                     |
| Independent reflections         | 5176 [R(int) = 0.0361]                                                                          |                     |
| Data / restraints / parameters  | 5176 / 0 / 241                                                                                  |                     |
| $wR(F^2 \text{ all data})$      | $wR2 = 0.0601$                                                                                  |                     |
| $R(F \text{ obsd data})$        | $R1 = 0.0213$                                                                                   |                     |
| Goodness-of-fit on $F^2$        | 1.005                                                                                           |                     |
| Observed data [I > 2σ(I)]       | 4998                                                                                            |                     |
| Largest and mean shift / s.u.   | 0.002 and 0.000                                                                                 |                     |
| Largest diff. peak and hole     | 1.330 and -1.374 e/ $\text{\AA}^3$                                                              |                     |

-----

$$wR2 = \{ \sum [w(F_o^2 - F_c^2)^2] / \sum [w(F_o^2)^2] \}^{1/2}$$

$$R1 = \sum ||F_o| - |F_c|| / \sum |F_o|$$

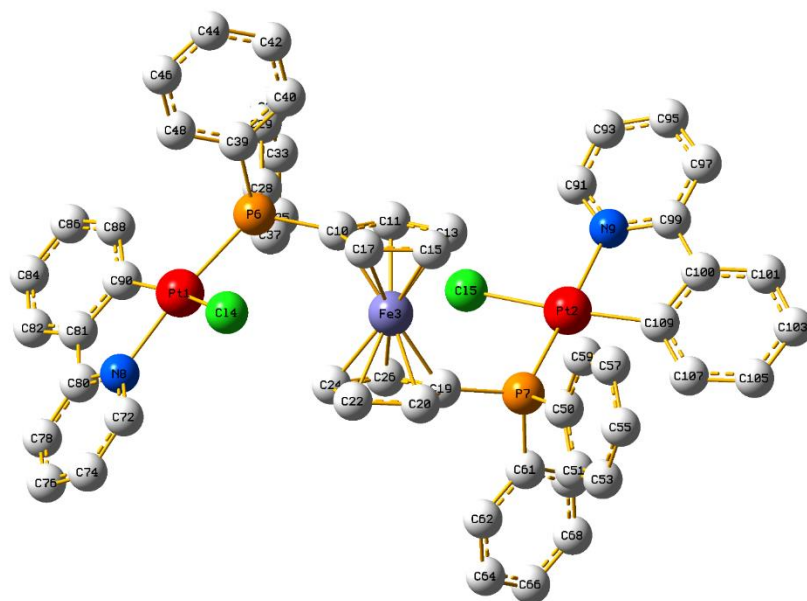

**Figure S24.** View of the optimized structure of **2a** in gas phase (S<sub>0</sub>) with the atom numbering.

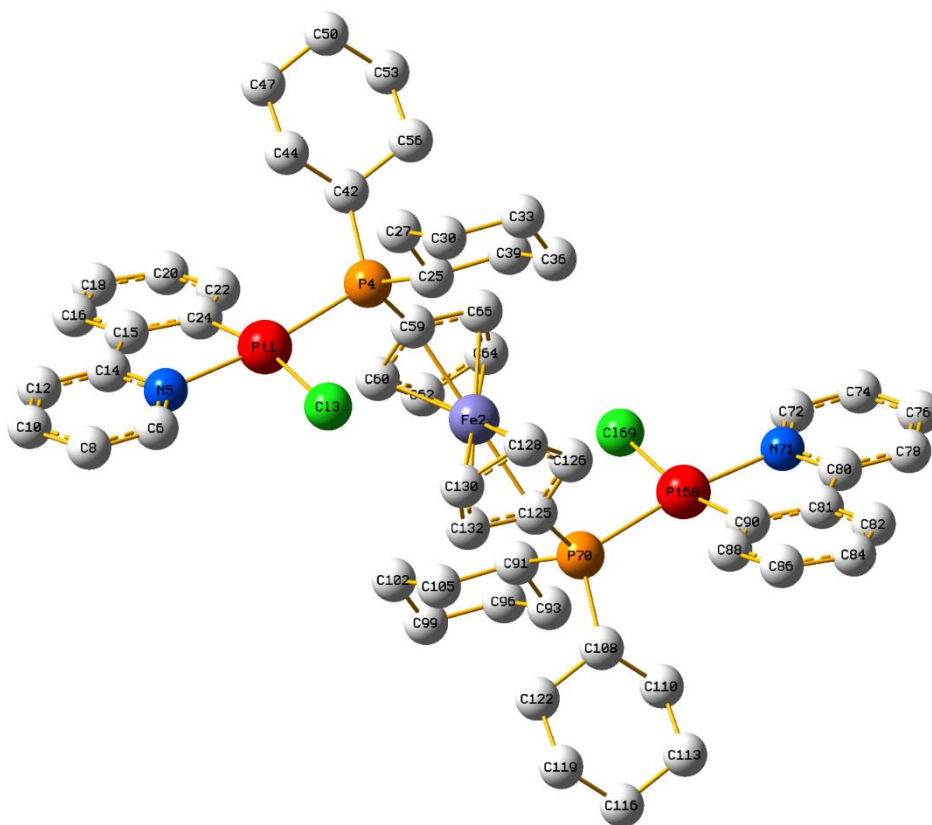

**Figure S25.** View of the optimized structure of **2b** in gas phase (S<sub>0</sub>) with the atom numbering.

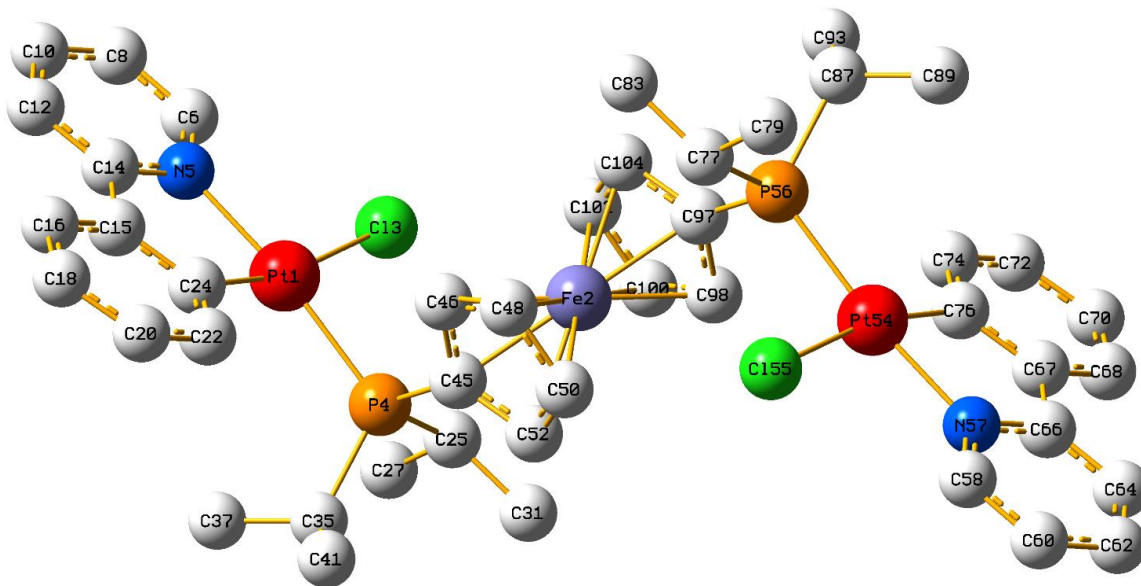

**Figure S26.** View of the optimized structure of **2c** in gas phase ( $S_0$ ) with the atom numbering.

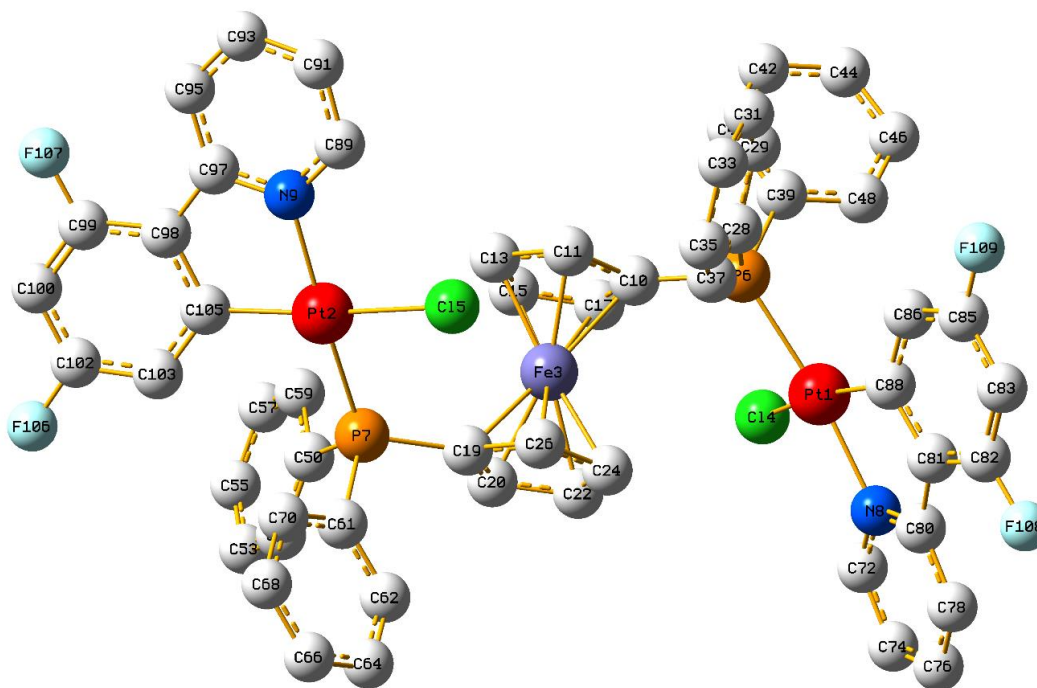

**Figure S27.** View of the optimized structure of **3a** in gas phase ( $S_0$ ) with the atom numbering.

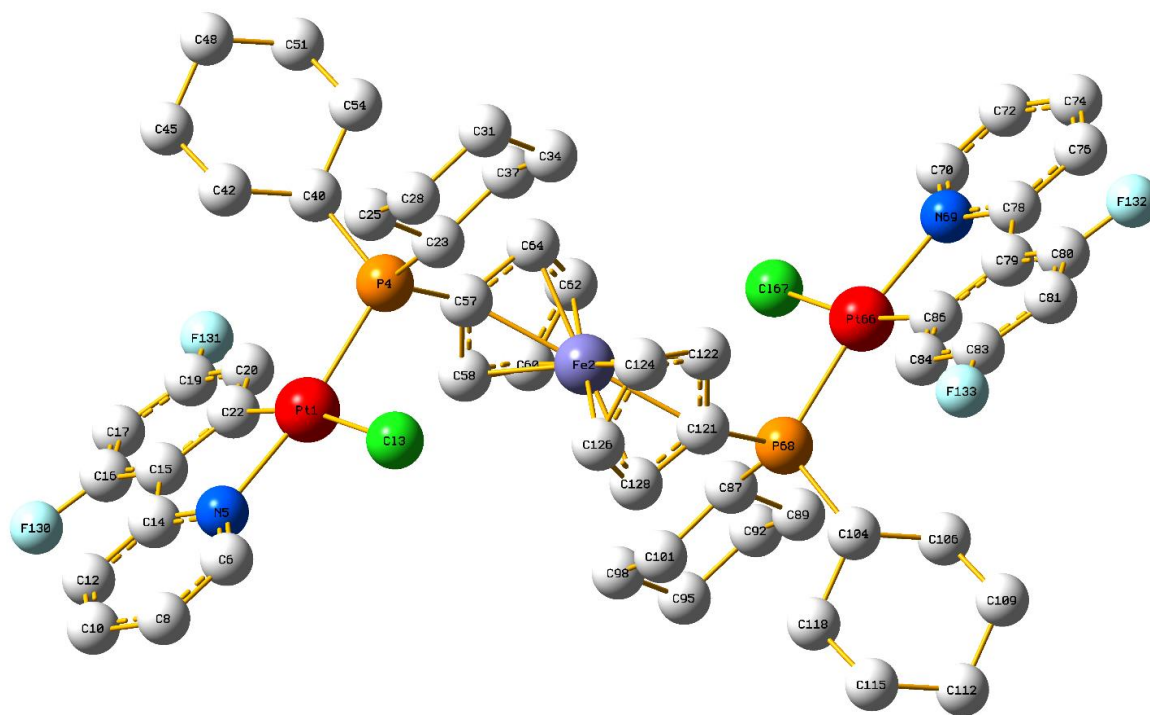

**Figure S28.** View of the optimized structure of **3b** in gas phase ( $S_0$ ) with the atom numbering.

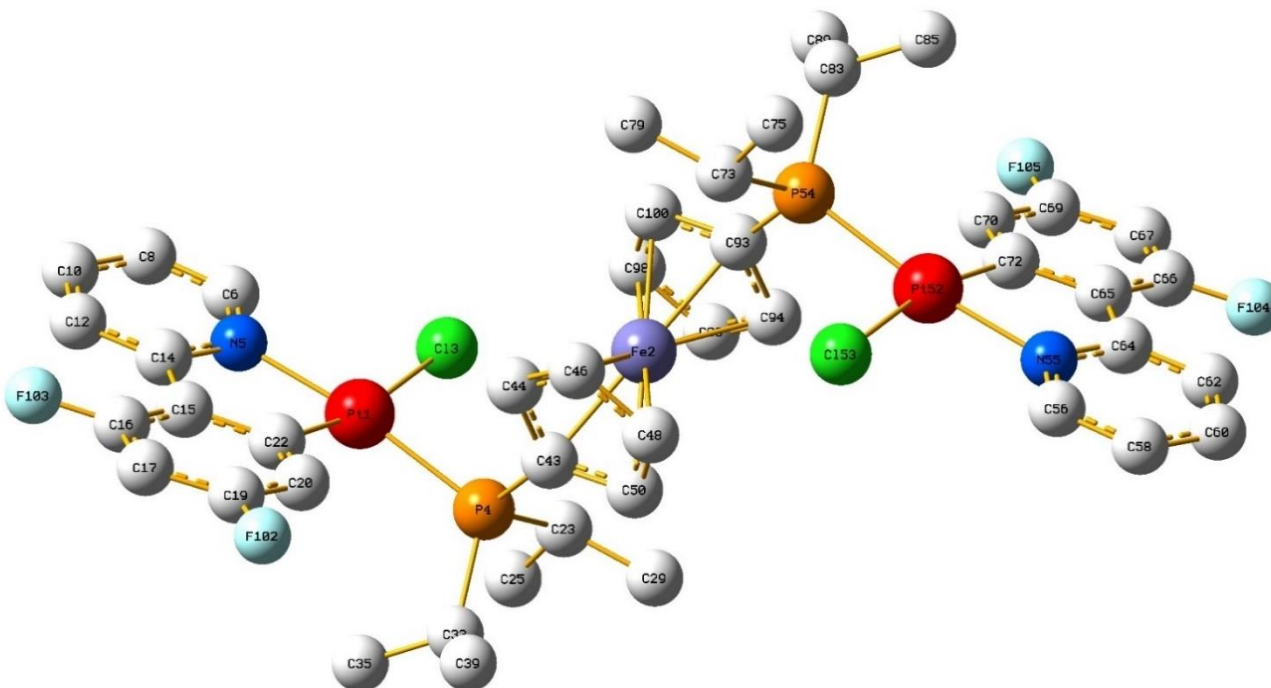

**Figure S29.** View of the optimized structure of **3c** in gas phase ( $S_0$ ) with the atom numbering.

**Table S3.** Selected bond distances (Å°) and angles (deg) for the calculated (S<sub>0</sub> and T<sub>1</sub> in gas phase and S<sub>0</sub> in CH<sub>2</sub>Cl<sub>2</sub>) and crystal structures of **2a**.

| <b>Bond length and angles</b> | <b>X-ray</b> | <b>S<sub>0</sub> (gas phase)</b> | <b>S<sub>0</sub> (CH<sub>2</sub>Cl<sub>2</sub>)</b> | <b>T<sub>1</sub> (gas phase)</b> |
|-------------------------------|--------------|----------------------------------|-----------------------------------------------------|----------------------------------|
| <b>Pt1—C45</b>                | 2.011 (7)    | 2.0293                           | 2.0221                                              | 2.0267                           |
| <b>Pt1—N1</b>                 | 2.087 (5)    | 2.1262                           | 2.1279                                              | 2.1281                           |
| <b>Pt1—P1</b>                 | 2.2286 (18)  | 2.3190                           | 2.3259                                              | 2.3208                           |
| <b>Pt1—Cl1</b>                | 2.3946 (19)  | 2.4818                           | 2.5337                                              | 2.4899                           |
| <b>Pt2—C56</b>                | 2.009 (7)    | 2.0273                           | 2.0237                                              | 2.0302                           |
| <b>Pt2—N2</b>                 | 2.075 (5)    | 2.1258                           | 2.1300                                              | 2.1278                           |
| <b>Pt2—P2</b>                 | 2.2377 (17)  | 2.3212                           | 2.3280                                              | 2.3200                           |
| <b>Pt2—Cl2</b>                | 2.3797 (19)  | 2.4902                           | 2.5325                                              | 2.4806                           |
| <b>C45—Pt1—N1</b>             | 81.0 (2)     | 79.76                            | 79.78                                               | 79.72                            |
| <b>C45—Pt1—P1</b>             | 97.87 (19)   | 98.71                            | 100.11                                              | 99.75                            |
| <b>N1—Pt1—P1</b>              | 168.12 (16)  | 172.80                           | 169.91                                              | 172.49                           |
| <b>C45—Pt1—Cl1</b>            | 159.7 (2)    | 166.48                           | 163.77                                              | 166.37                           |
| <b>N1—Pt1—Cl1</b>             | 90.28 (17)   | 90.77                            | 91.61                                               | 91.05                            |
| <b>P1—Pt1—Cl1</b>             | 94.36 (6)    | 91.85                            | 90.76                                               | 90.71                            |
| <b>C56—Pt2—N2</b>             | 80.4 (3)     | 79.71                            | 79.78                                               | 79.80                            |
| <b>C56—Pt2—P2</b>             | 98.4 (2)     | 100.31                           | 99.15                                               | 98.10                            |
| <b>N2—Pt2—P2</b>              | 172.06 (17)  | 172.22                           | 171.38                                              | 173.86                           |
| <b>C56—Pt2—Cl2</b>            | 161.4 (2)    | 166.28                           | 164.41                                              | 167.87                           |
| <b>N2—Pt2—Cl2</b>             | 90.73 (17)   | 91.19                            | 91.09                                               | 90.66                            |
| <b>P2—Pt2—Cl2</b>             | 92.56 (7)    | 90.18                            | 91.73                                               | 92.13                            |

**Table S4.** Selected bond distances (Å) and angles (deg) for the calculated ( $S_0$  in gas phase and  $S_0$  in  $\text{CH}_2\text{Cl}_2$ ) and crystal structures of **2b** (The molecule was located on an inversion center, thus only  $\frac{1}{2}$  of the atoms were unique).

| Bond length and angles | X-ray      | $S_0$ (gas phase) | $S_0$ ( $\text{CH}_2\text{Cl}_2$ ) |
|------------------------|------------|-------------------|------------------------------------|
| Pt1—C11                | 2.000 (3)  | 2.0280            | 2.0260                             |
| Pt1—N1                 | 2.096 (2)  | 2.1321            | 2.1389                             |
| Pt1—P1                 | 2.2646 (6) | 2.3415            | 2.3518                             |
| Pt1—Cl1                | 2.3999 (7) | 2.4961            | 2.5309                             |
| C11—Pt1—N1             | 80.35 (10) | 79.73             | 79.71                              |
| C11—Pt1—P1             | 98.01 (8)  | 99.00             | 98.52                              |
| N1—Pt1—P1              | 172.70 (7) | 171.64            | 171.27                             |
| C11—Pt1—Cl1            | 167.05 (7) | 167.92            | 167.29                             |
| N1—Pt1—Cl1             | 89.81 (7)  | 90.36             | 90.43                              |
| P1—Pt1—Cl1             | 92.79 (2)  | 91.80             | 92.42                              |

**Table S5.** Selected bond distances (Å) and angles (deg) for the calculated ( $S_0$  in gas phase and  $S_0$  in  $\text{CH}_2\text{Cl}_2$ ) and crystal structures of **2c** (The molecule was located on an inversion center, thus only  $\frac{1}{2}$  of the atoms were unique).

| Bond length and angles | X-ray     | $S_0$ (gas phase) | $S_0$ ( $\text{CH}_2\text{Cl}_2$ ) |
|------------------------|-----------|-------------------|------------------------------------|
| Pt1—C11                | 2.007(3)  | 2.0211            | 2.0186                             |
| Pt1—N1                 | 2.096(2)  | 2.1307            | 2.1389                             |
| Pt1—P1                 | 2.2589(7) | 2.3376            | 2.3503                             |
| Pt1—Cl1                | 2.4051(6) | 2.4974            | 2.5392                             |
| C11—Pt1—N1             | 80.30(10) | 79.76             | 79.73                              |
| C11—Pt1—P1             | 97.33(8)  | 98.94             | 98.48                              |
| N1—Pt1—P1              | 173.19(7) | 172.95            | 173.00                             |
| C11—Pt1—Cl1            | 167.45(8) | 167.73            | 167.06                             |
| N1—Pt1—Cl1             | 90.42(6)  | 90.45             | 90.48                              |
| P1—Pt1—Cl1             | 92.81(2)  | 91.66             | 92.22                              |

**Table S6.** Selected bond distances (Å) and angles (deg) for the calculated (S<sub>0</sub> and T<sub>1</sub> in gas phase and S<sub>0</sub> in CH<sub>2</sub>Cl<sub>2</sub>) and crystal structures of **3a**.

| Bond length and angles | X-ray | S <sub>0</sub> (gas phase) | S <sub>0</sub> (CH <sub>2</sub> Cl <sub>2</sub> ) | T <sub>1</sub> (gas phase) |
|------------------------|-------|----------------------------|---------------------------------------------------|----------------------------|
| Pt1—C88                | -     | 2.0237                     | 2.0190                                            | 2.0229                     |
| Pt1—N8                 | -     | 2.1210                     | 2.1242                                            | 2.1234                     |
| Pt1—P6                 | -     | 2.3283                     | 2.3330                                            | 2.3238                     |
| Pt1—Cl4                | -     | 2.4799                     | 2.5175                                            | 2.4804                     |
| Pt2—C105               | -     | 2.0249                     | 2.0204                                            | 2.0252                     |
| Pt2—N9                 | -     | 2.1213                     | 2.1257                                            | 2.1228                     |
| Pt2—P7                 | -     | 2.3258                     | 2.3348                                            | 2.3266                     |
| Pt2—Cl5                | -     | 2.4731                     | 2.5148                                            | 2.4725                     |
| C88—Pt1—N8             | -     | 79.67                      | 79.70                                             | 79.68                      |
| C88—Pt1—P6             | -     | 101.02                     | 99.76                                             | 100.55                     |
| N8—Pt1—P6              | -     | 172.11                     | 170.69                                            | 172.24                     |
| C88—Pt1—Cl4            | -     | 166.67                     | 164.85                                            | 166.65                     |
| N8—Pt1—Cl4             | -     | 91.67                      | 91.85                                             | 91.65                      |
| P6—Pt1—Cl4             | -     | 88.95                      | 90.60                                             | 89.42                      |
| C105—Pt2—N9            | -     | 79.73                      | 79.66                                             | 79.77                      |
| C105—Pt2—P7            | -     | 99.24                      | 99.65                                             | 98.68                      |
| N9—Pt2—P7              | -     | 172.62                     | 171.26                                            | 173.44                     |
| C105—Pt2—Cl5           | -     | 166.58                     | 164.68                                            | 167.77                     |
| N9—Pt2—Cl5             | -     | 91.37                      | 91.84                                             | 91.27                      |
| P7—Pt2—Cl5             | -     | 90.86                      | 90.66                                             | 91.14                      |

**Table S7.** Selected bond distances (Å) and angles (deg) for the calculated (S<sub>0</sub> in gas phase and S<sub>0</sub> in CH<sub>2</sub>Cl<sub>2</sub>) and crystal structures of **3b** (The molecule was located on an inversion center, thus only ½ of the atoms were unique).

| Bond length and angles | X-ray | S <sub>0</sub> (gas phase) | S <sub>0</sub> (CH <sub>2</sub> Cl <sub>2</sub> ) |
|------------------------|-------|----------------------------|---------------------------------------------------|
| Pt1—C22                | -     | 2.0233                     | 2.0205                                            |
| Pt1—N5                 | -     | 2.1277                     | 2.1333                                            |
| Pt1—P4                 | -     | 2.3489                     | 2.3595                                            |
| Pt1—Cl3                | -     | 2.4849                     | 2.5168                                            |
| C22—Pt1—N5             | -     | 79.66                      | 79.61                                             |
| C22—Pt1—P4             | -     | 99.10                      | 98.65                                             |
| N5—Pt1—P4              | -     | 171.37                     | 171.93                                            |
| C22—Pt1—Cl3            | -     | 168.14                     | 168.48                                            |
| N5—Pt1—Cl3             | -     | 90.84                      | 90.87                                             |
| P4—Pt1—Cl3             | -     | 91.34                      | 91.66                                             |

**Table S8.** Selected bond distances (Å) and angles (deg) for the calculated ( $S_0$  in gas phase and  $S_0$  in  $\text{CH}_2\text{Cl}_2$ ) and crystal structures of **3c** (The molecule was located on an inversion center, thus only  $\frac{1}{2}$  of the atoms were unique).

| <b>Bond length and angles</b> | <b>X-ray</b> | <b><math>S_0</math> (gas phase)</b> | <b><math>S_0</math> (<math>\text{CH}_2\text{Cl}_2</math>)</b> |
|-------------------------------|--------------|-------------------------------------|---------------------------------------------------------------|
| <b>Pt1—C22</b>                | -            | 2.0149                              | 2.0115                                                        |
| <b>Pt1—N5</b>                 | -            | 2.1264                              | 2.1345                                                        |
| <b>Pt1—P4</b>                 | -            | 2.3441                              | 2.3530                                                        |
| <b>Pt1—Cl3</b>                | -            | 2.4857                              | 2.5222                                                        |
| <b>C22—Pt1—N5</b>             | -            | 79.68                               | 79.63                                                         |
| <b>C22—Pt1—P4</b>             | -            | 98.76                               | 98.22                                                         |
| <b>N5—Pt1—P4</b>              | -            | 172.72                              | 171.36                                                        |
| <b>C22—Pt1—Cl3</b>            | -            | 168.25                              | 167.45                                                        |
| <b>N5—Pt1—Cl3</b>             | -            | 91.07                               | 91.35                                                         |
| <b>P4—Pt1—Cl3</b>             | -            | 91.31                               | 91.96                                                         |



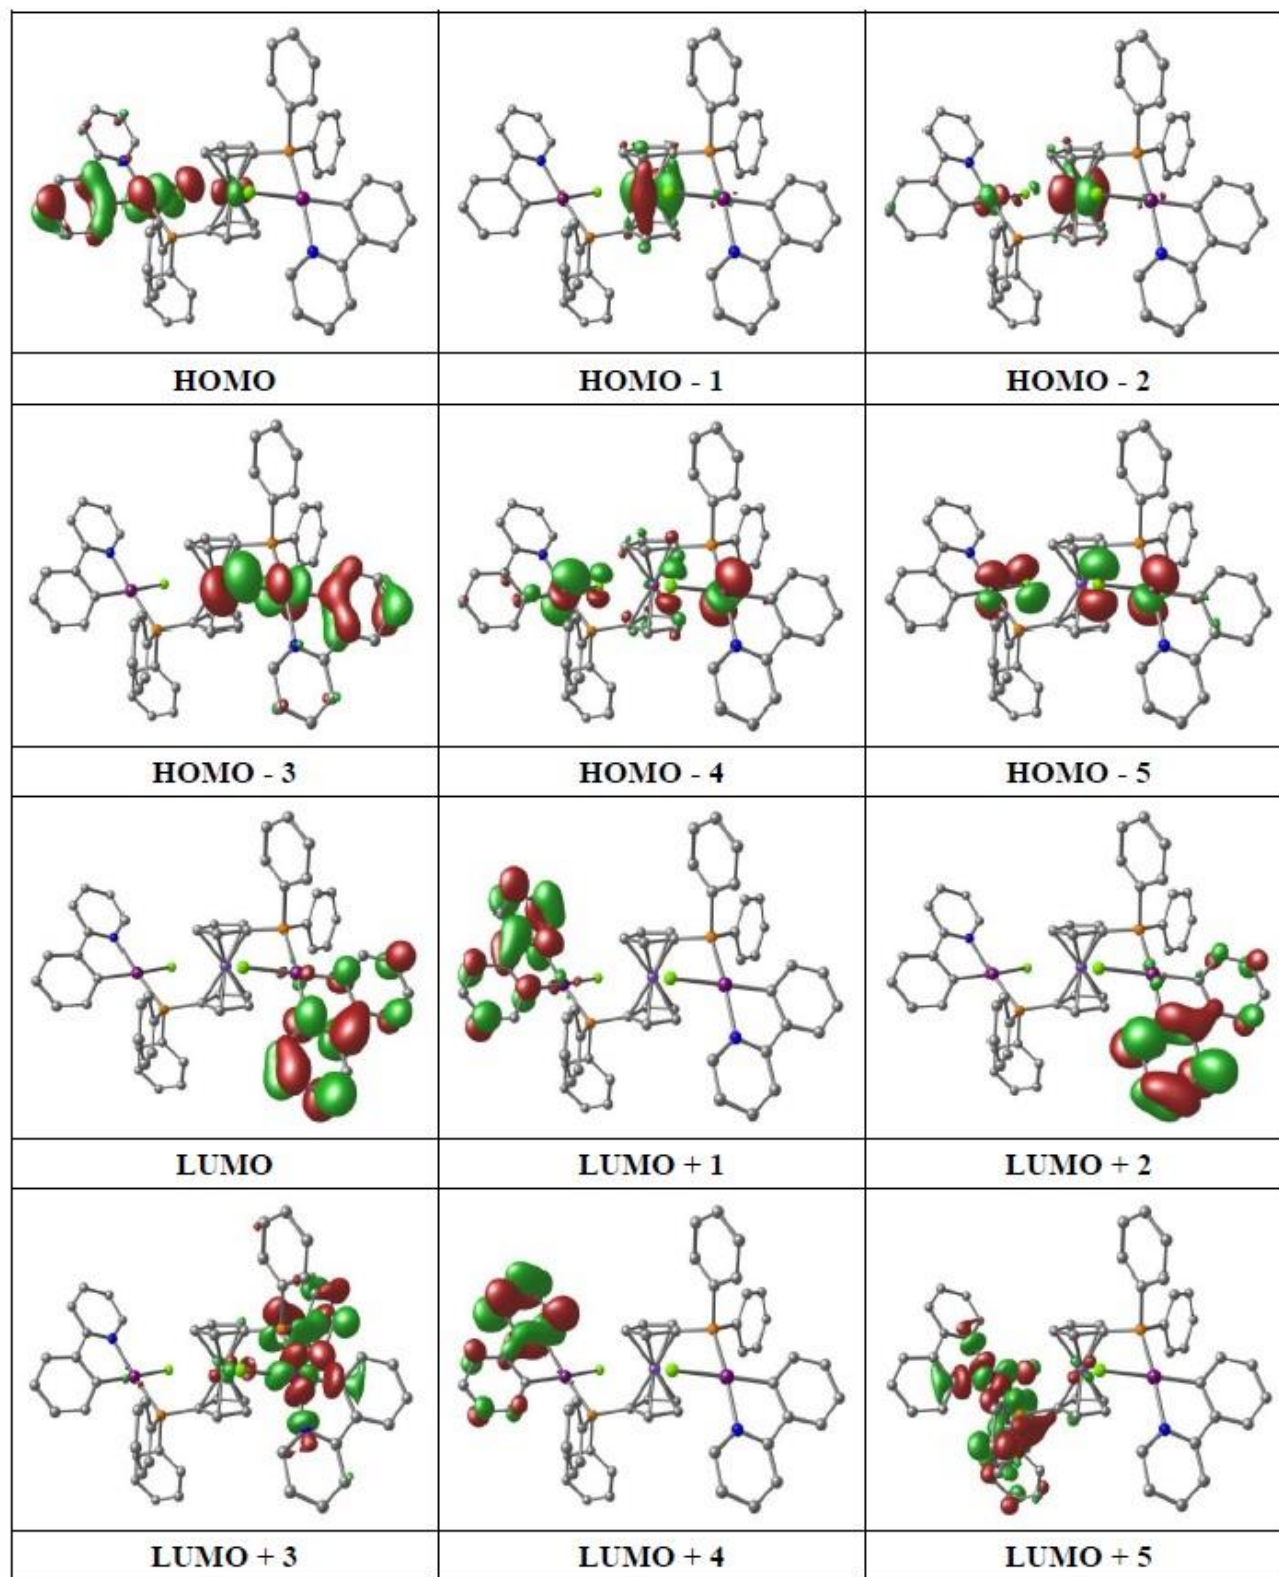

**Figure S30.** Molecular orbital plots for the optimized structure of **2a** in CH<sub>2</sub>Cl<sub>2</sub> solution.

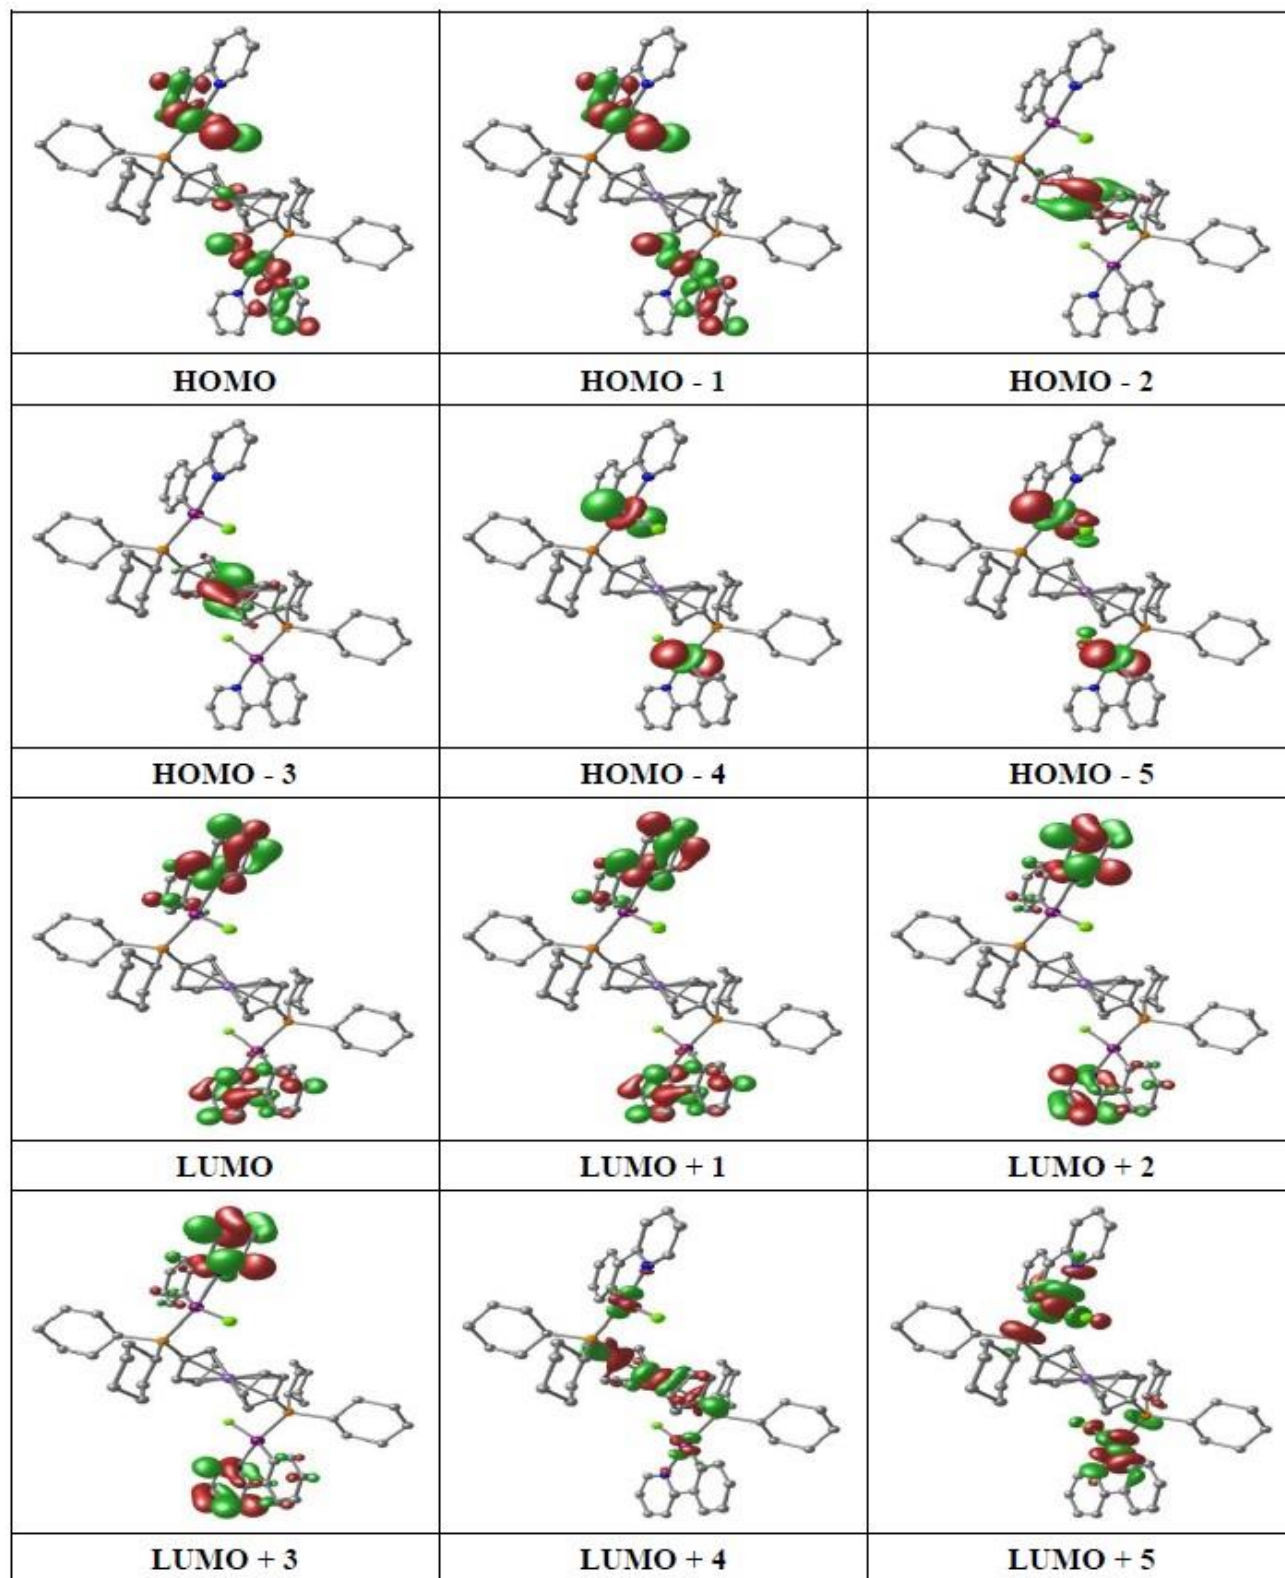

**Figure S31.** Molecular orbital plots for the optimized structure of **2b** in CH<sub>2</sub>Cl<sub>2</sub> solution.

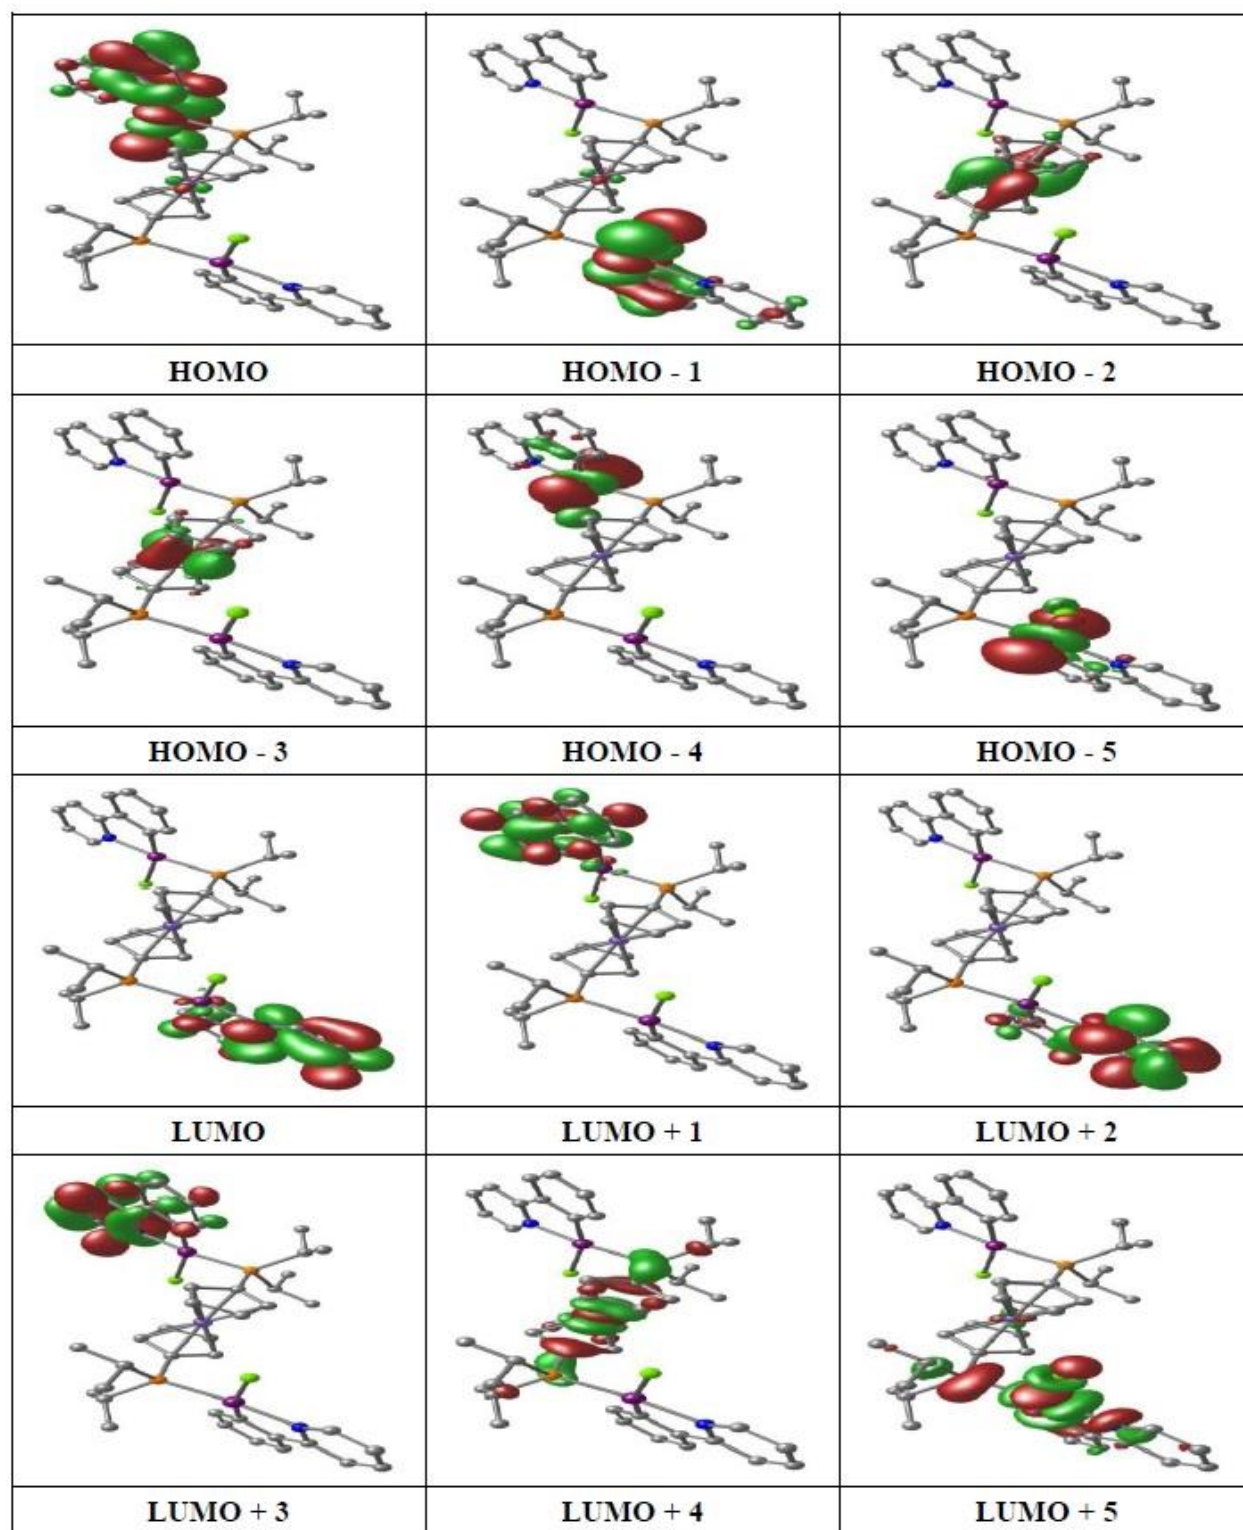

**Figure S32.** Molecular orbital plots for the optimized structure of **2c** in CH<sub>2</sub>Cl<sub>2</sub> solution.

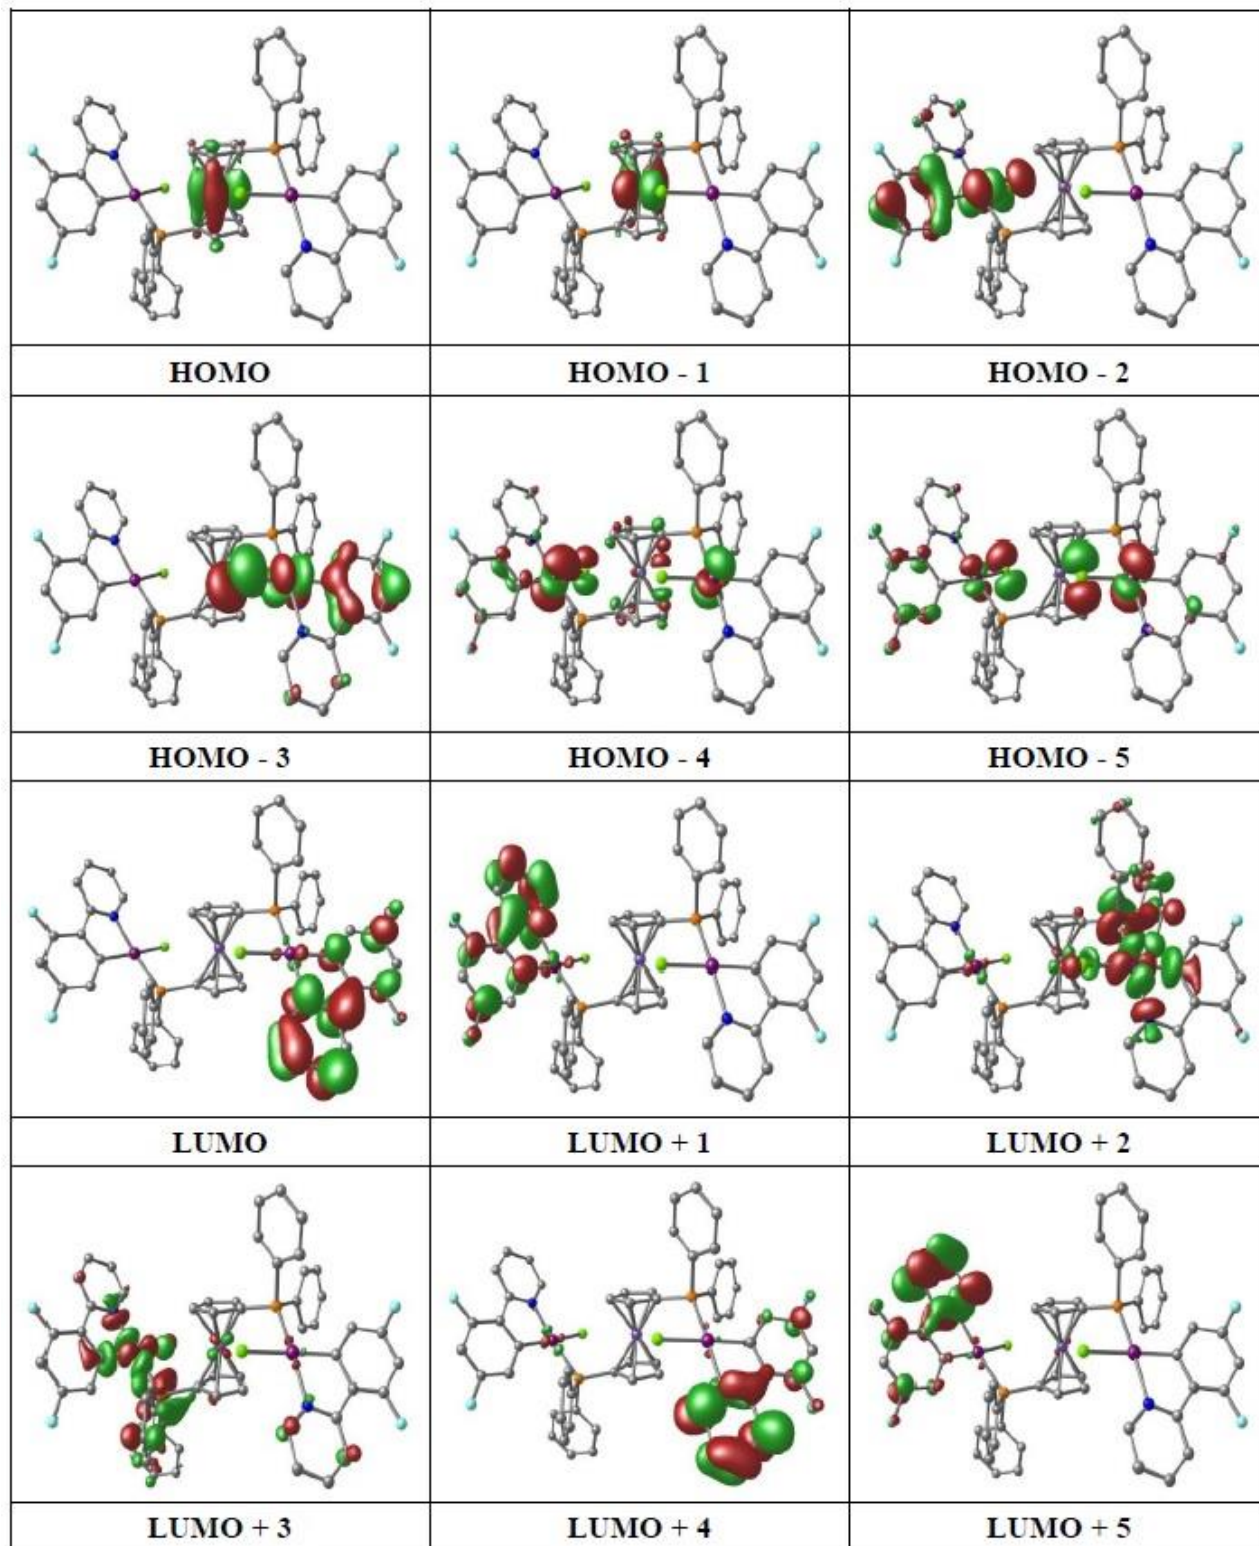

**Figure S33.** Molecular orbital plots for the optimized structure of **3a** in  $\text{CH}_2\text{Cl}_2$  solution.

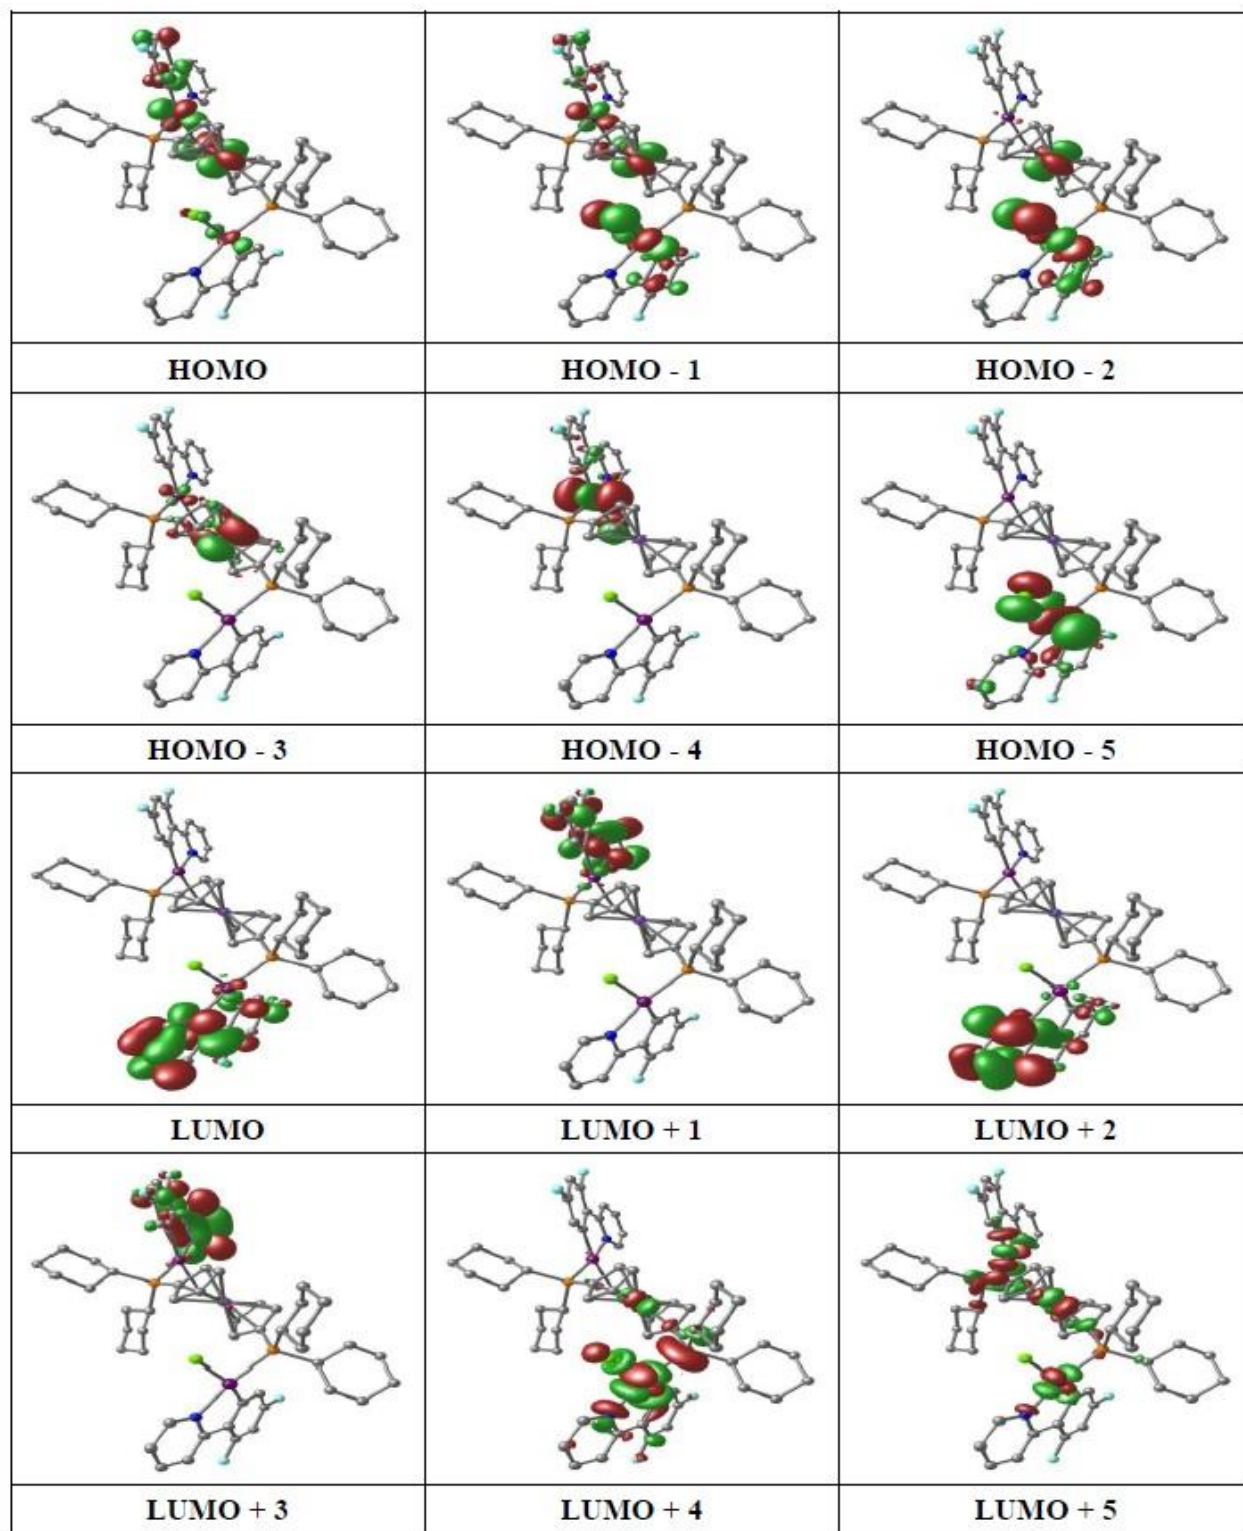

**Figure S34.** Molecular orbital plots for the optimized structure of **3b** in CH<sub>2</sub>Cl<sub>2</sub> solution.

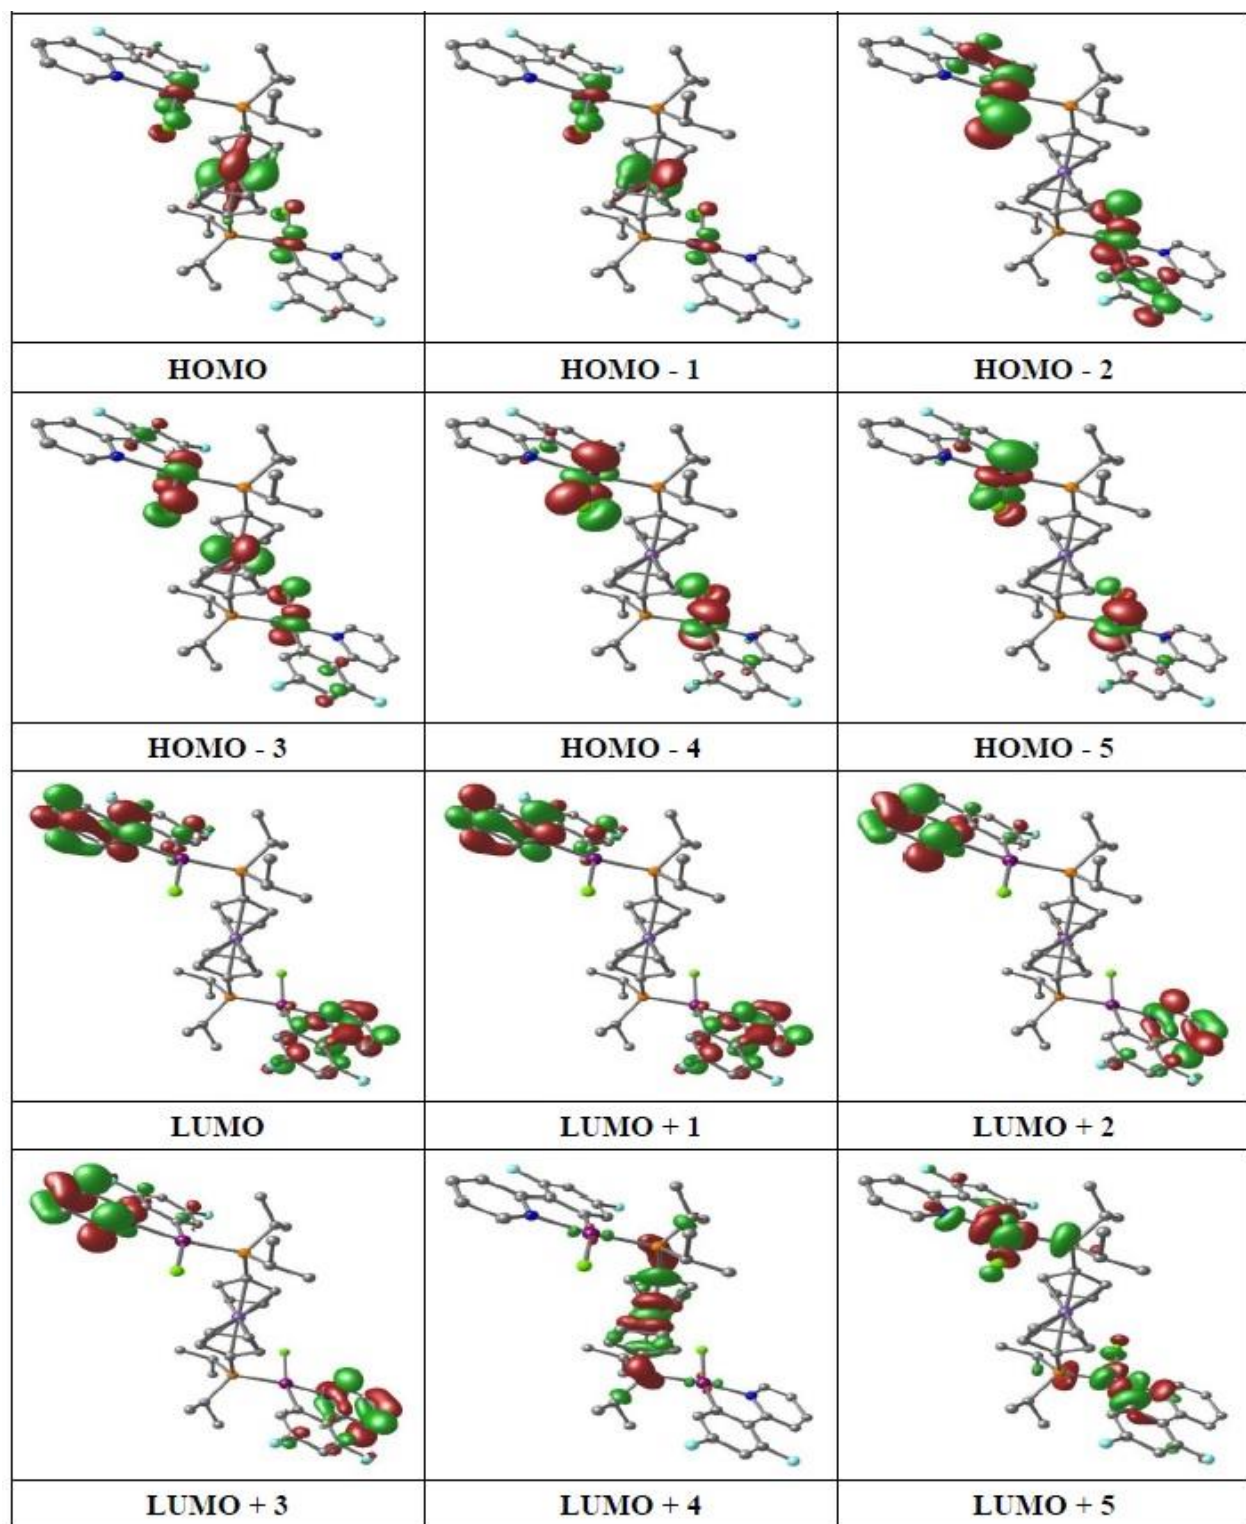

**Figure S35.** Molecular orbital plots for the optimized structure of **3c** in CH<sub>2</sub>Cl<sub>2</sub> solution.

**Table S9.** The energies of the selected molecular orbitals of **2a** with their compositions in CH<sub>2</sub>Cl<sub>2</sub> where M<sub>1</sub> = Pt<sub>1</sub>, M<sub>2</sub> = Pt<sub>2</sub>, L<sub>1</sub> = ppy<sub>1</sub>, L<sub>2</sub> = ppy<sub>2</sub>, L<sub>3</sub> = Cl<sub>1</sub>, L<sub>4</sub> = Cl<sub>2</sub> and L<sub>f</sub> = dppf.

| MO     | # of MO | Energy (ev) | Complex 2a (solution phase singlet) |                          |                           |                           |                                   |                                   |                        |
|--------|---------|-------------|-------------------------------------|--------------------------|---------------------------|---------------------------|-----------------------------------|-----------------------------------|------------------------|
|        |         |             | Components (%)                      |                          |                           |                           |                                   |                                   |                        |
|        |         |             | Pt (1) (M <sub>1</sub> )            | Pt (2) (M <sub>2</sub> ) | ppy (1) (L <sub>1</sub> ) | ppy (2) (L <sub>2</sub> ) | Cl <sub>1</sub> (L <sub>3</sub> ) | Cl <sub>2</sub> (L <sub>4</sub> ) | dppf (L <sub>f</sub> ) |
| LUMO+5 | 261     | -0.785      | 30                                  | 1                        | 18                        | 1                         | 3                                 | 0                                 | 47                     |
| LUMO+4 | 260     | -0.870      | 1                                   | 0                        | 94                        | 0                         | 0                                 | 0                                 | 5                      |
| LUMO+3 | 259     | -0.901      | 1                                   | 29                       | 1                         | 17                        | 0                                 | 2                                 | 50                     |
| LUMO+2 | 258     | -0.940      | 0                                   | 2                        | 0                         | 92                        | 0                                 | 0                                 | 6                      |
| LUMO+1 | 257     | -1.539      | 5                                   | 0                        | 89                        | 0                         | 1                                 | 0                                 | 5                      |
| LUMO   | 256     | -1.607      | 0                                   | 5                        | 0                         | 89                        | 0                                 | 1                                 | 5                      |
| HOMO   | 255     | -5.369      | 37                                  | 0                        | 24                        | 0                         | 21                                | 0                                 | 18                     |
| HOMO-1 | 254     | -5.386      | 1                                   | 1                        | 1                         | 1                         | 1                                 | 1                                 | 94                     |
| HOMO-2 | 253     | -5.398      | 6                                   | 1                        | 4                         | 1                         | 3                                 | 0                                 | 85                     |
| HOMO-3 | 252     | -5.420      | 0                                   | 41                       | 0                         | 26                        | 0                                 | 26                                | 7                      |
| HOMO-4 | 251     | -5.903      | 39                                  | 24                       | 7                         | 4                         | 6                                 | 5                                 | 15                     |
| HOMO-5 | 250     | -5.971      | 21                                  | 24                       | 5                         | 6                         | 23                                | 14                                | 7                      |

**Table S10.** The energies of the selected molecular orbitals of **2b** with their compositions in CH<sub>2</sub>Cl<sub>2</sub> where M<sub>1</sub> = Pt<sub>1</sub>, M<sub>2</sub> = Pt<sub>2</sub>, L<sub>1</sub> = ppy<sub>1</sub>, L<sub>2</sub> = ppy<sub>2</sub>, L<sub>3</sub> = Cl<sub>1</sub>, L<sub>4</sub> = Cl<sub>2</sub> and L<sub>f</sub> = dcpf.

| MO     | # of MO | Energy (ev) | Complex 2b (solution phase singlet) |                          |                           |                           |                                   |                                   |                        |
|--------|---------|-------------|-------------------------------------|--------------------------|---------------------------|---------------------------|-----------------------------------|-----------------------------------|------------------------|
|        |         |             | Components (%)                      |                          |                           |                           |                                   |                                   |                        |
|        |         |             | Pt (1) (M <sub>1</sub> )            | Pt (2) (M <sub>2</sub> ) | ppy (1) (L <sub>1</sub> ) | ppy (2) (L <sub>2</sub> ) | Cl <sub>1</sub> (L <sub>3</sub> ) | Cl <sub>2</sub> (L <sub>4</sub> ) | dcpf (L <sub>f</sub> ) |
| LUMO+5 | 273     | -0.516      | 18                                  | 18                       | 13                        | 13                        | 3                                 | 3                                 | 32                     |
| LUMO+4 | 272     | -0.586      | 4                                   | 4                        | 3                         | 3                         | 1                                 | 1                                 | 84                     |
| LUMO+3 | 271     | -0.910      | 1                                   | 1                        | 48                        | 48                        | 0                                 | 0                                 | 2                      |
| LUMO+2 | 270     | -0.913      | 1                                   | 1                        | 48                        | 48                        | 0                                 | 0                                 | 2                      |
| LUMO+1 | 269     | -1.578      | 3                                   | 2                        | 47                        | 44                        | 0                                 | 0                                 | 4                      |
| LUMO   | 268     | -1.578      | 2                                   | 3                        | 44                        | 47                        | 0                                 | 0                                 | 4                      |
| HOMO   | 267     | -5.453      | 22                                  | 22                       | 13                        | 13                        | 11                                | 11                                | 8                      |
| HOMO-1 | 266     | -5.459      | 24                                  | 24                       | 14                        | 14                        | 11                                | 11                                | 2                      |
| HOMO-2 | 265     | -5.521      | 1                                   | 1                        | 1                         | 1                         | 1                                 | 1                                 | 94                     |
| HOMO-3 | 264     | -5.540      | 1                                   | 1                        | 0                         | 0                         | 0                                 | 0                                 | 98                     |
| HOMO-4 | 263     | -5.986      | 42                                  | 42                       | 4                         | 4                         | 1                                 | 1                                 | 6                      |
| HOMO-5 | 262     | -5.991      | 40                                  | 40                       | 4                         | 4                         | 3                                 | 3                                 | 6                      |

**Table S11.** The energies of the selected molecular orbitals of **2c** with their compositions in CH<sub>2</sub>Cl<sub>2</sub> where M<sub>1</sub> = Pt<sub>1</sub>, M<sub>2</sub> = Pt<sub>2</sub>, L<sub>1</sub> = ppy<sub>1</sub>, L<sub>2</sub> = ppy<sub>2</sub>, L<sub>3</sub> = Cl<sub>1</sub>, L<sub>4</sub> = Cl<sub>2</sub> and L<sub>f</sub> =dippf.

| Complex 2c (solution phase singlet) |         |             |                             |                             |                              |                              |                                      |                                      |                            |
|-------------------------------------|---------|-------------|-----------------------------|-----------------------------|------------------------------|------------------------------|--------------------------------------|--------------------------------------|----------------------------|
| MO                                  | # of MO | Energy (ev) | Components (%)              |                             |                              |                              |                                      |                                      |                            |
|                                     |         |             | Pt (1)<br>(M <sub>1</sub> ) | Pt (2)<br>(M <sub>2</sub> ) | ppy (1)<br>(L <sub>1</sub> ) | ppy (2)<br>(L <sub>2</sub> ) | Cl <sub>1</sub><br>(L <sub>3</sub> ) | Cl <sub>2</sub><br>(L <sub>4</sub> ) | dippf<br>(L <sub>f</sub> ) |
| LUMO+5                              | 229     | -0.523      | 35                          | 0                           | 1                            | 26                           | 0                                    | 6                                    | 32                         |
| LUMO+4                              | 228     | -0.680      | 1                           | 1                           | 1                            | 2                            | 0                                    | 0                                    | 95                         |
| LUMO+3                              | 227     | -0.929      | 0                           | 1                           | 2                            | 95                           | 0                                    | 0                                    | 2                          |
| LUMO+2                              | 226     | -0.940      | 1                           | 0                           | 95                           | 2                            | 0                                    | 0                                    | 2                          |
| LUMO+1                              | 225     | -1.602      | 0                           | 5                           | 0                            | 90                           | 0                                    | 1                                    | 4                          |
| LUMO                                | 224     | -1.614      | 5                           | 0                           | 90                           | 0                            | 1                                    | 0                                    | 4                          |
| HOMO                                | 223     | -5.464      | 1                           | 45                          | 0                            | 28                           | 0                                    | 23                                   | 3                          |
| HOMO-1                              | 222     | -5.485      | 45                          | 1                           | 28                           | 0                            | 22                                   | 0                                    | 4                          |
| HOMO-2                              | 221     | -5.575      | 1                           | 0                           | 1                            | 0                            | 1                                    | 0                                    | 97                         |
| HOMO-3                              | 220     | -5.595      | 1                           | 1                           | 0                            | 0                            | 0                                    | 0                                    | 98                         |
| HOMO-4                              | 219     | -6.016      | 0                           | 75                          | 0                            | 10                           | 1                                    | 9                                    | 5                          |
| HOMO-5                              | 218     | -6.033      | 81                          | 1                           | 9                            | 0                            | 3                                    | 1                                    | 5                          |

**Table S12.** The energies of the selected molecular orbitals of **3a** with their compositions in CH<sub>2</sub>Cl<sub>2</sub> where M<sub>1</sub> = Pt<sub>1</sub>, M<sub>2</sub> = Pt<sub>2</sub>, L<sub>1</sub> = dfppy<sub>1</sub>, L<sub>2</sub> = dfppy<sub>2</sub>, L<sub>3</sub> = Cl<sub>1</sub>, L<sub>4</sub> = Cl<sub>2</sub> and L<sub>f</sub> =dppf.

| Complex 3a (solution phase singlet) |         |             |                             |                             |                                |                                |                                      |                                      |                           |
|-------------------------------------|---------|-------------|-----------------------------|-----------------------------|--------------------------------|--------------------------------|--------------------------------------|--------------------------------------|---------------------------|
| MO                                  | # of MO | Energy (ev) | Components (%)              |                             |                                |                                |                                      |                                      |                           |
|                                     |         |             | Pt (1)<br>(M <sub>1</sub> ) | Pt (2)<br>(M <sub>2</sub> ) | dfppy (1)<br>(L <sub>1</sub> ) | dfppy (2)<br>(L <sub>2</sub> ) | Cl <sub>1</sub><br>(L <sub>3</sub> ) | Cl <sub>2</sub><br>(L <sub>4</sub> ) | dppf<br>(L <sub>f</sub> ) |
| LUMO+5                              | 277     | -0.891      | 4                           | 0                           | 86                             | 0                              | 0                                    | 0                                    | 10                        |
| LUMO+4                              | 276     | -0.950      | 3                           | 4                           | 3                              | 78                             | 0                                    | 0                                    | 12                        |
| LUMO+3                              | 275     | -0.991      | 28                          | 1                           | 20                             | 5                              | 4                                    | 0                                    | 42                        |
| LUMO+2                              | 274     | -1.078      | 2                           | 29                          | 1                              | 20                             | 0                                    | 4                                    | 44                        |
| LUMO+1                              | 273     | -1.661      | 6                           | 0                           | 88                             | 0                              | 1                                    | 0                                    | 5                         |
| LUMO                                | 272     | -1.724      | 0                           | 5                           | 0                              | 89                             | 0                                    | 1                                    | 5                         |
| HOMO                                | 271     | -5.516      | 1                           | 1                           | 0                              | 0                              | 0                                    | 0                                    | 98                        |
| HOMO-1                              | 270     | -5.530      | 1                           | 0                           | 0                              | 0                              | 0                                    | 0                                    | 99                        |
| HOMO-2                              | 269     | -5.647      | 42                          | 0                           | 26                             | 0                              | 29                                   | 0                                    | 3                         |
| HOMO-3                              | 268     | -5.690      | 0                           | 42                          | 0                              | 25                             | 0                                    | 30                                   | 3                         |
| HOMO-4                              | 267     | -6.112      | 43                          | 16                          | 11                             | 2                              | 9                                    | 3                                    | 16                        |
| HOMO-5                              | 266     | -6.175      | 10                          | 23                          | 14                             | 8                              | 23                                   | 15                                   | 7                         |



**Table S13.** The energies of the selected molecular orbitals of **3b** with their compositions in CH<sub>2</sub>Cl<sub>2</sub> where M<sub>1</sub> = Pt<sub>1</sub>, M<sub>2</sub> = Pt<sub>2</sub>, L<sub>1</sub> = dfppy<sub>1</sub>, L<sub>2</sub> = dfppy<sub>2</sub>, L<sub>3</sub> = Cl<sub>1</sub>, L<sub>4</sub> = Cl<sub>2</sub> and L<sub>f</sub> = dcpf.

| MO     | # of MO | Energy (ev) | Complex 3b (solution phase singlet) |                             |                                |                                |                                      |                                      |                           |
|--------|---------|-------------|-------------------------------------|-----------------------------|--------------------------------|--------------------------------|--------------------------------------|--------------------------------------|---------------------------|
|        |         |             | Components (%)                      |                             |                                |                                |                                      |                                      |                           |
|        |         |             | Pt (1)<br>(M <sub>1</sub> )         | Pt (2)<br>(M <sub>2</sub> ) | dfppy (1)<br>(L <sub>1</sub> ) | dfppy (2)<br>(L <sub>2</sub> ) | Cl <sub>1</sub><br>(L <sub>3</sub> ) | Cl <sub>2</sub><br>(L <sub>4</sub> ) | dcpf<br>(L <sub>f</sub> ) |
| LUMO+5 | 289     | -0.739      | 16                                  | 8                           | 13                             | 7                              | 4                                    | 1                                    | 51                        |
| LUMO+4 | 288     | -0.760      | 1                                   | 28                          | 1                              | 25                             | 0                                    | 6                                    | 39                        |
| LUMO+3 | 287     | -0.912      | 2                                   | 0                           | 95                             | 0                              | 0                                    | 0                                    | 3                         |
| LUMO+2 | 286     | -0.931      | 0                                   | 2                           | 0                              | 95                             | 0                                    | 0                                    | 3                         |
| LUMO+1 | 285     | -1.681      | 5                                   | 0                           | 90                             | 0                              | 1                                    | 0                                    | 4                         |
| LUMO   | 284     | -1.697      | 0                                   | 6                           | 0                              | 89                             | 0                                    | 1                                    | 4                         |
| HOMO   | 283     | -5.695      | 26                                  | 4                           | 15                             | 2                              | 16                                   | 2                                    | 35                        |
| HOMO-1 | 282     | -5.707      | 13                                  | 18                          | 8                              | 10                             | 8                                    | 10                                   | 33                        |
| HOMO-2 | 281     | -5.726      | 2                                   | 22                          | 1                              | 13                             | 1                                    | 14                                   | 47                        |
| HOMO-3 | 280     | -5.733      | 4                                   | 0                           | 2                              | 0                              | 2                                    | 0                                    | 92                        |
| HOMO-4 | 279     | -6.191      | 72                                  | 0                           | 10                             | 0                              | 11                                   | 1                                    | 6                         |
| HOMO-5 | 278     | -6.200      | 0                                   | 68                          | 0                              | 13                             | 0                                    | 14                                   | 5                         |

**Table S14.** The energies of the selected molecular orbitals of **3c** with their compositions in CH<sub>2</sub>Cl<sub>2</sub> where M<sub>1</sub> = Pt<sub>1</sub>, M<sub>2</sub> = Pt<sub>2</sub>, L<sub>1</sub> = dfppy<sub>1</sub>, L<sub>2</sub> = dfppy<sub>2</sub>, L<sub>3</sub> = Cl<sub>1</sub>, L<sub>4</sub> = Cl<sub>2</sub> and L<sub>f</sub> = dippf.

| MO     | # of MO | Energy (ev) | Complex 3c (solution phase singlet) |                             |                                |                                |                                      |                                      |                            |
|--------|---------|-------------|-------------------------------------|-----------------------------|--------------------------------|--------------------------------|--------------------------------------|--------------------------------------|----------------------------|
|        |         |             | Components (%)                      |                             |                                |                                |                                      |                                      |                            |
|        |         |             | Pt (1)<br>(M <sub>1</sub> )         | Pt (2)<br>(M <sub>2</sub> ) | dfppy (1)<br>(L <sub>1</sub> ) | dfppy (2)<br>(L <sub>2</sub> ) | Cl <sub>1</sub><br>(L <sub>3</sub> ) | Cl <sub>2</sub><br>(L <sub>4</sub> ) | dippf<br>(L <sub>f</sub> ) |
| LUMO+5 | 245     | -0.752      | 17                                  | 17                          | 15                             | 15                             | 3                                    | 3                                    | 30                         |
| LUMO+4 | 244     | -0.839      | 2                                   | 2                           | 3                              | 3                              | 0                                    | 0                                    | 90                         |
| LUMO+3 | 243     | -0.956      | 1                                   | 1                           | 48                             | 48                             | 0                                    | 0                                    | 2                          |
| LUMO+2 | 242     | -0.960      | 1                                   | 1                           | 47                             | 47                             | 0                                    | 0                                    | 4                          |
| LUMO+1 | 241     | -1.731      | 3                                   | 3                           | 46                             | 44                             | 0                                    | 0                                    | 4                          |
| LUMO   | 240     | -1.732      | 3                                   | 3                           | 45                             | 44                             | 0                                    | 0                                    | 5                          |
| HOMO   | 239     | -5.719      | 7                                   | 7                           | 3                              | 3                              | 3                                    | 3                                    | 74                         |
| HOMO-1 | 238     | -5.746      | 5                                   | 5                           | 4                              | 3                              | 3                                    | 3                                    | 77                         |
| HOMO-2 | 237     | -5.746      | 22                                  | 23                          | 13                             | 13                             | 13                                   | 14                                   | 2                          |
| HOMO-3 | 236     | -5.760      | 11                                  | 11                          | 6                              | 6                              | 6                                    | 6                                    | 54                         |
| HOMO-4 | 235     | -6.235      | 27                                  | 27                          | 8                              | 8                              | 12                                   | 12                                   | 6                          |
| HOMO-5 | 234     | -6.248      | 35                                  | 35                          | 8                              | 8                              | 5                                    | 5                                    | 4                          |

**Table S15.** Wavelengths and the nature of transitions for **2a** where M<sub>1</sub> = Pt<sub>1</sub>, M<sub>2</sub> = Pt<sub>2</sub>, L<sub>1</sub> = ppy<sub>1</sub>, L<sub>2</sub> = ppy<sub>2</sub>, L<sub>3</sub> = Cl<sub>1</sub>, L<sub>4</sub> = Cl<sub>2</sub> and L<sub>f</sub> = dppf.

| Excited state                         | Oscillator strength | Calculated $\lambda$ (nm) | Transitions (Major Contribution)                         | Assignment                                                                                                                                                                                                                                |
|---------------------------------------|---------------------|---------------------------|----------------------------------------------------------|-------------------------------------------------------------------------------------------------------------------------------------------------------------------------------------------------------------------------------------------|
| <b>S<sub>0</sub> → S<sub>3</sub></b>  | 0.0                 | 491.9                     | H-10 → L+8 (15%)<br>H-1 → L+9 (12%)                      | L <sub>f</sub> L <sub>f</sub> CT                                                                                                                                                                                                          |
| <b>S<sub>0</sub> → S<sub>5</sub></b>  | 0.0623              | 377.7                     | H-3 → LUMO (47%)<br>H-1 → LUMO (23%)<br>H-2 → LUMO (10%) | L <sub>f</sub> L <sub>2</sub> CT/M <sub>2</sub> L <sub>2</sub> CT/L <sub>2</sub> L <sub>2</sub> CT/L <sub>4</sub> L <sub>2</sub> CT                                                                                                       |
| <b>S<sub>0</sub> → S<sub>11</sub></b> | 0.0069              | 348.4                     | HOMO → LUMO (41%)<br>H-1 → LUMO (19%)                    | M <sub>1</sub> L <sub>2</sub> CT/L <sub>1</sub> L <sub>2</sub> CT/L <sub>3</sub> L <sub>2</sub> CT/L <sub>f</sub> L <sub>2</sub> CT                                                                                                       |
| <b>S<sub>0</sub> → S<sub>18</sub></b> | 0.0166              | 326.8                     | H-4 → L+2 (32%)<br>H-5 → L+2 (14%)<br>H-5 → L+3 (11%)    | M <sub>1</sub> L <sub>2</sub> CT/M <sub>2</sub> L <sub>2</sub> CT/L <sub>3</sub> L <sub>2</sub> CT/L <sub>4</sub> L <sub>2</sub> CT<br>M <sub>1</sub> L <sub>f</sub> CT/L <sub>3</sub> L <sub>f</sub> CT/L <sub>4</sub> L <sub>f</sub> CT |
| <b>S<sub>0</sub> → S<sub>21</sub></b> | 0.0619              | 308.0                     | H-3 → L+4 (29%)<br>H-7 → LUMO (21%)<br>H-1 → L+4 (14%)   | M <sub>2</sub> L <sub>1</sub> CT/L <sub>2</sub> L <sub>1</sub> CT/L <sub>4</sub> L <sub>1</sub> CT<br>M <sub>2</sub> L <sub>2</sub> CT/L <sub>4</sub> L <sub>2</sub> CT<br>L <sub>f</sub> L <sub>1</sub> CT                               |
| <b>S<sub>0</sub> → S<sub>27</sub></b> | 0.0901              | 300.6                     | H-7 → LUMO (32%)<br>H-9 → LUMO (20%)<br>H-3 → L+4 (11%)  | M <sub>2</sub> L <sub>2</sub> CT/L <sub>4</sub> L <sub>2</sub> CT/M <sub>2</sub> L <sub>1</sub> CT/L <sub>2</sub> L <sub>1</sub> CT/L <sub>4</sub> L <sub>1</sub> CT                                                                      |

**Table S16.** Wavelengths and the nature of transitions for **2b** where M<sub>1</sub> = Pt<sub>1</sub>, M<sub>2</sub> = Pt<sub>2</sub>, L<sub>1</sub> = ppy<sub>1</sub>, L<sub>2</sub> = ppy<sub>2</sub>, L<sub>3</sub> = Cl<sub>1</sub>, L<sub>4</sub> = Cl<sub>2</sub> and L<sub>f</sub> = dcpf.

| Excited state                         | Oscillator strength | Calculated $\lambda$ (nm) | Transitions (Major Contribution)                                             | Assignment                                                                                                                                                                                                                                                                                                                                        |
|---------------------------------------|---------------------|---------------------------|------------------------------------------------------------------------------|---------------------------------------------------------------------------------------------------------------------------------------------------------------------------------------------------------------------------------------------------------------------------------------------------------------------------------------------------|
| <b>S<sub>0</sub> → S<sub>3</sub></b>  | 0.0                 | 503.6                     | H-10 → L+4 (20%)<br>H-3 → L+7 (15%)<br>H-2 → L+7 (15%)<br>H-12 → L+4 (12%)   | L <sub>f</sub> L <sub>f</sub> CT/M <sub>1</sub> L <sub>f</sub> CT/M <sub>2</sub> L <sub>f</sub> CT<br>L <sub>1</sub> L <sub>f</sub> CT/L <sub>2</sub> L <sub>f</sub> CT/L <sub>3</sub> L <sub>f</sub> CT/L <sub>4</sub> L <sub>f</sub> CT                                                                                                         |
| <b>S<sub>0</sub> → S<sub>5</sub></b>  | 0.1107              | 376.1                     | H-1 → LUMO (48%)<br>HOMO → L+1 (32%)<br>H-2 → L+1 (11%)                      | M <sub>1</sub> L <sub>1</sub> CT/M <sub>1</sub> L <sub>2</sub> CT/M <sub>2</sub> L <sub>1</sub> CT/M <sub>2</sub> L <sub>2</sub> CT/<br>L <sub>3</sub> L <sub>1</sub> CT/L <sub>3</sub> L <sub>2</sub> CT/L <sub>4</sub> L <sub>1</sub> CT/L <sub>4</sub> L <sub>2</sub> CT<br>L <sub>f</sub> L <sub>1</sub> CT/L <sub>f</sub> L <sub>2</sub> CT  |
| <b>S<sub>0</sub> → S<sub>15</sub></b> | 0.0047              | 333.7                     | H-1 → L+6 (24%)<br>HOMO → L+5 (24%)<br>H-1 → L+4 (15%)                       | M <sub>1</sub> L <sub>f</sub> CT/M <sub>2</sub> L <sub>f</sub> CT/L <sub>3</sub> L <sub>f</sub> CT/L <sub>4</sub> L <sub>f</sub> CT<br>L <sub>1</sub> L <sub>f</sub> CT/L <sub>2</sub> L <sub>f</sub> CT                                                                                                                                          |
| <b>S<sub>0</sub> → S<sub>17</sub></b> | 0.0001              | 324.0                     | H-1 → L+1 (34%)<br>HOMO → LUMO (16%)<br>H-1 → LUMO (15%)<br>H-2 → LUMO (10%) | M <sub>1</sub> L <sub>1</sub> CT/M <sub>1</sub> L <sub>2</sub> CT/M <sub>2</sub> L <sub>1</sub> CT/M <sub>2</sub> L <sub>2</sub> CT/<br>L <sub>3</sub> L <sub>1</sub> CT/L <sub>3</sub> L <sub>2</sub> CT/L <sub>4</sub> L <sub>1</sub> CT/L <sub>4</sub> L <sub>2</sub> CT/<br>L <sub>f</sub> L <sub>1</sub> CT/L <sub>f</sub> L <sub>2</sub> CT |
| <b>S<sub>0</sub> → S<sub>26</sub></b> | 0.2387              | 295.1                     | H-7 → LUMO (25%)<br>H-6 → L+1 (25%)                                          | L <sub>3</sub> L <sub>1</sub> CT/L <sub>3</sub> L <sub>2</sub> CT/L <sub>4</sub> L <sub>1</sub> CT/L <sub>4</sub> L <sub>2</sub> CT/<br>L <sub>f</sub> L <sub>1</sub> CT/L <sub>f</sub> L <sub>2</sub> CT                                                                                                                                         |
| <b>S<sub>0</sub> → S<sub>29</sub></b> | 0.2631              | 286.6                     | H-11 → LUMO (27%)<br>H-10 → L+1 (25%)<br>H-12 → L+1 (11%)                    | M <sub>1</sub> L <sub>1</sub> CT/M <sub>1</sub> L <sub>2</sub> CT/M <sub>2</sub> L <sub>1</sub> CT/M <sub>2</sub> L <sub>2</sub> CT/<br>L <sub>3</sub> L <sub>1</sub> CT/L <sub>3</sub> L <sub>2</sub> CT/L <sub>4</sub> L <sub>1</sub> CT/L <sub>4</sub> L <sub>2</sub> CT/L <sub>f</sub> L <sub>1</sub> CT/<br>L <sub>f</sub> L <sub>2</sub> CT |

**Table S17.** Wavelengths and the nature of transitions for **2c** where M<sub>1</sub> = Pt<sub>1</sub>, M<sub>2</sub> = Pt<sub>2</sub>, L<sub>1</sub> = ppy<sub>1</sub>, L<sub>2</sub> = ppy<sub>2</sub>, L<sub>3</sub> = Cl<sub>1</sub>, L<sub>4</sub> = Cl<sub>2</sub> and L<sub>f</sub> = dippf.

| Excited state            | Oscillator strength | Calculated $\lambda$ (nm) | Transitions (Major Contribution)                                                                                           | Assignment                                                                                                                                                                                                                                                                                                                                                                                                            |
|--------------------------|---------------------|---------------------------|----------------------------------------------------------------------------------------------------------------------------|-----------------------------------------------------------------------------------------------------------------------------------------------------------------------------------------------------------------------------------------------------------------------------------------------------------------------------------------------------------------------------------------------------------------------|
| $S_0 \rightarrow S_3$    | 0.0                 | 506.8                     | H-10 $\rightarrow$ L+4 (30%)<br>H-3 $\rightarrow$ L+7 (28%)<br>H-12 $\rightarrow$ L+4 (12%)<br>H-2 $\rightarrow$ L+4 (10%) | M <sub>2</sub> L <sub>f</sub> CT/L <sub>2</sub> L <sub>f</sub> CT/L <sub>4</sub> L <sub>f</sub> CT<br>L <sub>f</sub> L <sub>f</sub> CT<br>M <sub>1</sub> L <sub>f</sub> CT/M <sub>2</sub> L <sub>f</sub> CT/L <sub>1</sub> L <sub>f</sub> CT/L <sub>2</sub> L <sub>f</sub> CT/L <sub>3</sub><br>L <sub>f</sub> CT/L <sub>4</sub> L <sub>f</sub> CT<br>L <sub>f</sub> L <sub>f</sub> CT                                |
| $S_0 \rightarrow S_5$    | 0.0713              | 377.5                     | HOMO $\rightarrow$ L+1 (66%)<br>H-1 $\rightarrow$ L+1 (23%)                                                                | M <sub>2</sub> L <sub>2</sub> CT/L <sub>4</sub> L <sub>2</sub> CT<br>M <sub>1</sub> L <sub>2</sub> CT/L <sub>1</sub> L <sub>2</sub> CT/L <sub>3</sub> L <sub>2</sub> CT                                                                                                                                                                                                                                               |
| $S_0 \rightarrow S_{15}$ | 0.0027              | 332.2                     | HOMO $\rightarrow$ L+6 (53%)<br>H-1 $\rightarrow$ L+6 (19%)                                                                | M <sub>2</sub> L <sub>f</sub> CT/L <sub>4</sub> L <sub>f</sub> CT/L <sub>2</sub> L <sub>2</sub> CT<br>M <sub>1</sub> M <sub>2</sub> CT/M <sub>1</sub> L <sub>2</sub> CT/M <sub>1</sub> L <sub>f</sub> CT/L <sub>1</sub> M <sub>2</sub> CT/<br>L <sub>1</sub> L <sub>2</sub> CT/L <sub>1</sub> L <sub>f</sub> CT/L <sub>3</sub> M <sub>2</sub> CT/L <sub>3</sub> L <sub>2</sub> CT/L <sub>3</sub><br>L <sub>f</sub> CT |
| $S_0 \rightarrow S_{21}$ | 0.0282              | 307.3                     | HOMO $\rightarrow$ L+3 (45%)<br>H-6 $\rightarrow$ L+1 (15%)<br>H-1 $\rightarrow$ L+3 (14%)                                 | M <sub>2</sub> L <sub>2</sub> CT/L <sub>4</sub> L <sub>2</sub> CT<br>M <sub>2</sub> L <sub>2</sub> CT/L <sub>4</sub> L <sub>2</sub> CT<br>M <sub>1</sub> L <sub>2</sub> CT/L <sub>1</sub> L <sub>2</sub> CT/L <sub>3</sub> L <sub>2</sub> CT                                                                                                                                                                          |
| $S_0 \rightarrow S_{26}$ | 0.2317              | 294.1                     | H-6 $\rightarrow$ L+1 (30%)<br>H-8 $\rightarrow$ L+1 (20%)<br>H-7 $\rightarrow$ LUMO (11%)                                 | M <sub>2</sub> L <sub>2</sub> CT/L <sub>4</sub> L <sub>2</sub> CT<br>L <sub>1</sub> L <sub>2</sub> CT/L <sub>2</sub> L <sub>2</sub> CT/L <sub>4</sub> L <sub>2</sub> CT<br>M <sub>1</sub> L <sub>1</sub> CT/L <sub>3</sub> L <sub>1</sub> CT                                                                                                                                                                          |
| $S_0 \rightarrow S_{29}$ | 0.1304              | 286.0                     | H-11 $\rightarrow$ L+1 (23%)<br>H-10 $\rightarrow$ L+1 (23%)                                                               | M <sub>1</sub> L <sub>2</sub> CT/L <sub>1</sub> L <sub>2</sub> CT/L <sub>3</sub> L <sub>2</sub> CT/L <sub>4</sub> L <sub>2</sub> CT/L <sub>f</sub><br>L <sub>2</sub> CT<br>M <sub>2</sub> L <sub>2</sub> CT/L <sub>4</sub> L <sub>2</sub> CT/L <sub>f</sub> L <sub>2</sub> CT                                                                                                                                         |

**Table S18.** Wavelengths and the nature of transitions for **3a** where M<sub>1</sub> = Pt<sub>1</sub>, M<sub>2</sub> = Pt<sub>2</sub>, L<sub>1</sub> = dfppy<sub>1</sub>, L<sub>2</sub> = dfppy<sub>2</sub>, L<sub>3</sub> = Cl<sub>1</sub>, L<sub>4</sub> = Cl<sub>2</sub> and L<sub>f</sub> = dppf.

| Excited state                    | Oscillator strength | Calculated $\lambda$ (nm) | Transitions (Major Contribution)                        | Assignment                                                                                                                                                                                                                                                                                                                                      |
|----------------------------------|---------------------|---------------------------|---------------------------------------------------------|-------------------------------------------------------------------------------------------------------------------------------------------------------------------------------------------------------------------------------------------------------------------------------------------------------------------------------------------------|
| S <sub>0</sub> → S <sub>3</sub>  | 0.0                 | 491.5                     | H-1 → L+9 (15%)<br>H-1 → L+13 (10%)<br>H-8 → L+8 (10%)  | L <sub>f</sub> L <sub>f</sub> CT/M <sub>1</sub> L <sub>f</sub> CT/M <sub>2</sub> L <sub>f</sub> CT/L <sub>3</sub> L <sub>f</sub> CT/L <sub>4</sub> L <sub>f</sub> CT                                                                                                                                                                            |
| S <sub>0</sub> → S <sub>6</sub>  | 0.0964              | 364.3                     | H-2 → L+1 (51%)<br>H-3 → LUMO (30%)                     | M <sub>1</sub> L <sub>1</sub> CT/L <sub>3</sub> L <sub>1</sub> CT<br>M <sub>2</sub> L <sub>2</sub> CT/L <sub>4</sub> L <sub>2</sub> CT                                                                                                                                                                                                          |
| S <sub>0</sub> → S <sub>10</sub> | 0.0135              | 350.4                     | HOMO → L+1 (56%)<br>H-1 → LUMO (19%)                    | L <sub>f</sub> L <sub>1</sub> CT<br>L <sub>f</sub> L <sub>2</sub> CT                                                                                                                                                                                                                                                                            |
| S <sub>0</sub> → S <sub>17</sub> | 0.0133              | 327.7                     | H-4 → L+2 (26%)<br>H-5 → L+3 (16%)<br>H-4 → LUMO (12%)  | M <sub>1</sub> M <sub>2</sub> CT/M <sub>1</sub> L <sub>2</sub> CT/M <sub>1</sub> L <sub>f</sub> CT<br>M <sub>2</sub> M <sub>1</sub> CT/M <sub>2</sub> L <sub>1</sub> CT/M <sub>2</sub> L <sub>f</sub> CT<br>M <sub>1</sub> L <sub>2</sub> CT/M <sub>2</sub> L <sub>2</sub> CT/L <sub>1</sub> L <sub>2</sub> CT/L <sub>f</sub> L <sub>2</sub> CT |
| S <sub>0</sub> → S <sub>25</sub> | 0.2384              | 307.6                     | H-6 → L+1 (48%)<br>H-7 → LUMO (13%)<br>H-6 → LUMO (12%) | M <sub>1</sub> L <sub>1</sub> CT/L <sub>4</sub> L <sub>1</sub> CT<br>M <sub>1</sub> L <sub>2</sub> CT/L <sub>1</sub> L <sub>2</sub> CT/L <sub>3</sub> L <sub>2</sub> CT/L <sub>4</sub> L <sub>2</sub> CT<br>M <sub>1</sub> L <sub>2</sub> CT/L <sub>1</sub> L <sub>2</sub> CT/L <sub>4</sub> L <sub>2</sub> CT                                  |

**Table S19.** Wavelengths and the nature of transitions for **3b** where M<sub>1</sub> = Pt<sub>1</sub>, M<sub>2</sub> = Pt<sub>2</sub>, L<sub>1</sub> = dfppy<sub>1</sub>, L<sub>2</sub> = dfppy<sub>2</sub>, L<sub>3</sub> = Cl<sub>1</sub>, L<sub>4</sub> = Cl<sub>2</sub> and L<sub>f</sub> = dcpf.

| Excited state                    | Oscillator strength | Calculated $\lambda$ (nm) | Transitions (Major Contribution)                        | Assignment                                                                                                                                                                                                                                                                                                                                                                                                                                                                          |
|----------------------------------|---------------------|---------------------------|---------------------------------------------------------|-------------------------------------------------------------------------------------------------------------------------------------------------------------------------------------------------------------------------------------------------------------------------------------------------------------------------------------------------------------------------------------------------------------------------------------------------------------------------------------|
| S <sub>0</sub> → S <sub>3</sub>  | 0.000               | 496.3                     | H-1 → L+7 (29%)<br>H-10 → L+6 (25%)<br>HOMO → L+6 (12%) | M <sub>1</sub> L <sub>f</sub> CT/M <sub>2</sub> L <sub>f</sub> CT/L <sub>2</sub> L <sub>f</sub> CT/L <sub>4</sub> L <sub>f</sub> CT<br>M <sub>2</sub> M <sub>1</sub> CT/M <sub>2</sub> L <sub>1</sub> CT/M <sub>2</sub> L <sub>f</sub> CT/L <sub>2</sub> M <sub>1</sub> CT/L <sub>2</sub> L <sub>1</sub> CT/L <sub>2</sub> L <sub>f</sub> CT/L <sub>4</sub> M <sub>1</sub> CT/L <sub>4</sub> L <sub>1</sub> CT/L <sub>4</sub> L <sub>f</sub> CT<br>L <sub>1</sub> L <sub>f</sub> CT |
| S <sub>0</sub> → S <sub>6</sub>  | 0.061               | 363.7                     | H-2 → L+1 (82%)                                         | M <sub>2</sub> L <sub>1</sub> CT/L <sub>2</sub> L <sub>1</sub> CT/L <sub>4</sub> L <sub>1</sub> CT/L <sub>f</sub> L <sub>1</sub> CT                                                                                                                                                                                                                                                                                                                                                 |
| S <sub>0</sub> → S <sub>9</sub>  | 0.015               | 340.9                     | H-4 → L+1 (59%)                                         | M <sub>1</sub> L <sub>1</sub> CT/L <sub>3</sub> L <sub>1</sub> CT                                                                                                                                                                                                                                                                                                                                                                                                                   |
| S <sub>0</sub> → S <sub>22</sub> | 0.1624              | 304.3                     | H-6 → LUMO (58%)                                        | M <sub>2</sub> L <sub>2</sub> CT/L <sub>4</sub> L <sub>2</sub> CT                                                                                                                                                                                                                                                                                                                                                                                                                   |
| S <sub>0</sub> → S <sub>35</sub> | 0.1508              | 281.9                     | H-8 → L+4 (24%)                                         | L <sub>2</sub> L <sub>f</sub> CT                                                                                                                                                                                                                                                                                                                                                                                                                                                    |

**Table S20.** Wavelengths and the nature of transitions for **3c** where  $M_1 = Pt_1$ ,  $M_2 = Pt_2$ ,  $L_1 = dfppy_1$ ,  $L_2 = dfppy_2$ ,  $L_3 = Cl_1$ ,  $L_4 = Cl_2$  and  $L_f = dipf$ .

| Excited state            | Oscillator strength | Calculated $\lambda$ (nm) | Transitions (Major Contribution)                                                            | Assignment                                                                                                                                                                                                                                                                                                                                        |
|--------------------------|---------------------|---------------------------|---------------------------------------------------------------------------------------------|---------------------------------------------------------------------------------------------------------------------------------------------------------------------------------------------------------------------------------------------------------------------------------------------------------------------------------------------------|
| $S_0 \rightarrow S_3$    | 0.0                 | 506.3                     | H-10 $\rightarrow$ L+4 (30%)<br>H-1 $\rightarrow$ L+7 (30%)<br>HOMO $\rightarrow$ L+4 (13%) | L <sub>f</sub> L <sub>f</sub> CT<br>L <sub>f</sub> L <sub>f</sub> CT<br>L <sub>f</sub> L <sub>f</sub> CT                                                                                                                                                                                                                                          |
| $S_0 \rightarrow S_6$    | 0.1075              | 364.2                     | H-2 $\rightarrow$ L+1 (48%)<br>H-3 $\rightarrow$ LUMO (45%)                                 | M <sub>1</sub> L <sub>1</sub> CT/M <sub>1</sub> L <sub>2</sub> CT/M <sub>2</sub> L <sub>1</sub> CT/M <sub>2</sub> L <sub>2</sub> CT/<br>L <sub>3</sub> L <sub>1</sub> CT/L <sub>3</sub> L <sub>2</sub> CT/L <sub>4</sub> L <sub>1</sub> CT/L <sub>4</sub> L <sub>2</sub> CT<br>L <sub>f</sub> L <sub>1</sub> CT/L <sub>f</sub> L <sub>2</sub> CT  |
| $S_0 \rightarrow S_{11}$ | 0.014               | 340.5                     | H-1 $\rightarrow$ LUMO (60%)<br>H-4 $\rightarrow$ L+1 (17%)<br>H-5 $\rightarrow$ LUMO (16%) | L <sub>f</sub> L <sub>1</sub> CT/L <sub>f</sub> L <sub>2</sub> CT<br>M <sub>1</sub> L <sub>1</sub> CT/M <sub>1</sub> L <sub>2</sub> CT/M <sub>2</sub> L <sub>1</sub> CT/M <sub>2</sub> L <sub>2</sub> CT/<br>L <sub>3</sub> L <sub>1</sub> CT/L <sub>3</sub> L <sub>2</sub> CT/L <sub>4</sub> L <sub>1</sub> CT/L <sub>4</sub> L <sub>2</sub> CT  |
| $S_0 \rightarrow S_{26}$ | 0.0524              | 289.4                     | H-2 $\rightarrow$ L+2 (28%)<br>H-3 $\rightarrow$ L+3 (27%)                                  | M <sub>1</sub> L <sub>1</sub> CT/M <sub>1</sub> L <sub>2</sub> CT/M <sub>2</sub> L <sub>1</sub> CT/M <sub>2</sub> L <sub>2</sub> CT/<br>L <sub>3</sub> L <sub>1</sub> CT/L <sub>3</sub> L <sub>2</sub> CT/L <sub>4</sub> L <sub>1</sub> CT/L <sub>4</sub> L <sub>2</sub> CT/L <sub>f</sub> L <sub>1</sub> C<br>T/L <sub>f</sub> L <sub>2</sub> CT |
| $S_0 \rightarrow S_{33}$ | 0.2095              | 283.8                     | H-11 $\rightarrow$ L+1 (15%)<br>H-10 $\rightarrow$ LUMO (14%)                               | M <sub>1</sub> L <sub>1</sub> CT/M <sub>1</sub> L <sub>2</sub> CT/M <sub>2</sub> L <sub>1</sub> CT/M <sub>2</sub> L <sub>2</sub> CT/<br>L <sub>3</sub> L <sub>1</sub> CT/L <sub>3</sub> L <sub>2</sub> CT/L <sub>4</sub> L <sub>1</sub> CT/L <sub>4</sub> L <sub>2</sub> CT/L <sub>f</sub> L <sub>1</sub> C<br>T/L <sub>f</sub> L <sub>2</sub> CT |

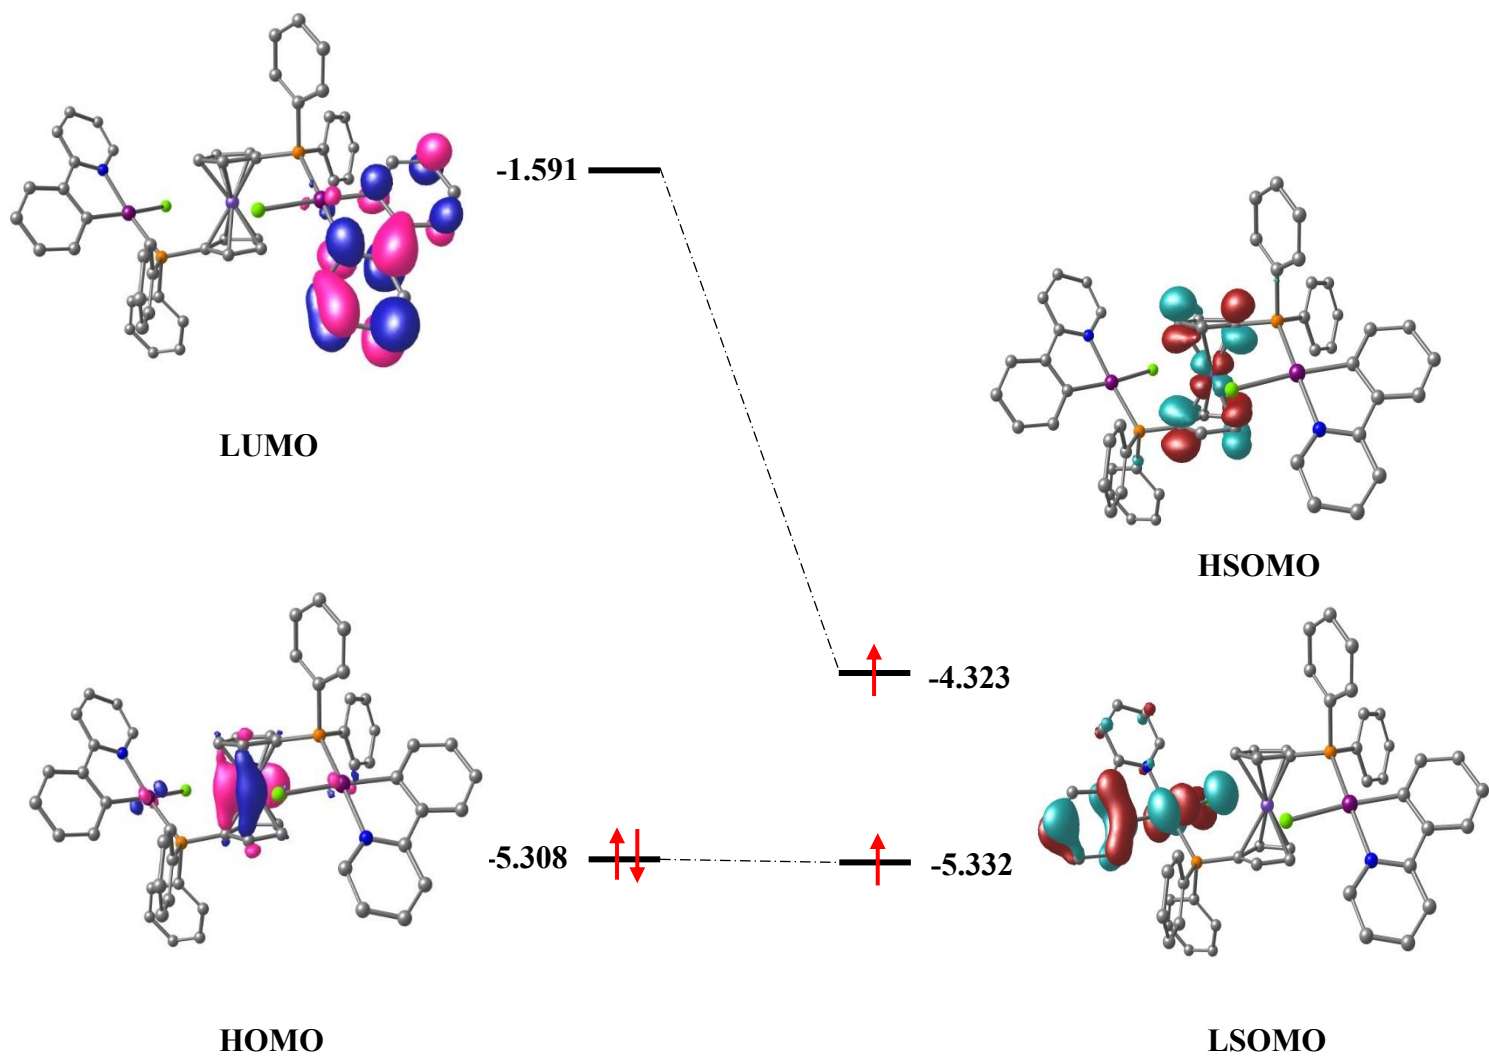

**Figure S36.** Comparative MO diagram for computed  $S_0$  (Left) and  $T_1$  (Right) states of the **2a** in gas phase.

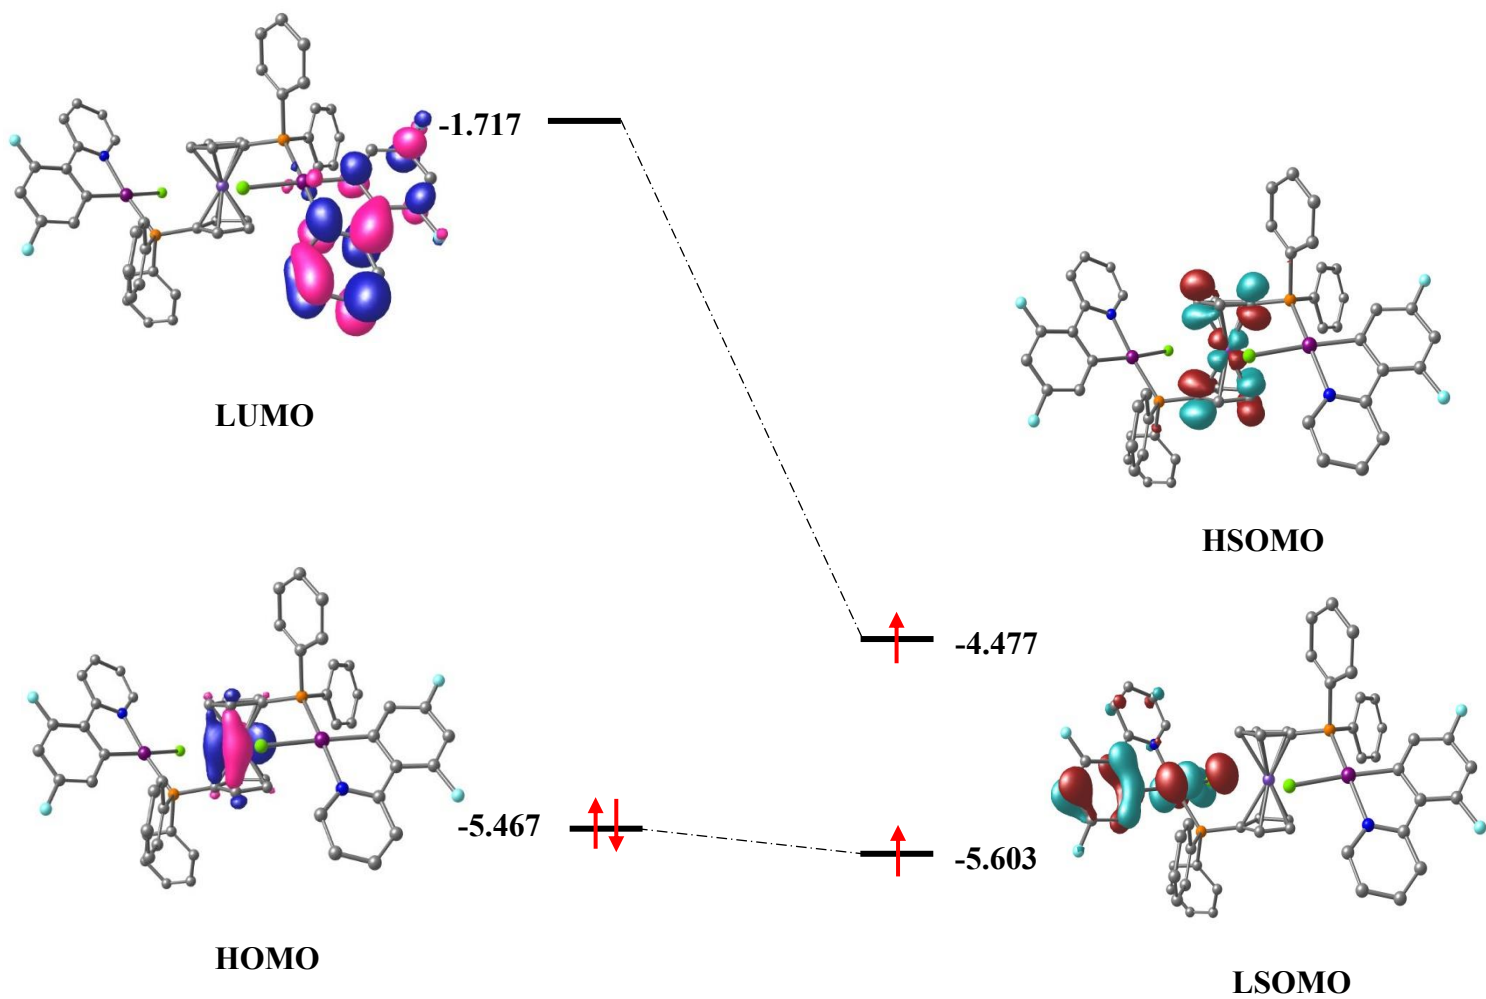

**Figure S37.** Comparative MO diagram for computed  $S_0$  (Left) and  $T_1$  (Right) states of the **3a** in gas phase.



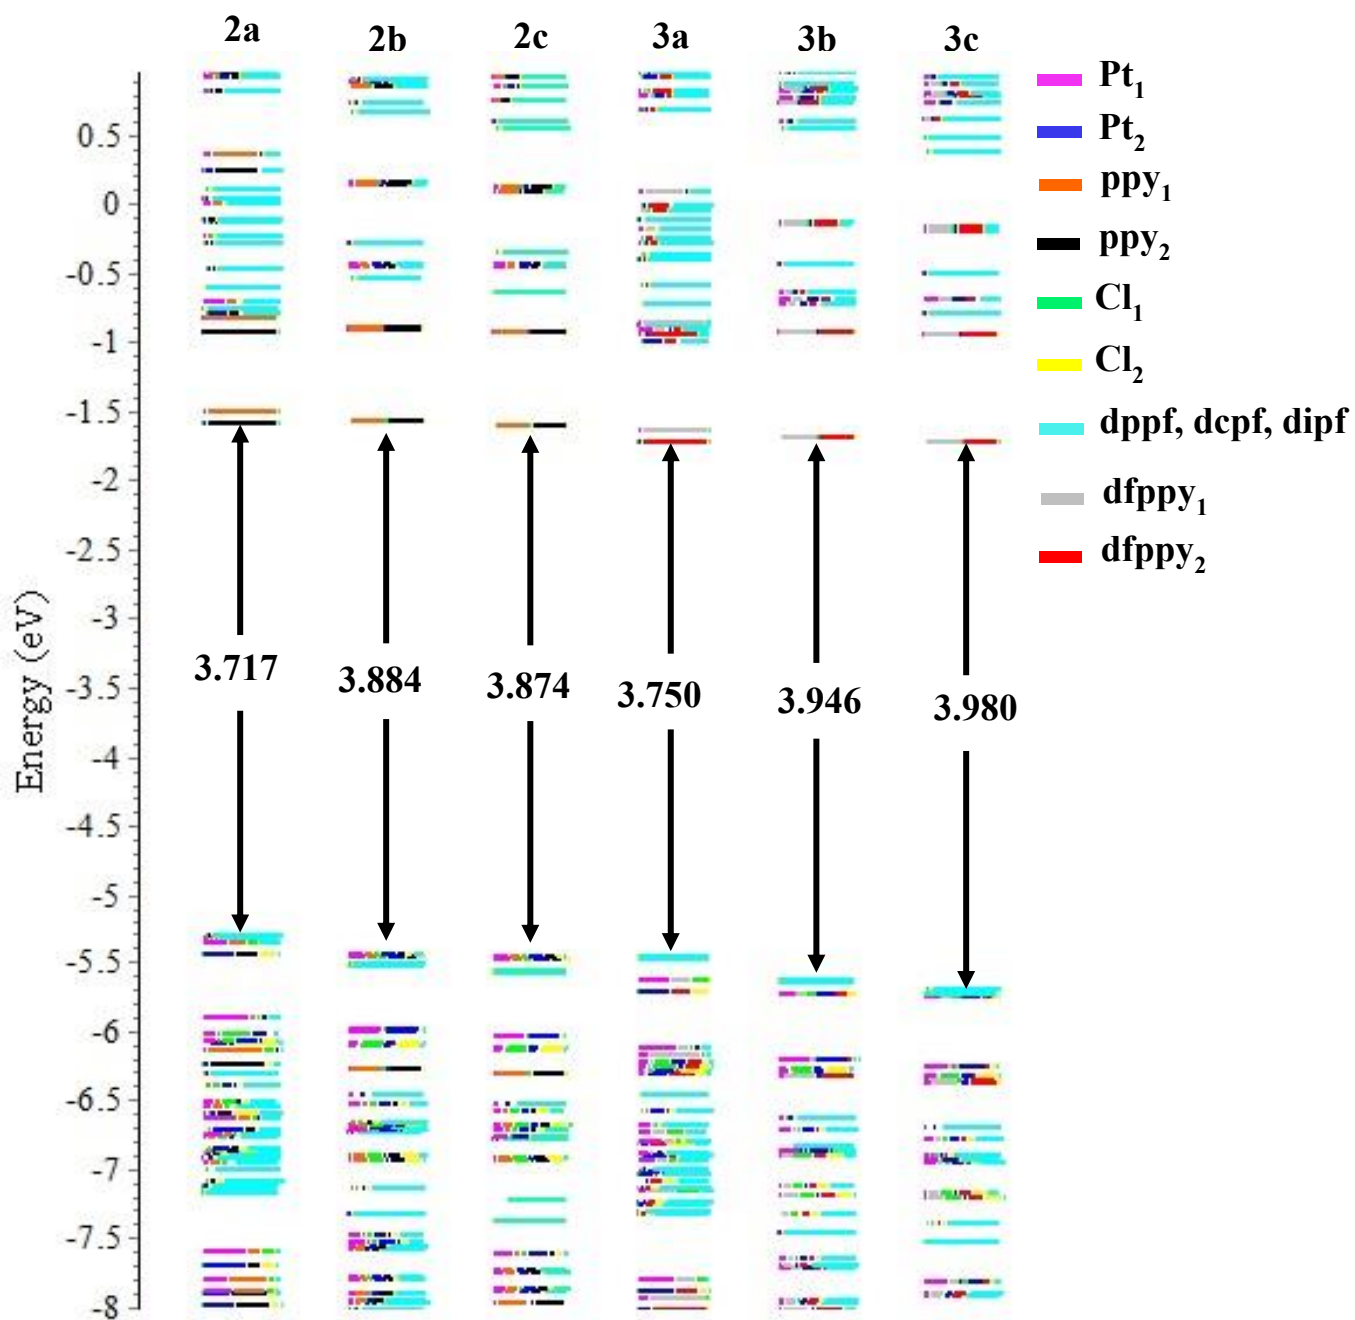

Figure S38. Comparative energy diagram of the complexes 2a–3c in gas phase.

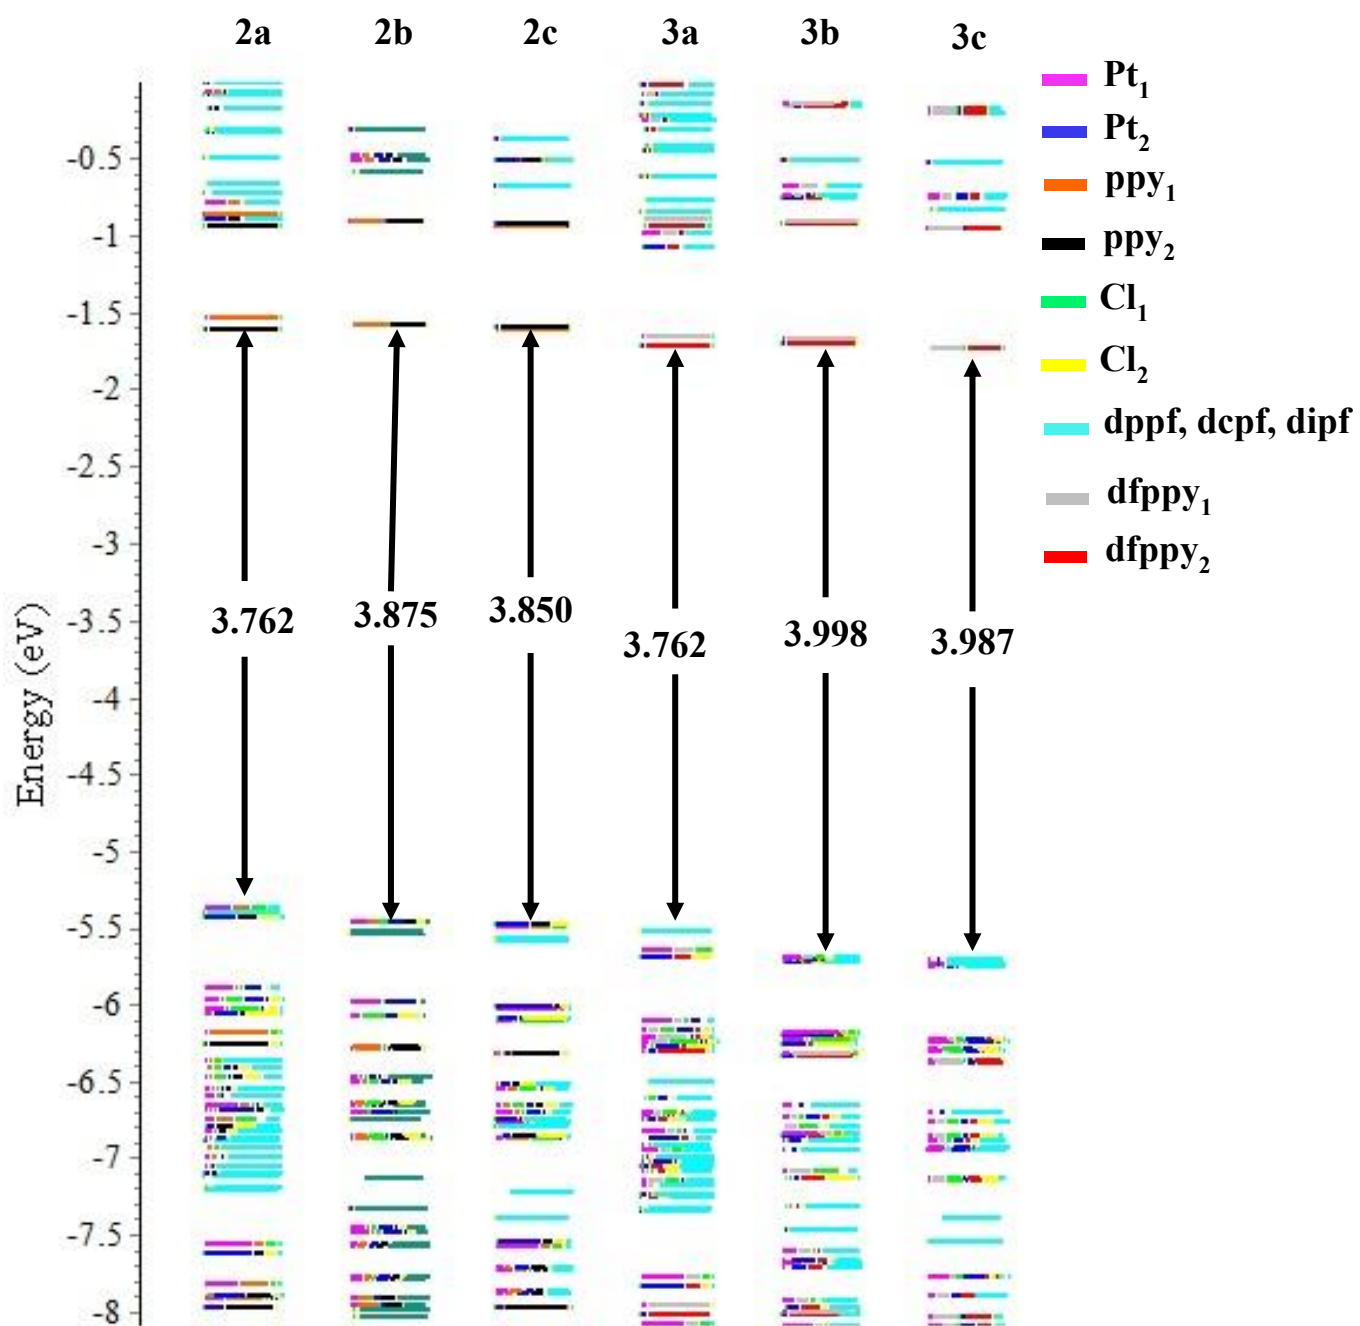

**Figure S39.** Comparative energy diagram of the complexes **2a–3c** in solution phase.

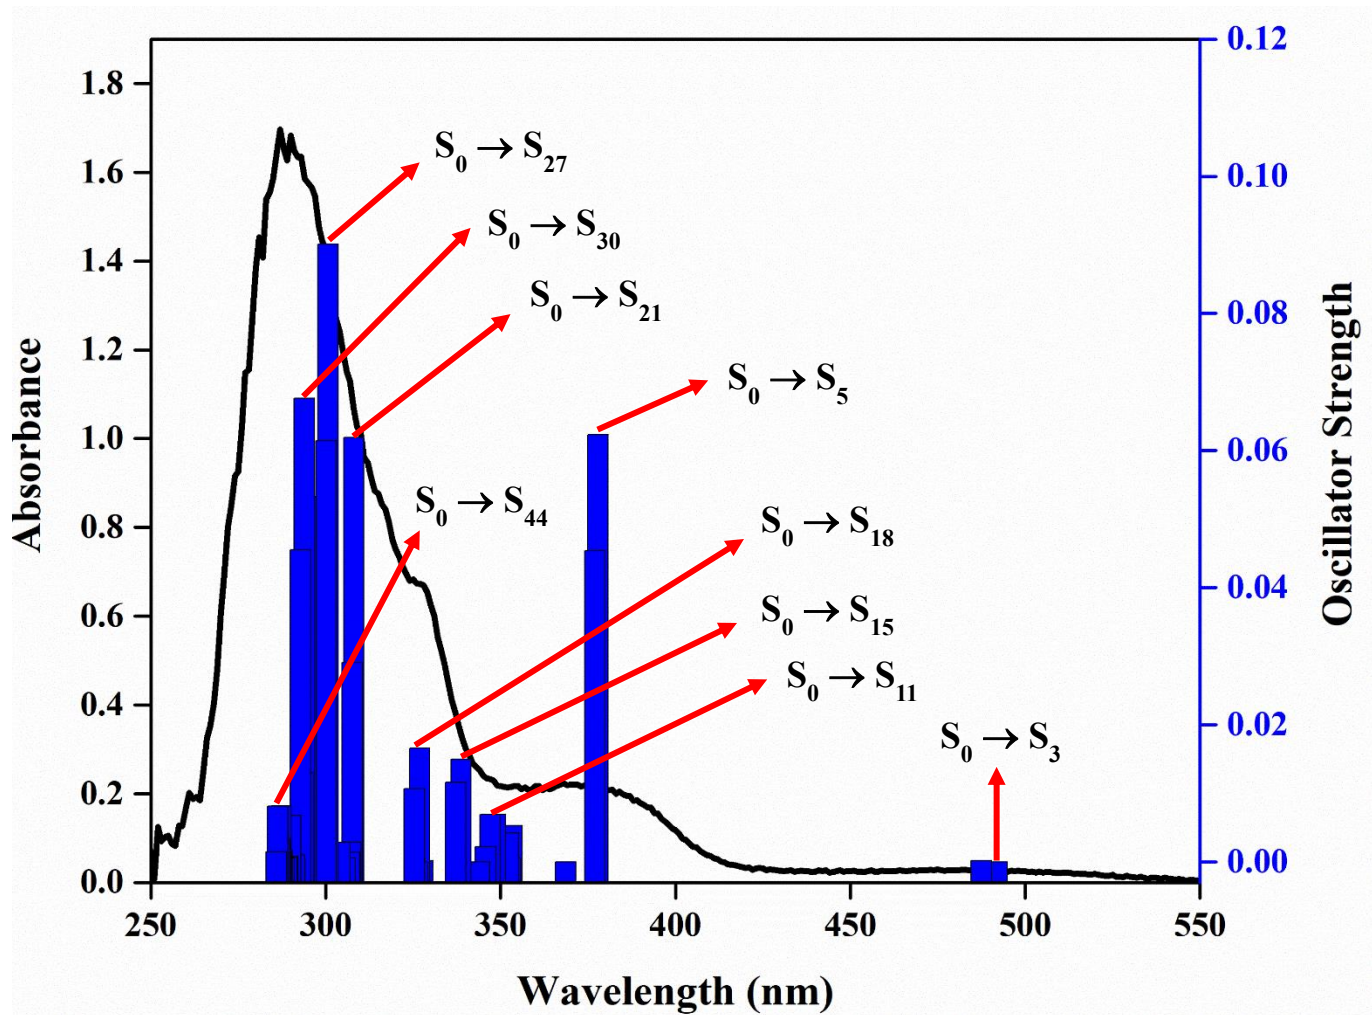

Figure S40. Overlaid experimental (spectra) and theoretical (bars) absorbance for 2a.

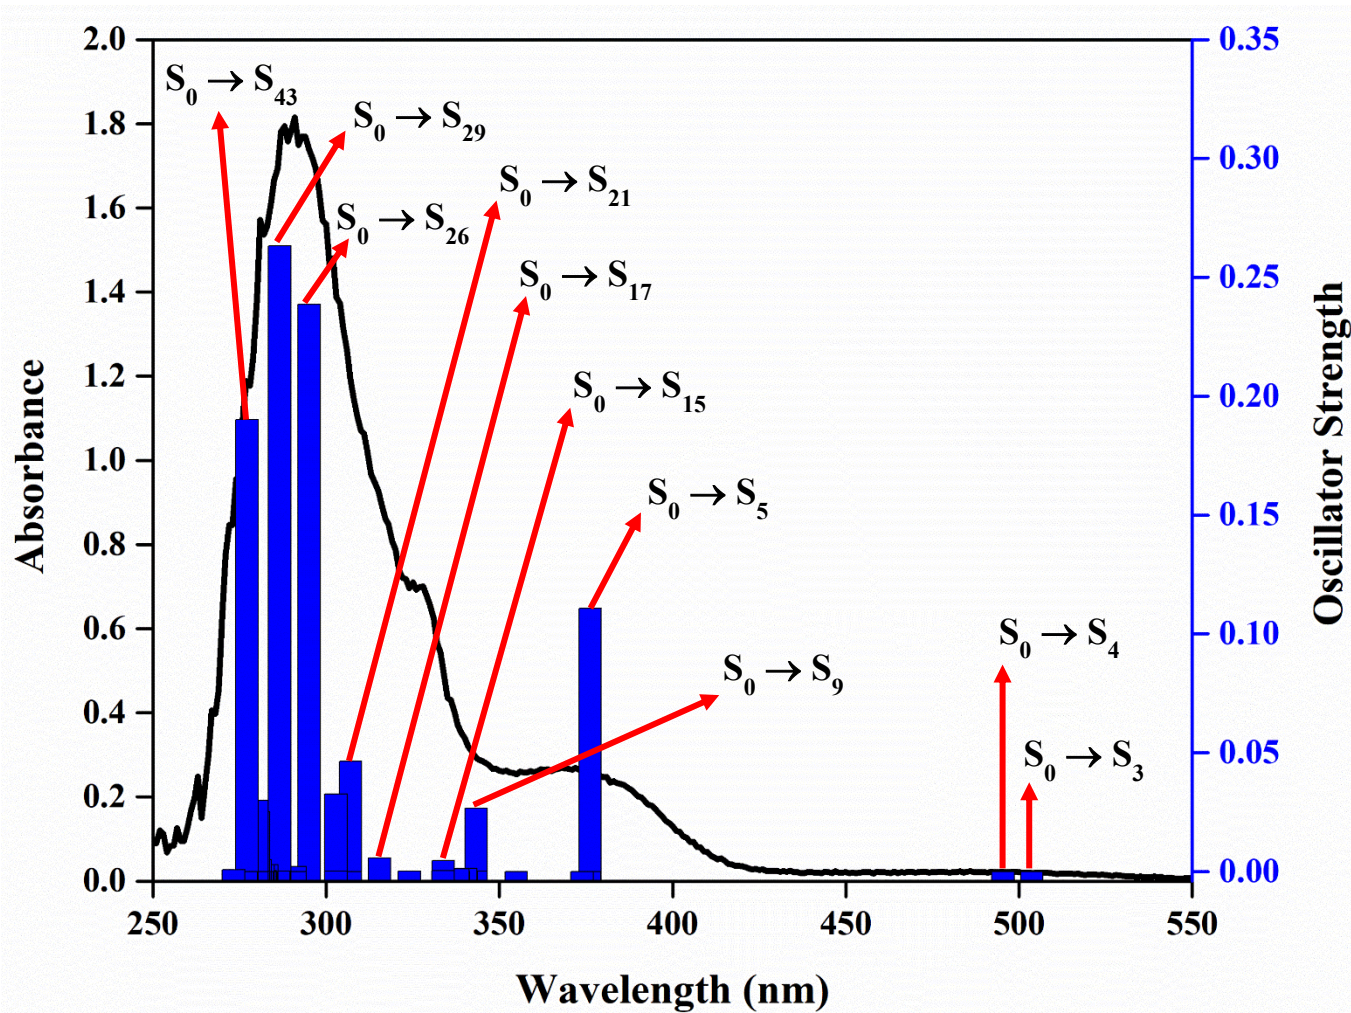

Figure S41. Overlaid experimental (spectra) and theoretical (bars) absorbance for 2b.

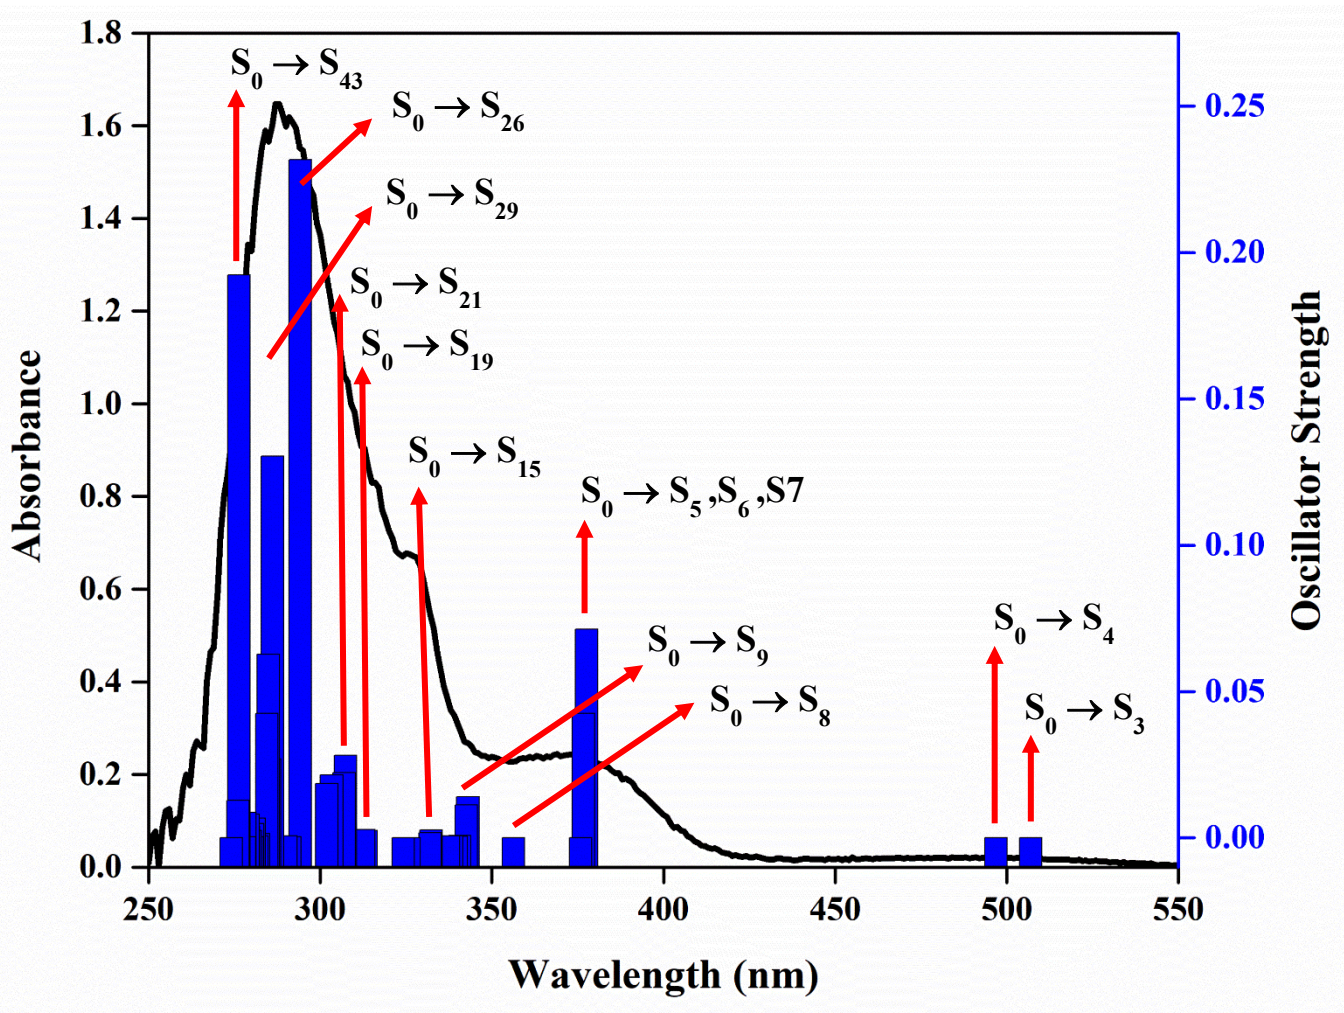

**Figure S42.** Overlaid experimental (spectra) and theoretical (bars) absorbance for 2c.

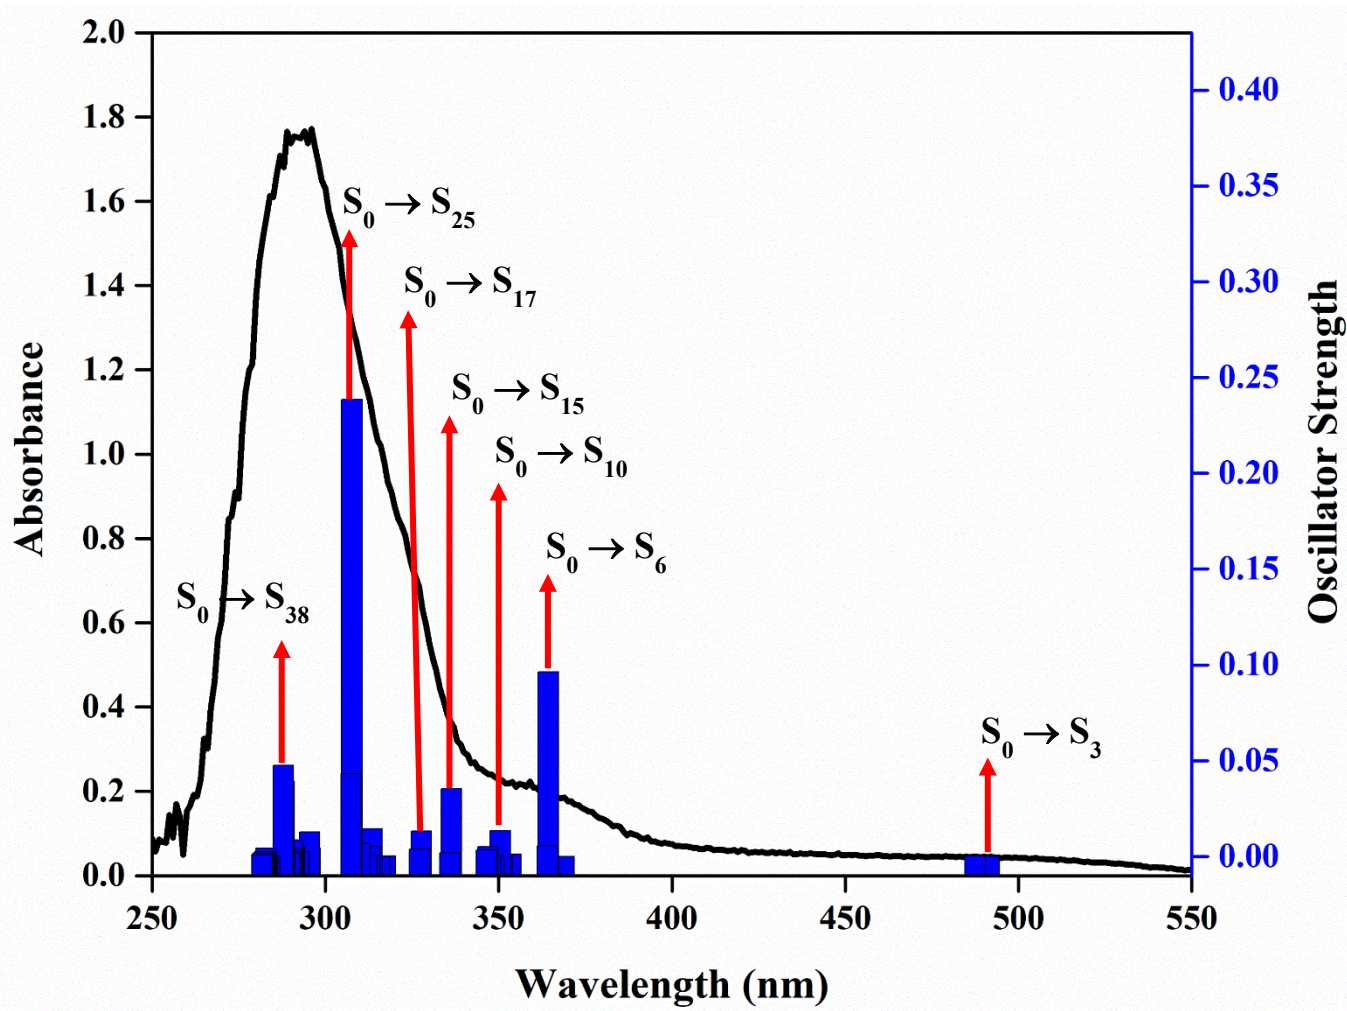

**Figure S43.** Overlaid experimental (spectra) and theoretical (bars) absorbance for **3a**.

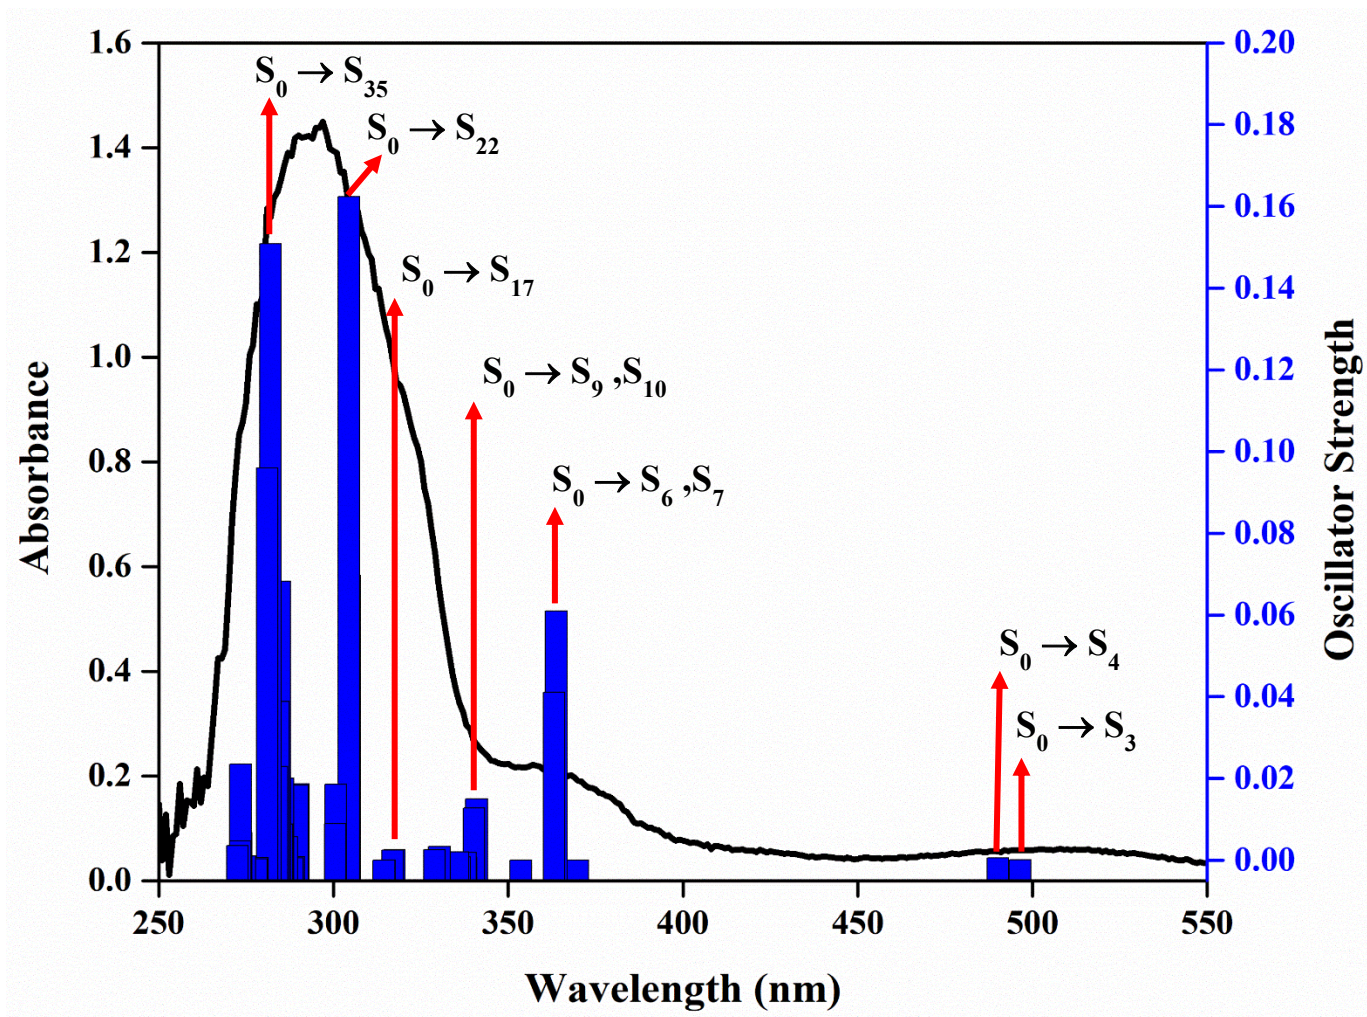

Figure S44. Overlaid experimental (spectra) and theoretical (bars) absorbance for 3b.

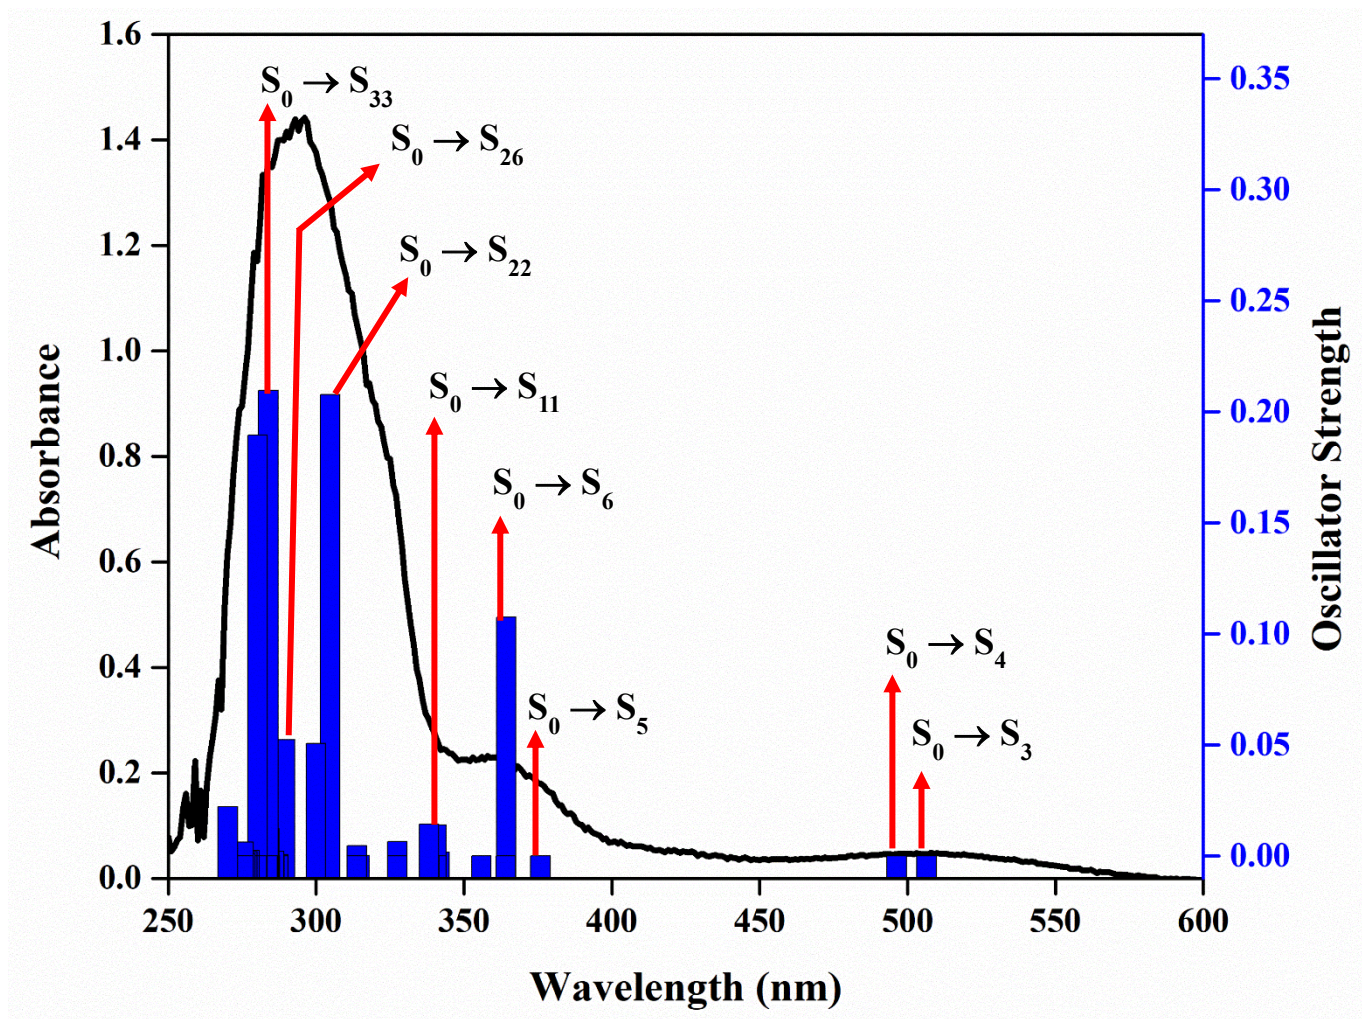

**Figure S45.** Overlaid experimental (spectra) and theoretical (bars) absorbance for **3c**.



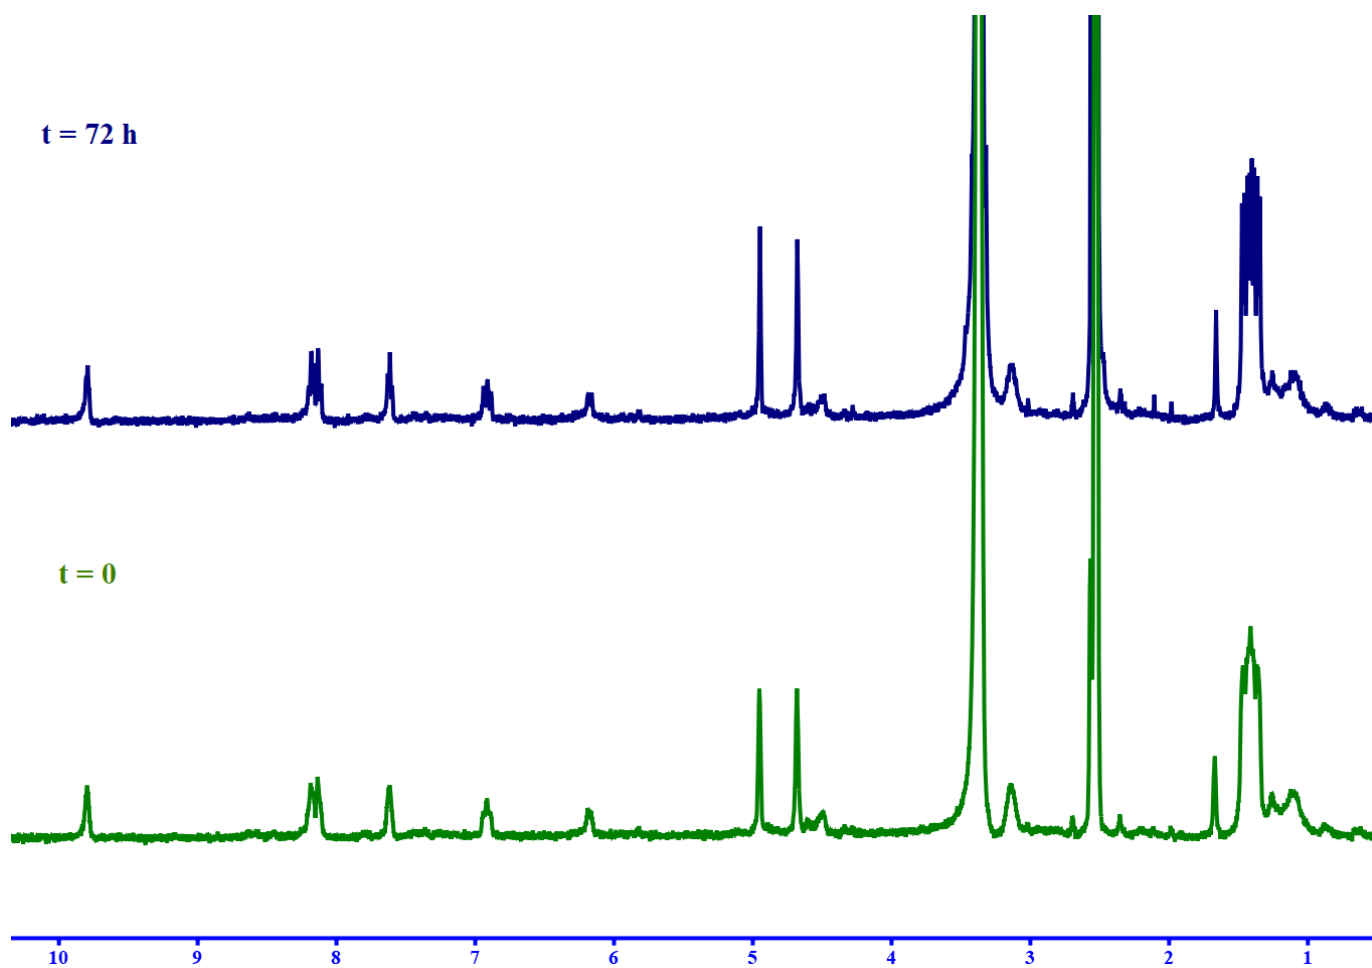

**Figure S46.** Time course  $^1\text{H}$  NMR spectrum of **3c** in  $\text{dms0-d}_6$  at room temperature.

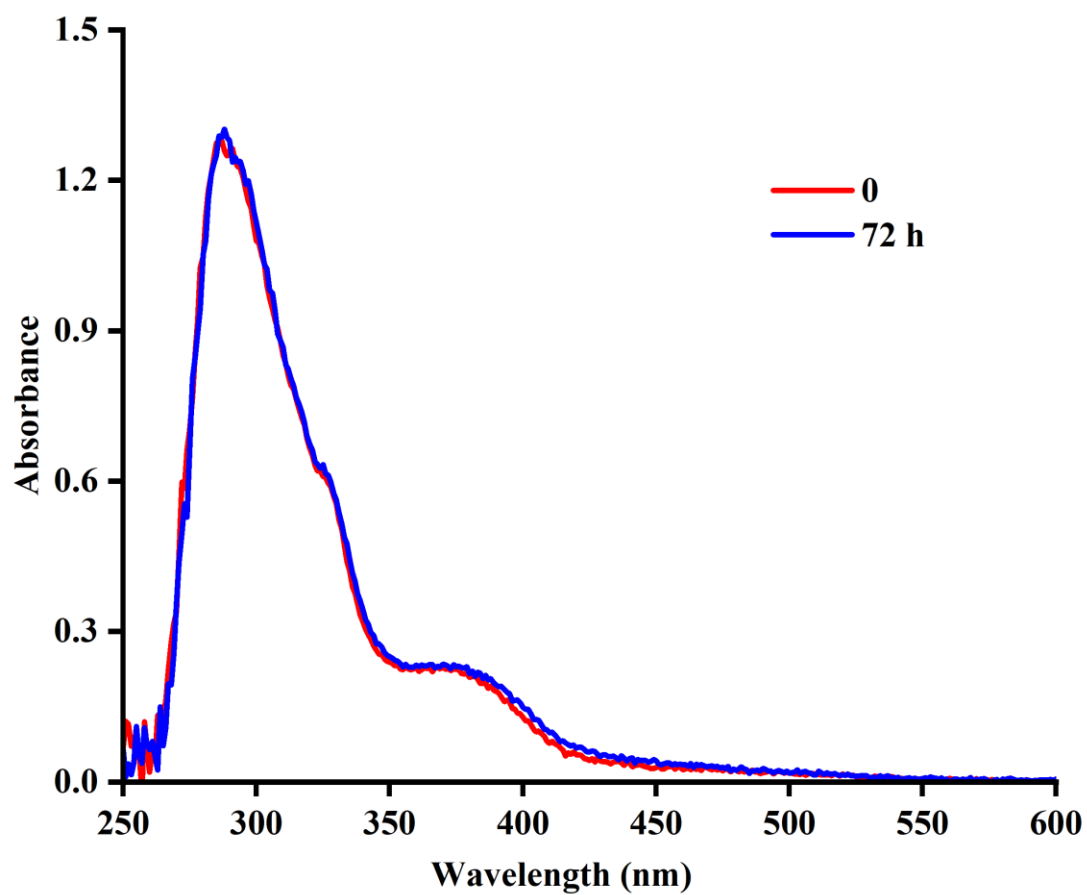

**Figure S47.** Time course UV-vis spectra of **3c** ( $5 \times 10^{-5}$  M) dissolved in dmsu. The spectra were recorded over 72 hours at room temperature.

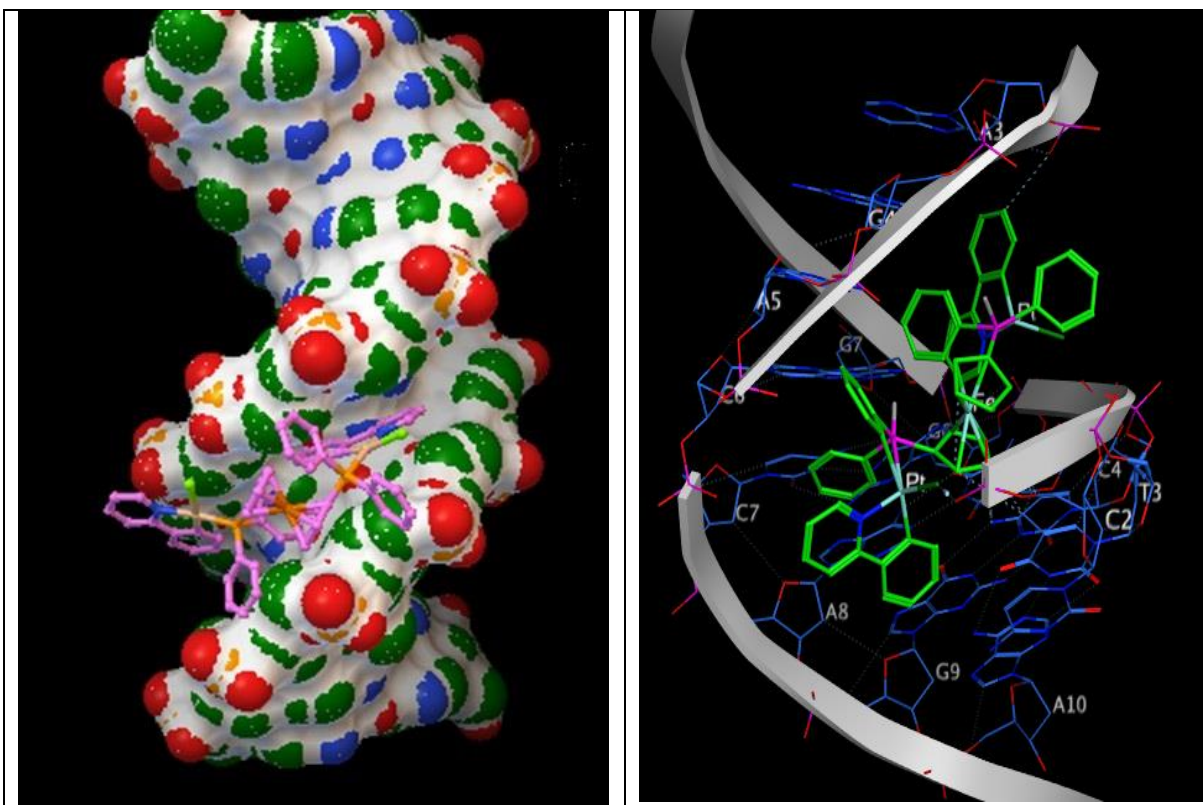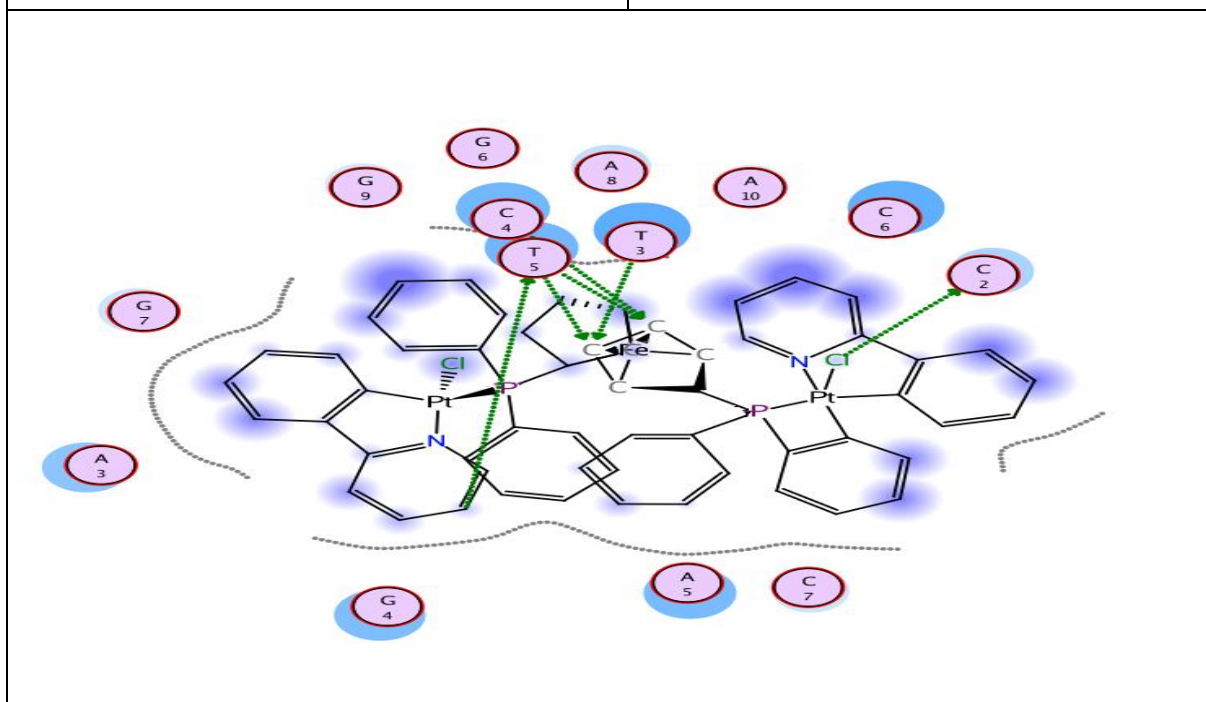

**Figure S48.** The best docked conformation of **2a**, in the best binding sites with 1LU5 structure.

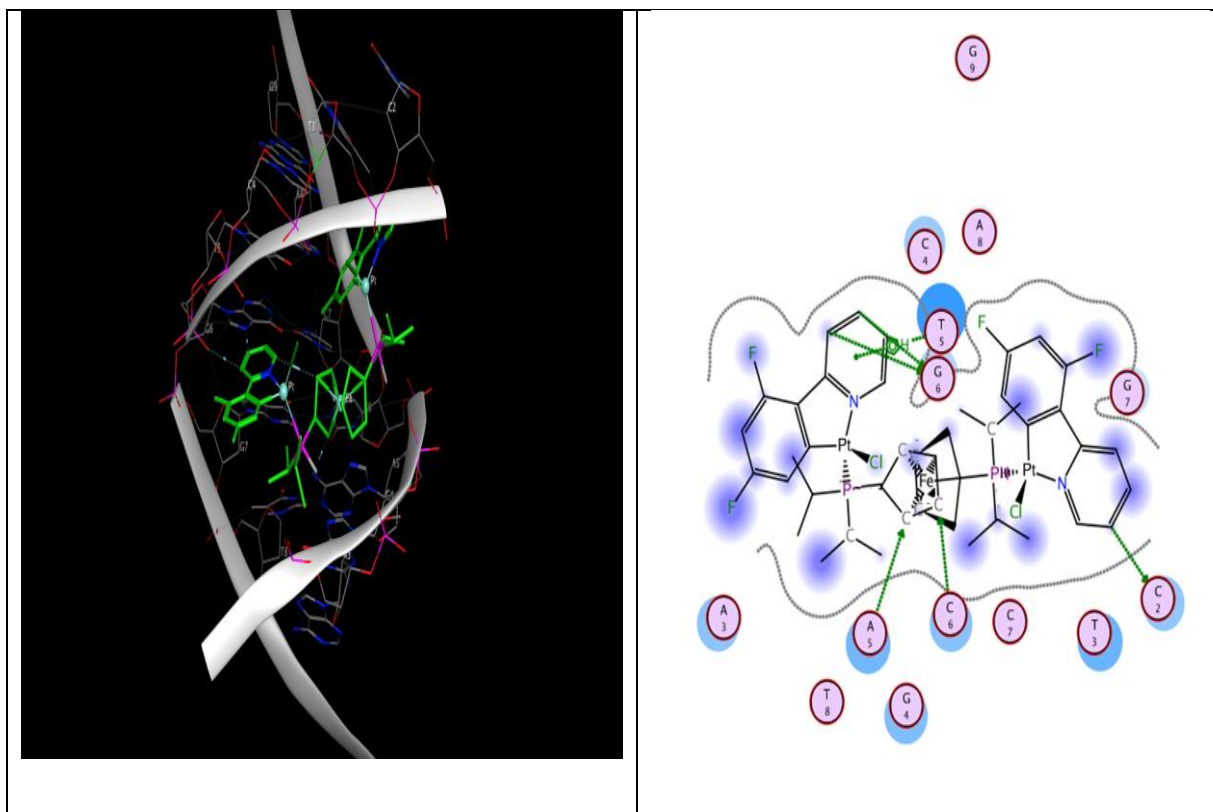

**Figure S49.** The best docked conformation of **3c**, in the best binding sites with 1LU5 structure.

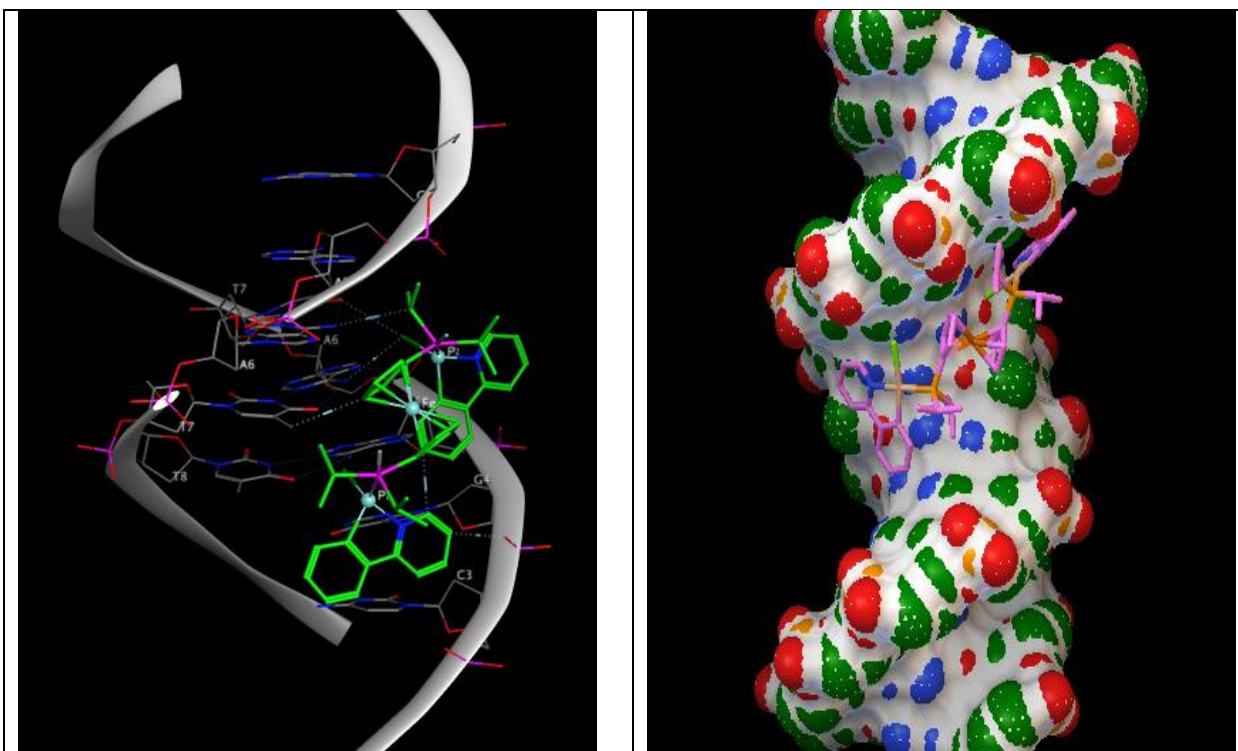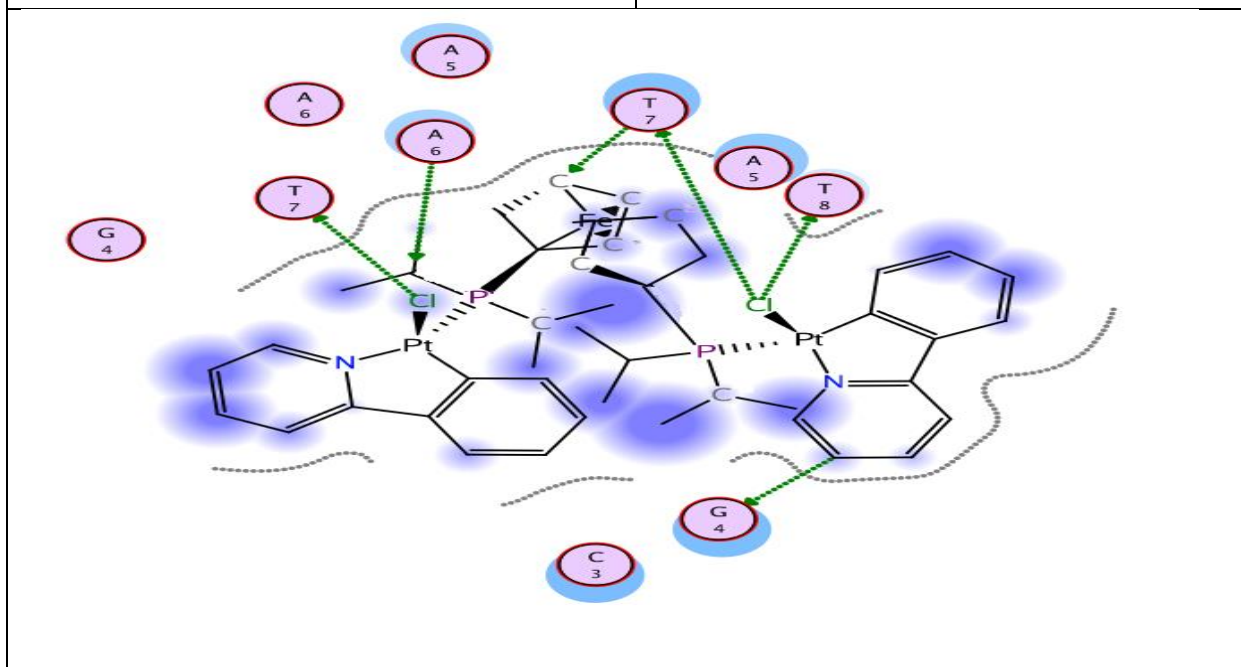

**Figure S50.** The best docked conformation of **2c**, in the best binding sites with 1BNA structure.

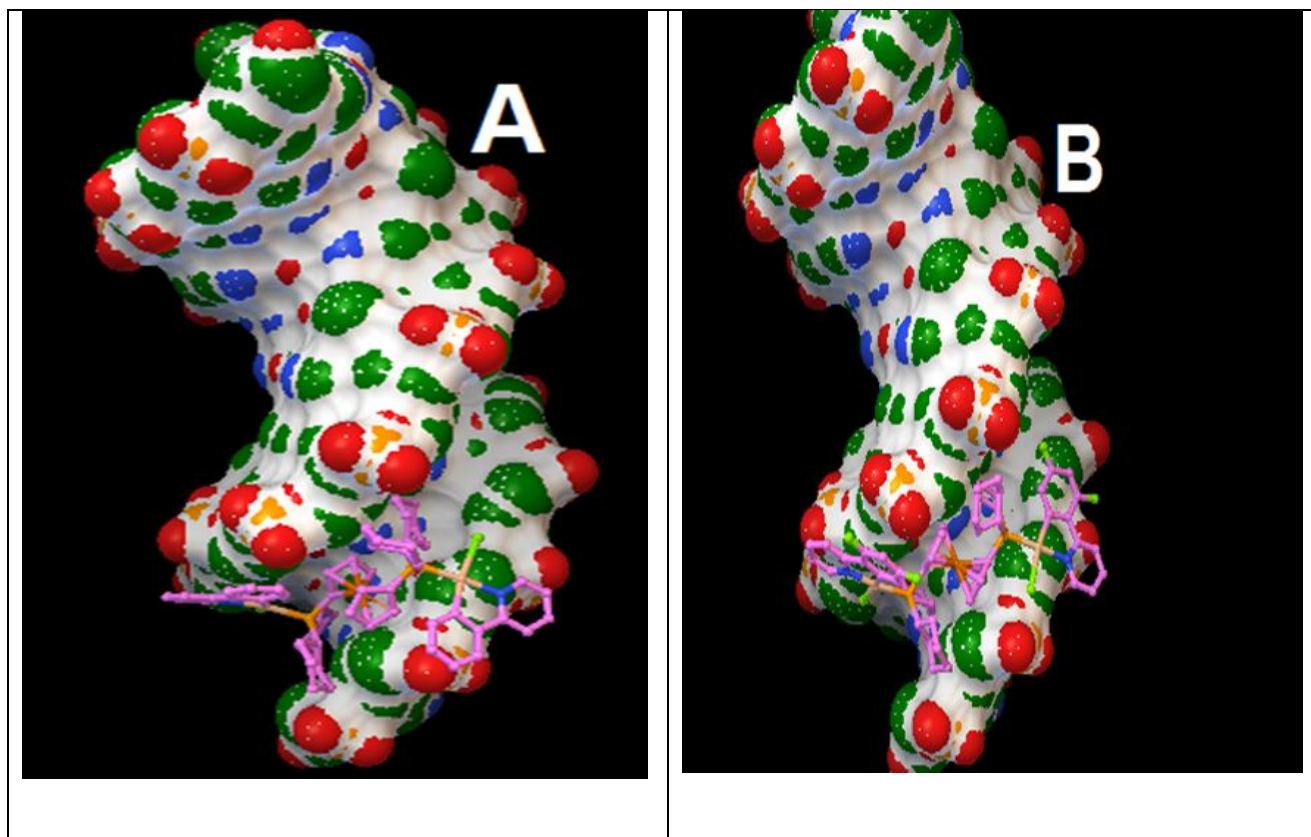

**Figure S51.** Molecular docking simulation studies of the interaction between **2b** with 3CO3 (A) and **3b** in the best binding sites of 3CO3 (B).

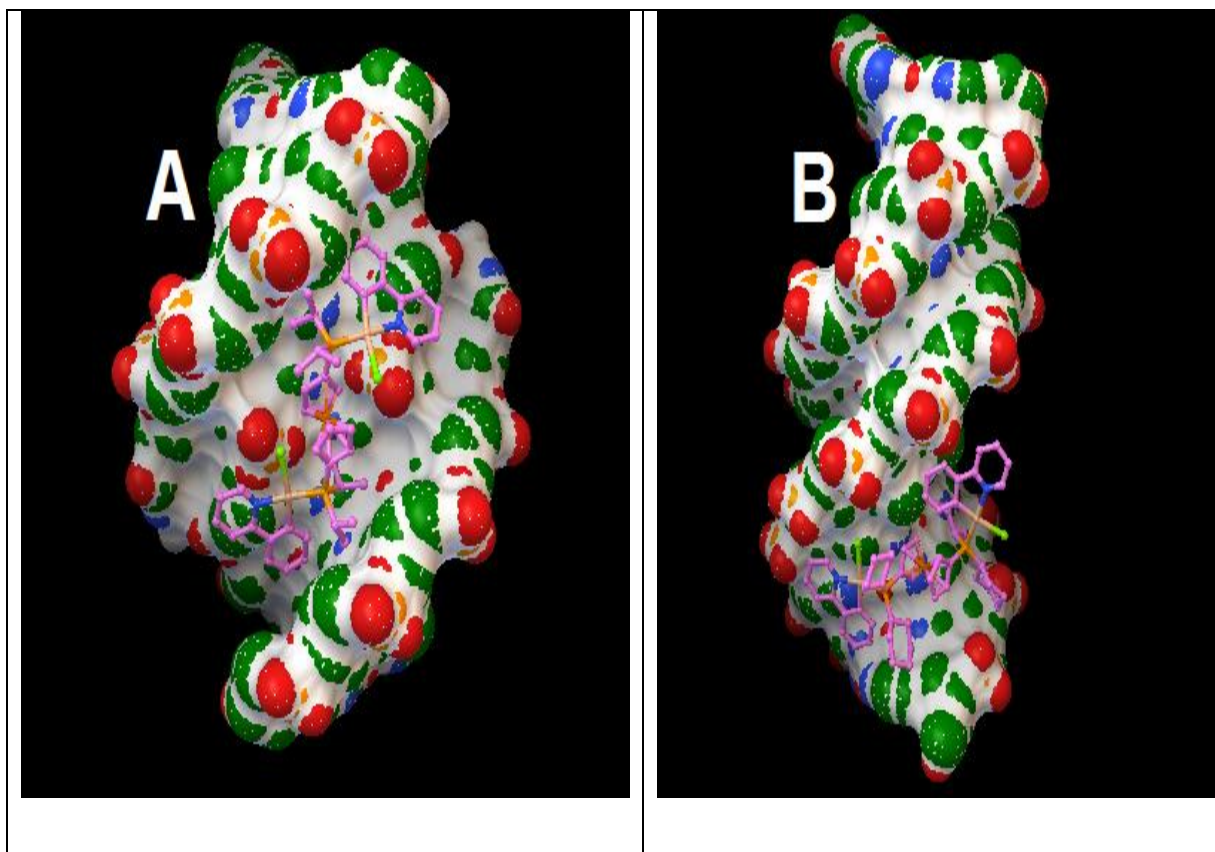

**Figure S52.** The best docked conformation of **2c**, in the best binding sites with 1DDP (A) and **2b** in the 1BNA structure (B).

**Table S21.** One-way ANOVA statistical analysis on the IC<sub>50</sub> data of A549 cell line.

|    |                                   | Mean Diff. | 95.00% CI of diff. | Significant? | Summary | Adjusted P Value |     |
|----|-----------------------------------|------------|--------------------|--------------|---------|------------------|-----|
| 5  | Tukey's multiple comparisons test |            |                    |              |         |                  |     |
| 6  | 2a vs. 2b                         | -7.000     | -8.692 to -5.308   | Yes          | ****    | <0.0001          | A-B |
| 7  | 2a vs. 2c                         | 25.40      | 23.71 to 27.09     | Yes          | ****    | <0.0001          | A-C |
| 8  | 2a vs. 3a                         | 4.960      | 3.268 to 6.652     | Yes          | ****    | <0.0001          | A-D |
| 9  | 2a vs. 3b                         | 0.2600     | -1.432 to 1.952    | No           | ns      | 0.9980           | A-E |
| 10 | 2a vs. 3c                         | 41.85      | 40.16 to 43.54     | Yes          | ****    | <0.0001          | A-F |
| 11 | 2a vs. cisplatin                  | 32.60      | 30.91 to 34.29     | Yes          | ****    | <0.0001          | A-G |
| 12 | 2b vs. 2c                         | 32.40      | 30.71 to 34.09     | Yes          | ****    | <0.0001          | B-C |
| 13 | 2b vs. 3a                         | 11.96      | 10.27 to 13.65     | Yes          | ****    | <0.0001          | B-D |
| 14 | 2b vs. 3b                         | 7.260      | 5.568 to 8.952     | Yes          | ****    | <0.0001          | B-E |
| 15 | 2b vs. 3c                         | 48.85      | 47.16 to 50.54     | Yes          | ****    | <0.0001          | B-F |
| 16 | 2b vs. cisplatin                  | 39.60      | 37.91 to 41.29     | Yes          | ****    | <0.0001          | B-G |
| 17 | 2c vs. 3a                         | -20.44     | -22.13 to -18.75   | Yes          | ****    | <0.0001          | C-D |
| 18 | 2c vs. 3b                         | -25.14     | -26.83 to -23.45   | Yes          | ****    | <0.0001          | C-E |
| 19 | 2c vs. 3c                         | 16.45      | 14.76 to 18.14     | Yes          | ****    | <0.0001          | C-F |
| 20 | 2c vs. cisplatin                  | 7.200      | 5.508 to 8.892     | Yes          | ****    | <0.0001          | C-G |
| 21 | 3a vs. 3b                         | -4.700     | -6.392 to -3.008   | Yes          | ****    | <0.0001          | D-E |
| 22 | 3a vs. 3c                         | 36.89      | 35.20 to 38.58     | Yes          | ****    | <0.0001          | D-F |
| 23 | 3a vs. cisplatin                  | 27.64      | 25.95 to 29.33     | Yes          | ****    | <0.0001          | D-G |
| 24 | 3b vs. 3c                         | 41.59      | 39.90 to 43.28     | Yes          | ****    | <0.0001          | E-F |
| 25 | 3b vs. cisplatin                  | 32.34      | 30.65 to 34.03     | Yes          | ****    | <0.0001          | E-G |
| 26 | 3c vs. cisplatin                  | -9.250     | -10.94 to -7.558   | Yes          | ****    | <0.0001          | F-G |

**Table S22.** One-way ANOVA statistical analysis on the IC<sub>50</sub> data of MCF-7 cell line.

| Ordinary one-way ANOVA<br>Multiple comparisons |                                   |            |                    |              |         |                  |     |
|------------------------------------------------|-----------------------------------|------------|--------------------|--------------|---------|------------------|-----|
|                                                |                                   | Mean Diff. | 95.00% CI of diff. | Significant? | Summary | Adjusted P Value |     |
| 5                                              | Tukey's multiple comparisons test |            |                    |              |         |                  |     |
| 6                                              | 2a vs. 2b                         | 1.520      | -1.306 to 4.346    | No           | ns      | 0.5470           | A-B |
| 7                                              | 2a vs. 2c                         | 16.59      | 13.76 to 19.42     | Yes          | ****    | <0.0001          | A-C |
| 8                                              | 2a vs. 3a                         | 7.250      | 4.424 to 10.08     | Yes          | ****    | <0.0001          | A-D |
| 9                                              | 2a vs. 3b                         | 3.670      | 0.8442 to 6.496    | Yes          | **      | 0.0079           | A-E |
| 10                                             | 2a vs. 3c                         | 20.97      | 18.14 to 23.80     | Yes          | ****    | <0.0001          | A-F |
| 11                                             | 2a vs. cisplatin                  | 29.25      | 26.42 to 32.08     | Yes          | ****    | <0.0001          | A-G |
| 12                                             | 2b vs. 2c                         | 15.07      | 12.24 to 17.90     | Yes          | ****    | <0.0001          | B-C |
| 13                                             | 2b vs. 3a                         | 5.730      | 2.904 to 8.556     | Yes          | ***     | 0.0001           | B-D |
| 14                                             | 2b vs. 3b                         | 2.150      | -0.6758 to 4.976   | No           | ns      | 0.1984           | B-E |
| 15                                             | 2b vs. 3c                         | 19.45      | 16.62 to 22.28     | Yes          | ****    | <0.0001          | B-F |
| 16                                             | 2b vs. cisplatin                  | 27.73      | 24.90 to 30.56     | Yes          | ****    | <0.0001          | B-G |
| 17                                             | 2c vs. 3a                         | -9.340     | -12.17 to -6.514   | Yes          | ****    | <0.0001          | C-D |
| 18                                             | 2c vs. 3b                         | -12.92     | -15.75 to -10.09   | Yes          | ****    | <0.0001          | C-E |
| 19                                             | 2c vs. 3c                         | 4.380      | 1.554 to 7.206     | Yes          | **      | 0.0017           | C-F |
| 20                                             | 2c vs. cisplatin                  | 12.66      | 9.834 to 15.49     | Yes          | ****    | <0.0001          | C-G |
| 21                                             | 3a vs. 3b                         | -3.580     | -6.406 to -0.7542  | Yes          | **      | 0.0096           | D-E |
| 22                                             | 3a vs. 3c                         | 13.72      | 10.89 to 16.55     | Yes          | ****    | <0.0001          | D-F |
| 23                                             | 3a vs. cisplatin                  | 22.00      | 19.17 to 24.83     | Yes          | ****    | <0.0001          | D-G |
| 24                                             | 3b vs. 3c                         | 17.30      | 14.47 to 20.13     | Yes          | ****    | <0.0001          | E-F |
| 25                                             | 3b vs. cisplatin                  | 25.58      | 22.75 to 28.41     | Yes          | ****    | <0.0001          | E-G |
| 26                                             | 3c vs. cisplatin                  | 8.280      | 5.454 to 11.11     | Yes          | ****    | <0.0001          | F-G |



**Table S23.** One-way ANOVA statistical analysis on the IC<sub>50</sub> data of HeLa cell line.

| Ordinary one-way ANOVA<br>Multiple comparisons |                                   |            |                    |              |         |                  |
|------------------------------------------------|-----------------------------------|------------|--------------------|--------------|---------|------------------|
|                                                |                                   | Mean Diff. | 95.00% CI of diff. | Significant? | Summary | Adjusted P Value |
| 5                                              | Tukey's multiple comparisons test |            |                    |              |         |                  |
| 6                                              | 2a vs. 2b                         | 13.48      | 9.282 to 17.68     | Yes          | ****    | <0.0001 A-B      |
| 7                                              | 2a vs. 2c                         | 42.92      | 38.72 to 47.12     | Yes          | ****    | <0.0001 A-C      |
| 8                                              | 2a vs. 3a                         | 11.96      | 7.762 to 16.16     | Yes          | ****    | <0.0001 A-D      |
| 9                                              | 2a vs. 3b                         | 24.90      | 20.70 to 29.10     | Yes          | ****    | <0.0001 A-E      |
| 10                                             | 2a vs. 3c                         | 51.33      | 47.13 to 55.53     | Yes          | ****    | <0.0001 A-F      |
| 11                                             | 2a vs. cisplatin                  | 49.98      | 45.78 to 54.18     | Yes          | ****    | <0.0001 A-G      |
| 12                                             | 2b vs. 2c                         | 29.44      | 25.24 to 33.64     | Yes          | ****    | <0.0001 B-C      |
| 13                                             | 2b vs. 3a                         | -1.520     | -5.718 to 2.678    | No           | ns      | 0.8685 B-D       |
| 14                                             | 2b vs. 3b                         | 11.42      | 7.222 to 15.62     | Yes          | ****    | <0.0001 B-E      |
| 15                                             | 2b vs. 3c                         | 37.85      | 33.65 to 42.05     | Yes          | ****    | <0.0001 B-F      |
| 16                                             | 2b vs. cisplatin                  | 36.50      | 32.30 to 40.70     | Yes          | ****    | <0.0001 B-G      |
| 17                                             | 2c vs. 3a                         | -30.96     | -35.16 to -26.76   | Yes          | ****    | <0.0001 C-D      |
| 18                                             | 2c vs. 3b                         | -18.02     | -22.22 to -13.82   | Yes          | ****    | <0.0001 C-E      |
| 19                                             | 2c vs. 3c                         | 8.410      | 4.212 to 12.61     | Yes          | ***     | 0.0001 C-F       |
| 20                                             | 2c vs. cisplatin                  | 7.060      | 2.862 to 11.26     | Yes          | ***     | 0.0008 C-G       |
| 21                                             | 3a vs. 3b                         | 12.94      | 8.742 to 17.14     | Yes          | ****    | <0.0001 D-E      |
| 22                                             | 3a vs. 3c                         | 39.37      | 35.17 to 43.57     | Yes          | ****    | <0.0001 D-F      |
| 23                                             | 3a vs. cisplatin                  | 38.02      | 33.82 to 42.22     | Yes          | ****    | <0.0001 D-G      |
| 24                                             | 3b vs. 3c                         | 26.43      | 22.23 to 30.63     | Yes          | ****    | <0.0001 E-F      |
| 25                                             | 3b vs. cisplatin                  | 25.08      | 20.88 to 29.28     | Yes          | ****    | <0.0001 E-G      |
| 26                                             | 3c vs. cisplatin                  | -1.350     | -5.548 to 2.848    | No           | ns      | 0.9185 F-G       |

**Table S24.** Chemical descriptors of the complexes **2a–c** and **3a–c**.

| Name      | SA(Ap) <sup>a</sup><br>(Å <sup>2</sup> ) | SA(G) <sup>b</sup><br>(Å <sup>2</sup> ) | Volume<br>(Å <sup>3</sup> ) | HE <sup>c</sup><br>(kcal/mol) | LogP <sub>o/w</sub> | Ref <sup>d</sup><br>(Å <sup>3</sup> ) | Pol <sup>e</sup><br>(Å <sup>3</sup> ) | Mass<br>(amu) |
|-----------|------------------------------------------|-----------------------------------------|-----------------------------|-------------------------------|---------------------|---------------------------------------|---------------------------------------|---------------|
| <b>2a</b> | 764.27                                   | 1049.48                                 | 2165.42                     | -6.87                         | 8.56                | 277.39                                | 98.72                                 | 1323.82       |
| <b>2b</b> | 646.31                                   | 995.62                                  | 2183.00                     | -5.91                         | 9.82                | 263.01                                | 101.02                                | 1348.01       |
| <b>2c</b> | 754.23                                   | 923.10                                  | 1927.07                     | -3.64                         | 7.59                | 215.71                                | 82.10                                 | 1187.75       |
| <b>3a</b> | 776.40                                   | 1062.09                                 | 2221.77                     | -5.64                         | 9.02                | 277.91                                | 98.36                                 | 1395.78       |
| <b>3b</b> | 727.14                                   | 1022.97                                 | 2236.93                     | -4.70                         | 10.96               | 263.61                                | 100.66                                | 1419.97       |
| <b>3c</b> | 787.87                                   | 934.39                                  | 1981.27                     | -2.10                         | 8.83                | 213.17                                | 82.02                                 | 1259.71       |

<sup>a</sup> Surface Area (approx.) Å<sup>2</sup>

<sup>b</sup> Surface Area (grid) Å<sup>2</sup>

<sup>c</sup> Hydration Energy Å<sup>3</sup>

<sup>d</sup> Refractivity

<sup>e</sup> Polarizability

## Experimental Section

### General Remarks

( $^1\text{H}$  (400 MHz),  $^{19}\text{F}$  (376 MHz),  $^{31}\text{P}\{^1\text{H}\}$  (162 MHz) and  $^{195}\text{Pt}\{^1\text{H}\}$  (86 or 64 MHz)) NMR spectra were recorded on a Bruker Avance instrument at 295 K. All chemical shifts ( $\delta$ ) are reported in ppm relative to their corresponding external standards ( $\text{SiMe}_4$  for  $^1\text{H}$ ,  $\text{CFCl}_3$  for  $^{19}\text{F}$ , 85%  $\text{H}_3\text{PO}_4$  for  $^{31}\text{P}$ ,  $\text{Na}_2\text{PtCl}_6$  for  $^{195}\text{Pt}$ ) and the coupling constants ( $J$ ) have been expressed in Hz. The instrument for HR ESI-Mass measurement was a Shimadzu IT-TOF with an electrospray ionization source. Microanalyses were performed with a Thermo Finnigan Flash EA-1112 CHNSO rapid elemental analyzer. UV-vis absorption spectra were carried out using an Ultrospec 4000 Pro. The 2-phenylpyridine (ppyH), 2-(2,4-difluorophenyl)pyridine (dfppyH), 1,1'-bis(diphenylphosphino)ferrocene (dppf), 1,1'-bis(dicyclohexylphosphino)ferrocene (dcpf), 1,1'-bis(diisopropylphosphino)ferrocene (dippf) and all other chemicals were purchased from commercial suppliers.

### X-ray Crystallography

Single crystals of **2b** (CCDC Number: 2213182) and **2c** (CCDC Number: 2213181) were obtained by slow diffusion of *n*-hexane into its  $\text{CH}_2\text{Cl}_2$  solution at room temperature. A suitable crystal was selected for structural analysis and intensity data for **2b** and **2c** were collected using a Bruker APEX-II CCD diffractometer. The crystal was kept at 100.0 K during data collection. Using Olex2,<sup>1</sup> the structure was solved with the ShelXT<sup>2</sup> structure solution program using Intrinsic Phasing and refined with the ShelXL<sup>3</sup> refinement package using Least Squares minimization. The crystallographic data and refinement parameters are summarized in Tables S1 and S2.

## **Computational Details**

Density functional calculations were performed with the program suite Gaussian 09<sup>4</sup> using the B3LYP level of theory.<sup>5-7</sup> The LANL2DZ basis set was chosen to describe Fe and Pt<sup>8, 9</sup> and the 6-31G(d) basis set was chosen for other atoms. The geometries of complexes were fully optimized by employing the density functional theory without imposing any symmetry constraints. In order to ensure the optimized geometries, frequency calculations were performed employing analytical second derivatives. Time-dependent DFT (TD-DFT) calculations were carried out at the same level of theory and basis sets. Solvent effects have been considered by the conductor-like polarizable continuum model (CPCM).<sup>10, 11</sup> The calculations for the electronic absorption spectra by TD-DFT were performed at the same level of theory.

## **Biological Assay**

### **MTT Assay**

Human cell lines were examined using the MTT assay according to procedures in the literature and our previous work.<sup>12-14</sup> The comprehensive description of the MTT assay is provided in the following:

Human cancer cell lines such as breast cancer (MCF-7), cervix cancer (HeLa), and non-small cell lung cancer (A549) as well as human breast epithelial cell line (MCF-10A) were purchased from National Cell Bank of Iran (NCBI, Pasteur Institute, Tehran, Iran). The cancer cells were grown in complete culture media containing RPMI 1640 (Biosera, France), 10% fetal bovine serum (FBS; Gibco, USA) and 1% penicillin–streptomycin (Biosera, France) and kept at 37 °C in a humidified CO<sub>2</sub> incubator. MCF-10A and HeLa cells were cultured in DMEM/Ham's F-12 (GIBCO-Invitrogen, Carlsbad, CA) supplemented with 100 ng/ml cholera toxin, 20 ng/ml epidermal growth factor (EGF), 0.01 mg/ml insulin, 500 ng/ml hydrocortisone, and 5% chelex-treated horse serum.

Cytotoxic activities of the synthesized Pt(II) complexes were determined using a standard 3-(4,5-dimethylthiazol-yl)-2,5-diphenyl-tetrazolium bromide (MTT) assay, as previously described.<sup>13</sup> To do this, the cells with a density of  $0.8 \times 10^4$  cells per well were seeded in 96-well microplates and kept for 24h to recover. The cells were then treated with the Pt(II) complexes in different concentrations from 1 to 100  $\mu\text{M}$  in a triplicate manner and incubated for more 72 hours at 37 °C in humidified CO<sub>2</sub> incubator. Following incubation, the media were completely discarded and replaced with 150  $\mu\text{l}$  of RPMI 1640 containing 0.5 mg/mL MTT solution and incubated at room temperature for 3h. To dissolve the formazan crystals, the media containing MTT was discarded again and 150  $\mu\text{l}$  of DMSO was added to each well and incubated for more 30 min at 37 °C in the dark. It should be mentioned that, cisplatin were applied as reference drug (positive control). The absorbance of individual well was then read at 490 nm with an ELISA reader. The 50% inhibitory concentration of each compound (IC<sub>50</sub>) was calculated with CurveExpert 1.4. Data are presented as mean  $\pm$  SD. Additionally, the stability behavior of **2a–c** and **3a–c** in the cell culture media was investigated by NMR and UV-vis spectroscopies, and the resulting data showed the complexes were stable in these conditions.

### **Docking Procedure**

Docking studies of **2a–c** and **3a–c** on four different DNA structures, (PDB ID: 1BNA, 1DDP, 3CO3, and 1LU5) were carried out using Autodock Dock 4.2 according to known methods in the literature and our previous work.<sup>12, 13</sup> The following procedure reports on the entire docking protocol:

The four different 3D crystal structures of DNA (PDB ID: 1BNA, 1DDP, 3CO3, and 1LU5) were retrieved from protein data bank ([www.rcsb.org/pdb](http://www.rcsb.org/pdb)). Co-crystal ligand molecules were removed from the PDBs structures. Then, MGLtools 1.5.6 was applied to convert these corrected PDB files to PDBQT. For the preparation of ligands, the structure of each Pt(II) complexes was created by HyperChem Professional (Version 8, Hypercube Inc., Gainesville, FL, USA). Each complexes was optimized by molecular mechanic

methods (MM<sup>+</sup>) using HyperChem 8, followed by energy minimization calculations at Hartree-Fock (HF) level, using Gaussian 09. The output structures were thereafter converted to PDBQT using MGLtools 1.5.6. After the preparation of ligands and receptors, the ligands, were docked to DNA using AutoDock 4.2, based on Lamarckian genetic algorithm. The grid center on the DNA structures was maintained by centering the grid box on the minor groove, major groove and the intercalation site to cover the full of DNA structure. The grid maps for all DNA structures had a spacing of 0.375 Å. All the other parameters were kept at their default values. Parameters of metal ions for docking were added to the *gpf* and *dpf* files. Concerning the AutoDock scoring function, the best binding mode of ligands and receptors was chosen base on the lowest docking binding energy conformation. Visualization of the docked pose has been performed by means of Molecular Operating Environment (MOE) and AutoDock Tools 1.5.6.

### **Apoptosis Assay**

Apoptotic effect of **3c** was carried out with A549 cell by using an Annexin V/7AAD assay according to the previously described method.<sup>12, 13, 15</sup> All details are available in the following:

To assess the apoptotic effect of **3c**, BioLegend's PE Annexin V Apoptosis Detection Kit with 7AAD (Biolegend, USA) was applied according to the previously described method. Briefly,  $0.5 \times 10^5$  cells per 1 ml of complete culture medium were seeded in a 24-well culture plate, treated with different concentrations (10, 20, and 30  $\mu$ M) of compound **3c** for 48 h. An untreated sample was also included as a negative control. Treated and untreated cells were then harvested and washed twice with cold BioLegend's Cell Staining Buffer, transferred to the polystyrene round-bottom tubes (BD Bioscience, USA) and stained with 2  $\mu$ l of PE-conjugated Annexin V and 2  $\mu$ l of 7-AAD solution for 15 min at room temperature in the dark. 300  $\mu$ l of Binding Buffer was added to each tube and analyzed immediately by four-color FACSCalibur flow cytometer (BD Bioscience, USA) with proper setting. The data were analyzed by FlowJo software packages.

### **DNA Damage Determination (Comet Assay)**

Genotoxic effect was investigated by the comet assay to measure DNA damage potential of **3c** in A549 cells according to known protocols and our previous work.<sup>16, 17</sup> Details of the protocol can be found in the following:

Using comet assay, the genotoxicity (destructive effect on a cell's genetic material) of **3c** was also assessed. At first,  $5 \times 10^5$  A549 cells in 2 mL complete culture medium were prepared and treated with two different concentrations (5 and 15  $\mu\text{M}$ ) of compound **3c**. Untreated as well as cisplatin (15  $\mu\text{M}$ ) treated cells were also included as negative and positive controls, respectively. The cells were incubated for 20 min at 37 °C in a humidified incubator with 5%  $\text{CO}_2$ . The cells were then participated, re-suspended in 100  $\mu\text{l}$   $1\times$  PBS, mixed with low melting point agarose (LMPA) and dropped on a slide pre-coated slide with normal melting point agarose (NMPA) layer. A coverslip was placed over the gel and put at 4 °C for 15 min. The coverslip was then removed and 100  $\mu\text{l}$  of LMPA was added onto the agarose gel mixture layer, covered with a new coverslip and placed at 4°C for 15 min. The coverslip was then removed and the slides were immersed into cold lysis solution and refrigerated overnight and then in fresh cold alkaline electrophoresis buffer for 40 min. The slides were electrophoresed with the adjusted voltage (25V) and current (300 mA). Afterward, the slides were flooded with neutralizing Tris buffer (pH=7.5) and distilled water for 5 min, and then in 70%, 90% and 100% Ethanol (Merck, Germany), sequentially. The slides were lastly stained with 100  $\mu\text{l}$  ethidium bromide (20 $\mu\text{g}/\text{ml}$ ) and visualized by a high resolution fluorescent microscopy (BX61, Olympus). The comets were observed at 400  $\times$  magnification under a fluorescent microscope. At least 100 comets were randomly recorded for each case, and the percent of DNA in the tail, tail length, and tail moment for each comet was measured using image analysis software (comet score).

## **Determination of Intracellular Reactive Oxygen Species (ROS)**

Intracellular ROS generation was measured in A549 cells using, Dichlorodihydrofluorescein's diacetate (DCFH-DA, a fluorescent probe), adopting published method. Briefly, the cells were treated with varying concentrations of compounds (100-300  $\mu\text{M}$ ) for 4 h and then collected by spinning at 3000 rpm for 5 min. Cold PBS was used twice to wash the pellet and re-suspended in PBS (500  $\mu\text{l}$ ). At 37 °C, cells were incubated with DCFH-DA (5  $\mu\text{M}$ ) in the dark for 1 h. The DCFH-DA marked cells without treating with tested compounds was the control. Upon excitation at 488 nm, the fluorescence has been recorded. The fluorescence (Green color) from 2',7'-dichlorofluorescein (DCF) through 525 nm band-pass filter was measured using FL1 Log channel. The ROS production qualitative analysis was validated by treating HepG2 cell with tested complexes and then staining with 5  $\mu\text{M}$  of DCFH-DA for 1 h. Images collected from Fluorescence microscope (Nikon Eclipse 80i, Japan).

## **Statistical Analysis**

In this work, Analysis of Variance (ANOVA) and Tukey post-hoc test was used to determine statistical significance on all calculations by Graphpad Prism software.  $P$ -values  $\leq 0.0001$  were considered significant. Data are presented as mean  $\pm$  SD.

## References

1. O. V. Dolomanov, L. J. Bourhis, R. J. Gildea, J. A. K. Howard and H. Puschmann, *J. Appl. Cryst.*, 2009, **42**, 339-341.
2. G. Sheldrick, *Acta Cryst.*, 2015, **A71**, 3-8.
3. G. Sheldrick, *Acta Cryst.*, 2015, **C71**, 3-8.
4. M. J. Frisch, G. W. Trucks, H. B. Schlegel, G. E. Scuseria, M. A. Robb, J. R. Cheeseman, G. Scalmani, V. Barone, B. Mennucci, G. A. Petersson, H. Nakatsuji, M. Caricato, X. Li, H. P. Hratchian, A. F. Izmaylov, J. Bloino, G. Zheng, J. L. Sonnenberg, M. Hada, M. Ehara, K. Toyota, R. Fukuda, J. Hasegawa, M. Ishida, T. Nakajima, Y. Honda, O. Kitao, H. Nakai, T. Vreven, J. J. A. Montgomery, J. E. Peralta, F. Ogliaro, M. Bearpark, J. J. Heyd, E. Brothers, K. N. Kudin, V. N. Staroverov, T. Keith, R. Kobayashi, J. Normand, K. Raghavachari, A. Rendell, J. C. Burant, S. S. Iyengar, J. Tomasi, M. Cossi, N. Rega, J. M. Millam, M. Klene, J. E. Knox, J. B. Cross, V. Bakken, C. Adamo, J. Jaramillo, R. Gomperts, R. E. Stratmann, O. Yazyev, A. J. Austin, R. Cammi, C. Pomelli, J. W. Ochterski, R. L. Martin, K. Morokuma, V. G. Zakrzewski, G. A. Voth, P. Salvador, J. J. Dannenberg, S. Dapprich, A. D. Daniels, O. Farkas, J. B. Foresman, J. V. Ortiz, J. Cioslowski and D. J. Fox, *Gaussian 09, Revision A.02*, 2016.
5. A. D. Becke, *J. Chem. Phys.*, 1993, **98**, 5648-5652.
6. B. Miehlich, A. Savin, H. Stoll and H. Preuss, *Chem. Phys. Lett.*, 1989, **157**, 200-206.
7. C. Lee, W. Yang and R. G. Parr, *Phys. Rev. B*, 1988, **37**, 785.
8. W. R. Wadt and P. J. Hay, *J. Chem. Phys.*, 1985, **82**, 284-298.
9. L. E. Roy, P. J. Hay and R. L. Martin, *J. Chem. Theory Comput.*, 2008, **4**, 1029-1031.
10. M. Cossi, G. Scalmani, N. Rega and V. Barone, *J. Chem. Phys.*, 2002, **117**, 43-54.
11. V. Barone, M. Cossi and J. Tomasi, *J. Chem. Phys.*, 1997, **107**, 3210-3221.



12. M. Fereidoon nezhad, Z. Ramezani, M. Nikraves h, J. Zangeneh, M. Golbon Haghighi, Z. Faghih, B. Notash and H. R. Shahsavari, *New J. Chem.*, 2018, **42**, 7177-7187.
13. M. Fereidoon nezhad, H. R. Shahsavari, S. Abedanzadeh, B. Behchenari, M. Hossein-Abadi, Z. Faghih and M. H. Beyzavi, *New J. Chem.*, 2018, **42**, 2385-2392.
14. J. V. Meerloo, G. J. Kaspers and J. Cloos, in *Cancer Cell Culture*, Springer, 2011, pp. 237-245.
15. I. Lakshmanan and S. K. Batra, *Bio-Protocol*, 2013, **3**, e374-e374.
16. P. L. Olive and J. P. Banáth, *Nat. Protoc.*, 2006, **1**, 23-29.
17. N. Ghassemi-Barghi, J. Varshosaz, M. Etebari and A. J. Dehkordi, *Toxicol. In Vitro*, 2016, **36**, 46-52.
